# Supplementary material for: AFIR explorations of transition states of extended unsaturated systems: automatic location of ambimodal transition states
Source: Royal Society of Chemistry journal article supplement (doi:10.1039/d0cp02379e), 2020-01-01

## **Supplementary Information:**

# **AFIR explorations of transition states of extended unsaturated systems: automatic location of ambimodal transition states**

Takuma Ito,<sup>a</sup> Yu Harabuchi,<sup>b,c,d,e\*</sup> and Satoshi Maeda<sup>b,c,d\*</sup>

<sup>a</sup> Graduate School of Chemical Sciences and Engineering, Hokkaido University,

Sapporo 060-8628, Japan.

<sup>b</sup> Department of Chemistry, Faculty of Science, Hokkaido University, Sapporo 060-

0810, Japan.

<sup>c</sup> Institute for Chemical Reaction Design and Discovery (WPI-ICReDD), Hokkaido

University, Sapporo 001-0021, Japan

<sup>d</sup> JST, ERATO Maeda Artificial Intelligence for Chemical Reaction Design and

Discovery Project, Sapporo 060-0810, Japan

<sup>e</sup> JST, PRESTO, 4-1-8 Honcho, Kawaguchi, Saitama, 332-0012, Japan

**Table SII.** Cartesian coordinates (in Å) of the optimized TS structures at the  $\omega$ B97X-D/D95V level. Energies in a.u. are also shown.

29

TS0 -803.009923

|   |                 |                 |                 |
|---|-----------------|-----------------|-----------------|
| C | 1.206269891675  | 0.314667496489  | -2.292677184385 |
| C | 0.258658373725  | 1.175809441375  | -1.446083152651 |
| C | 0.638717113231  | 0.967212097527  | -0.115056397402 |
| C | 1.607914990623  | -0.119434482446 | -0.059122545345 |
| C | 1.898390765100  | -0.568958348081 | -1.318900015538 |
| H | 1.999714094148  | -0.508748869867 | 0.870745971488  |
| O | 1.345286242569  | 0.381969745614  | -3.523133923543 |
| C | 0.112671793729  | 1.723650023370  | 1.009762432129  |
| H | -0.167683247296 | 2.100192692399  | -1.817398649599 |
| H | 2.570182423022  | -1.365011300934 | -1.601926455572 |
| O | 0.792155664964  | 1.474492898232  | 2.180679283008  |
| O | -0.855240228249 | 2.508678372645  | 0.956524946516  |
| C | 0.332952571674  | 2.186137127423  | 3.369718445980  |
| H | 0.982723103785  | 1.843965824853  | 4.173303724385  |
| H | 0.426755631894  | 3.264949524256  | 3.223907699170  |
| H | -0.712730973947 | 1.944366279272  | 3.578900141997  |
| C | -1.399973388221 | 0.049985811617  | -1.897109046058 |
| C | -1.058275532788 | -1.263543406791 | -1.564805741782 |
| C | -1.063250112910 | -1.692356354495 | -0.212774355761 |
| H | -0.710332265472 | -1.960842992649 | -2.318693010783 |
| H | -1.473356615576 | 0.311978438513  | -2.948233696766 |
| H | -2.025743544885 | 0.632174009836  | -1.225788959166 |
| O | -0.554818688434 | -2.958701612933 | 0.092106097002  |
| C | -0.544148168168 | -3.073317428766 | 1.467621824156  |
| C | -1.031489372335 | -1.928033873826 | 2.048121400399  |
| C | -1.368793245575 | -1.034879350900 | 0.975832610631  |
| H | -0.182268278736 | -4.006081628159 | 1.864351488978  |
| H | -1.835511791877 | -0.066855031248 | 1.064248806073  |
| H | -1.139424346591 | -1.743486497972 | 3.103909534227  |

29

TS1 -803.003778

|   |                 |                 |                 |
|---|-----------------|-----------------|-----------------|
| C | 0.664251451250  | 1.961821788656  | -1.804694182593 |
| C | -0.470388296266 | 1.212476503741  | -1.088384393272 |
| C | -0.050892404419 | -0.131057416034 | -1.002678016379 |
| C | 1.337688614791  | -0.217253408741 | -1.445356670059 |
| C | 1.793927216623  | 1.000879017316  | -1.867487542483 |
| H | 1.898143679643  | -1.142313767751 | -1.425654608046 |
| O | 0.610405389547  | 3.132878738275  | -2.212615614327 |
| C | -0.911992085128 | -1.260336890029 | -0.692784178497 |
| H | -1.508140623821 | 1.493506277874  | -1.228335757182 |
| H | 2.772604821802  | 1.249169102263  | -2.250217010059 |

|   |                 |                 |                 |
|---|-----------------|-----------------|-----------------|
| O | -0.215142731139 | -2.455841432565 | -0.715720441939 |
| O | -2.128187901260 | -1.213816600563 | -0.434182603391 |
| C | -0.988076729011 | -3.663338563847 | -0.448243982773 |
| H | -0.263276179169 | -4.475646719525 | -0.471830149334 |
| H | -1.470664862265 | -3.596996602010 | 0.530025985775  |
| H | -1.753895098691 | -3.801105739941 | -1.215951242161 |
| C | 0.347666009806  | -2.046716150041 | 2.880026525552  |
| C | -0.448107999133 | -1.043730356536 | 2.458606016993  |
| C | 0.040011507966  | 0.172203342013  | 1.830811162131  |
| H | -1.528299946042 | -1.113072629615 | 2.541999945455  |
| H | -0.074289053814 | -2.936587200671 | 3.333371217585  |
| H | 1.428499632933  | -2.011837606622 | 2.778573817429  |
| O | -0.915997482548 | 1.082450819288  | 1.444297980137  |
| C | -0.243813382282 | 2.065046940424  | 0.682837278723  |
| C | 1.151247801127  | 1.949431365753  | 0.983942199409  |
| C | 1.318807038545  | 0.721826821968  | 1.635176673243  |
| H | -0.799512517801 | 2.979280204426  | 0.532591654037  |
| H | 2.248714760762  | 0.257281484614  | 1.919251701405  |
| H | 1.914868134192  | 2.650605547167  | 0.690684010953  |

29

TS2 -803.002063

|   |                 |                 |                 |
|---|-----------------|-----------------|-----------------|
| C | 1.767194529979  | -0.493271026558 | -2.341236967288 |
| C | 0.661224711134  | -1.060150903993 | -1.426906927261 |
| C | -0.132492899903 | 0.043591444539  | -1.073783088741 |
| C | 0.518715832425  | 1.275456718352  | -1.546368068131 |
| C | 1.648169581624  | 0.987606099773  | -2.253157886946 |
| H | 0.115351143927  | 2.259506132540  | -1.346192199502 |
| O | 2.568830159905  | -1.167306083713 | -3.003214006173 |
| C | -1.451415020547 | -0.063238355222 | -0.485928916575 |
| H | 0.253318820490  | -2.048722904899 | -1.596378730246 |
| H | 2.339644730519  | 1.672814062995  | -2.719788884943 |
| O | -2.086175004062 | 1.160434649587  | -0.380751345283 |
| O | -1.991456608415 | -1.124309003011 | -0.112726342669 |
| C | -3.436329172836 | 1.145192484014  | 0.171482483834  |
| H | -3.743994495748 | 2.189484580780  | 0.199892115613  |
| H | -4.100876154869 | 0.560993871752  | -0.470184169509 |
| H | -3.432540213129 | 0.708739149884  | 1.173414502791  |
| C | 1.935189145483  | -1.589449197242 | 0.052208703942  |
| C | 1.135623570831  | -1.888289925884 | 1.157453715118  |
| C | 0.503474779544  | -0.860623153765 | 1.883338599209  |
| H | 0.863841125606  | -2.912251659382 | 1.389636517260  |
| H | 2.451110812430  | -2.400896695920 | -0.452257798300 |
| H | 2.463331103364  | -0.635580108948 | 0.030741838173  |
| O | -0.444924001576 | -1.198338651758 | 2.853425271223  |
| C | -1.044698680121 | -0.027075332937 | 3.258355348037  |
| C | -0.501572625107 | 1.050423335858  | 2.599901040669  |

|   |                 |                 |                |
|---|-----------------|-----------------|----------------|
| C | 0.497090168153  | 0.527155595286  | 1.713608340386 |
| H | -1.807544431516 | -0.120916316823 | 4.011921731569 |
| H | 1.174996578559  | 1.094770383409  | 1.098217928614 |
| H | -0.778754330104 | 2.083595124338  | 2.724606916431 |

29

TS3 -803.001583

|   |                 |                 |                 |
|---|-----------------|-----------------|-----------------|
| C | -1.330740892340 | 0.393594060789  | -2.275751461143 |
| C | -0.481313278570 | 1.174403108557  | -1.340596644220 |
| C | 0.588966839914  | 0.372198983043  | -0.999040714316 |
| C | 0.418499902672  | -0.967518621619 | -1.496092425238 |
| C | -0.833661030764 | -1.052161033207 | -2.123674703312 |
| H | 1.145709277684  | -1.756042351537 | -1.373799733795 |
| O | -2.235675292279 | 0.787553275175  | -3.025204252195 |
| C | 1.726446844281  | 0.830395847946  | -0.171461574017 |
| H | -0.612943804735 | 2.219186577677  | -1.102984345662 |
| H | -1.115710738032 | -1.821023725346 | -2.833643124899 |
| O | 2.679795429457  | -0.143629527922 | -0.026251002320 |
| O | 1.832924833039  | 1.952395996517  | 0.339931747822  |
| C | 3.840211953370  | 0.194374889643  | 0.794140469096  |
| H | 4.467048300097  | -0.695237287667 | 0.781450371496  |
| H | 4.366467476403  | 1.051757661924  | 0.367793745608  |
| H | 3.520400823493  | 0.437839703673  | 1.810680571428  |
| C | -2.270095129879 | -1.368913193081 | -0.734547275614 |
| C | -2.159659853573 | -0.335217148987 | 0.216353765555  |
| C | -1.203255492864 | -0.430465110541 | 1.265455611704  |
| H | -2.811694898375 | 0.529536626012  | 0.189151304805  |
| H | -3.120153519405 | -1.347272218603 | -1.410470878369 |
| H | -1.930598685729 | -2.365029015965 | -0.467267479594 |
| O | -1.063836844612 | 0.648565356303  | 2.140193536634  |
| C | 0.013990961539  | 0.376460874896  | 2.960722690907  |
| C | 0.560097088701  | -0.841251739820 | 2.640071085812  |
| C | -0.216793912997 | -1.367769866658 | 1.549961315431  |
| H | 0.251510562813  | 1.125753459787  | 3.695198162276  |
| H | -0.088792464495 | -2.322885252629 | 1.068363861353  |
| H | 1.405810978195  | -1.308503859569 | 3.116919097500  |

29

TS4 -803.001182

|   |                 |                 |                 |
|---|-----------------|-----------------|-----------------|
| C | -1.910779426330 | -1.262521096034 | -1.414832491121 |
| C | -0.383976325187 | -1.166459041518 | -1.194124223423 |
| C | -0.219392690962 | -0.977825915856 | 0.192778085119  |
| C | -1.543075006587 | -0.832996157952 | 0.818829817692  |
| C | -2.536864300502 | -0.985576889640 | -0.099449080531 |
| H | -1.663799748852 | -0.631098129721 | 1.874953123111  |
| O | -2.455747779601 | -1.512474235032 | -2.500656687286 |
| C | 1.045389661769  | -1.114926979003 | 0.877328913566  |
| H | 0.286184541765  | -1.768786272422 | -1.796431117731 |

|   |                 |                 |                 |
|---|-----------------|-----------------|-----------------|
| H | -3.602897290140 | -0.904991723847 | 0.048401922598  |
| O | 0.931260328718  | -0.939725450647 | 2.245225313399  |
| O | 2.144997492004  | -1.345847595009 | 0.331283165473  |
| C | 2.157437660842  | -1.071872253590 | 3.022722093654  |
| H | 1.858673101265  | -0.907480681701 | 4.056830922702  |
| H | 2.585717215984  | -2.069099926764 | 2.893790469213  |
| H | 2.893503226187  | -0.327681294422 | 2.706152705550  |
| C | 0.172426241552  | 2.865644531143  | 1.980036635191  |
| C | -0.532445229973 | 2.454287238290  | 0.907240680314  |
| C | 0.048629232476  | 1.769060192109  | -0.234248334728 |
| H | -1.607429477989 | 2.599345092971  | 0.857089012276  |
| H | -0.316770956240 | 3.363519972106  | 2.809438168712  |
| H | 1.243943033929  | 2.708976308996  | 2.063779678341  |
| O | -0.816765581721 | 1.389233337564  | -1.234034859319 |
| C | -0.072825818819 | 0.576462466337  | -2.116922782590 |
| C | 1.308437346680  | 0.827392316846  | -1.855734992921 |
| C | 1.372520114052  | 1.521348936570  | -0.647935946675 |
| H | -0.552588774077 | 0.391054448614  | -3.067806367942 |
| H | 2.261474166005  | 1.772272530969  | -0.093863673585 |
| H | 2.133965710702  | 0.422664586060  | -2.417511456327 |

29

TS5 -803.001126

|   |                 |                 |                 |
|---|-----------------|-----------------|-----------------|
| C | 1.304434566936  | -0.410189006158 | 0.473928714510  |
| C | 0.056787869314  | -1.243036737419 | 0.787726925765  |
| C | -0.387785795425 | -1.741231106345 | -0.443425612661 |
| C | 0.324914311226  | -1.077199808565 | -1.509217989480 |
| C | 1.268557230087  | -0.215910453476 | -0.993280979599 |
| H | 0.107346535262  | -1.235974481237 | -2.556652906846 |
| O | 2.136534739623  | -0.000809287226 | 1.301268218554  |
| C | -1.499190988960 | -2.671841881306 | -0.583931018815 |
| H | -0.096948057879 | -1.738662406411 | 1.738753571638  |
| H | 1.956308769614  | 0.418492722790  | -1.532060377125 |
| O | -1.701844152582 | -3.055206258977 | -1.890662417227 |
| O | -2.215081927526 | -3.080329686357 | 0.349415627275  |
| C | -2.795802003844 | -3.990514450401 | -2.139846980021 |
| H | -2.788651150923 | -4.154921786322 | -3.215911143039 |
| H | -2.624530505159 | -4.925203156795 | -1.600387098230 |
| H | -3.745824216306 | -3.558410180899 | -1.815438730804 |
| C | -1.022827962998 | 0.455979591161  | 1.229754842860  |
| C | -0.619434885963 | 1.469987764510  | 0.349871323329  |
| C | 0.338785600035  | 2.480210816338  | 0.675667637881  |
| H | -1.092181452234 | 1.558732567925  | -0.622669844418 |
| H | -1.978024285044 | -0.030688754807 | 1.067799348415  |
| H | -0.704171631449 | 0.514328061208  | 2.267651058505  |
| O | 0.612392755708  | 3.431496966672  | -0.314037334546 |
| C | 1.590455271327  | 4.269078085695  | 0.184443693251  |

|   |                |                |                 |
|---|----------------|----------------|-----------------|
| C | 1.948497550010 | 3.878333114561 | 1.451578109204  |
| C | 1.148302202138 | 2.731087731622 | 1.772060411827  |
| H | 1.906817880892 | 5.069205318385 | -0.462035318057 |
| H | 1.178975837517 | 2.156996953922 | 2.683121764249  |
| H | 2.692392585742 | 4.342864796573 | 2.077371223058  |

29

TS6 -802.997498

|   |                 |                 |                 |
|---|-----------------|-----------------|-----------------|
| C | -2.056226374281 | -0.538239899412 | 0.068171849125  |
| C | -0.882044815861 | 0.084085899016  | -0.719273557471 |
| C | 0.164151903486  | -0.874969000706 | -0.649472451701 |
| C | -0.250980951289 | -1.964213886749 | 0.218346125618  |
| C | -1.518658662737 | -1.756924098122 | 0.696757259363  |
| H | 0.389594386251  | -2.807264026432 | 0.442125859863  |
| O | -3.210784983312 | -0.075756965885 | 0.116368429452  |
| C | 1.385151234746  | -0.756606189873 | -1.408704407846 |
| H | -1.081941889437 | 0.630207800465  | -1.635738249505 |
| H | -2.086284047321 | -2.384068844764 | 1.367083376300  |
| O | 2.164872601994  | -1.892929235062 | -1.382050654498 |
| O | 1.742997591877  | 0.280516630271  | -2.014411096277 |
| C | 3.422995974749  | -1.841581316892 | -2.120104983258 |
| H | 3.874630212914  | -2.822140069621 | -1.979157391025 |
| H | 3.234228183093  | -1.647444169932 | -3.178684204490 |
| H | 4.068211704152  | -1.053317389974 | -1.723094513301 |
| C | 1.737637171422  | 0.049047472205  | 1.568519808473  |
| C | 0.602102505520  | 0.389829834513  | 2.247865356140  |
| C | -0.370910224169 | 1.225841537085  | 1.646681978037  |
| H | 0.373689949100  | -0.033277232016 | 3.219701972810  |
| H | 2.432427202543  | -0.676923629810 | 1.976335348192  |
| H | 2.042233428805  | 0.558448068115  | 0.661668781402  |
| O | -1.468774458909 | 1.656198303349  | 2.356584425384  |
| C | -2.217434446205 | 2.487064336719  | 1.504862755635  |
| C | -1.628923024948 | 2.582554555036  | 0.289098614170  |
| C | -0.457913897841 | 1.691219815801  | 0.292814938806  |
| H | -3.117640969396 | 2.892566522101  | 1.930572692009  |
| H | 0.428210706572  | 1.896947778949  | -0.300367083900 |
| H | -1.998666119476 | 3.137671850519  | -0.556421103788 |

29

TS7 -802.996497

|   |                 |                 |                 |
|---|-----------------|-----------------|-----------------|
| C | -0.406866066594 | -0.432434173355 | 2.415255217267  |
| C | 0.816766599051  | -0.067347425189 | 1.534488566380  |
| C | 0.293732069685  | 1.063870142083  | 0.672157248637  |
| C | -0.929360033743 | 1.475936681217  | 1.216757108247  |
| C | -1.363182961342 | 0.623252905032  | 2.253692059311  |
| H | -1.492127036917 | 2.319697578149  | 0.834704389197  |
| O | -0.472136727032 | -1.519446775396 | 3.064548581246  |
| C | 0.908105706213  | 1.501965813958  | -0.522231395657 |

|   |                 |                 |                 |
|---|-----------------|-----------------|-----------------|
| H | 1.561747938912  | 0.339688732101  | 2.233865768885  |
| H | -2.289139426870 | 0.700215130928  | 2.805128431828  |
| O | 0.428985639417  | 2.689549321162  | -1.040080434844 |
| O | 1.810419035085  | 0.851324802110  | -1.152235676726 |
| C | 0.967972923292  | 3.111950451422  | -2.326774982333 |
| H | 0.439619740032  | 4.034711866336  | -2.563704102901 |
| H | 2.043419318885  | 3.289485921685  | -2.250853397613 |
| H | 0.786722268009  | 2.350377285917  | -3.090645089362 |
| C | 1.473193259427  | -1.307955303143 | 0.858718284841  |
| C | 1.020999793325  | -1.429313449201 | -0.550675800288 |
| C | -0.313074455794 | -1.629149348524 | -0.875242653913 |
| H | 1.743176318620  | -1.417712969890 | -1.357716424274 |
| H | 2.558803004234  | -1.230091028340 | 0.877305886344  |
| H | 1.159988711246  | -2.177391201114 | 1.461691353208  |
| O | -0.677207383623 | -1.650821165605 | -2.243376765359 |
| C | -2.013074297174 | -1.872829756083 | -2.292342619796 |
| C | -2.546927693302 | -2.026369318106 | -1.019770076625 |
| C | -1.475476063460 | -1.871014748518 | -0.110899490053 |
| H | -2.460862662234 | -1.902305982159 | -3.272067634031 |
| H | -1.506381068627 | -1.964701670540 | 0.965800869300  |
| H | -3.578357517937 | -2.222406825346 | -0.781682522010 |

29

TS8 -802.995476

|   |                 |                 |                 |
|---|-----------------|-----------------|-----------------|
| C | -0.907851782296 | -1.745708553478 | -0.328117867547 |
| C | -0.266700594081 | -0.515900458924 | -1.022515430570 |
| C | 1.073961381526  | -0.453963472252 | -0.398363879815 |
| C | 1.073905512169  | -1.228621724138 | 0.762936123838  |
| C | -0.189717602792 | -1.828608004637 | 0.949061366410  |
| H | 1.901953886738  | -1.276654742990 | 1.456794425729  |
| O | -1.853758999766 | -2.426592048570 | -0.756609539742 |
| C | 2.099859708747  | 0.455978107942  | -0.862737260968 |
| H | -0.311980723942 | -0.479329110363 | -2.108968525248 |
| H | -0.476952874004 | -2.490156191021 | 1.754082579039  |
| O | 3.321532483266  | 0.267450225538  | -0.258117040708 |
| O | 1.906310923765  | 1.356450031011  | -1.708985691215 |
| C | 4.402594673099  | 1.157774564937  | -0.671250179246 |
| H | 5.270873324158  | 0.831596404363  | -0.101223645257 |
| H | 4.581615445737  | 1.062137701763  | -1.745008148340 |
| H | 4.151606482011  | 2.196977439567  | -0.442050591006 |
| C | 0.506936646427  | 1.667273020820  | 1.941729592304  |
| C | -0.613184715494 | 0.923530215569  | 2.129906461800  |
| C | -1.407420732636 | 0.433417150180  | 1.039253534846  |
| H | -0.945248507205 | 0.650778046137  | 3.126493914613  |
| H | 1.112650685648  | 1.977125209455  | 2.786398567480  |
| H | 0.817603337632  | 2.017302906587  | 0.962959259559  |
| O | -2.729748899145 | 0.132396197401  | 1.292891161800  |

|   |                 |                 |                 |
|---|-----------------|-----------------|-----------------|
| C | -3.431402383183 | 0.202828222682  | 0.060887070580  |
| C | -2.624118329856 | 0.570508599718  | -0.945451344400 |
| C | -1.211577742228 | 0.678263430989  | -0.429288348424 |
| H | -4.474832810422 | -0.051417980861 | 0.122273277540  |
| H | -0.702788180523 | 1.611296360307  | -0.681710614899 |
| H | -2.903250751896 | 0.673797611333  | -1.981247904153 |

29

TS9 -802.995432

|   |                 |                 |                 |
|---|-----------------|-----------------|-----------------|
| C | -0.438777926561 | 1.071090397034  | 1.802161353240  |
| C | -1.120027032337 | -0.126236010734 | 1.099554979800  |
| C | 0.033364045044  | -1.062134972327 | 0.859801154102  |
| C | 1.103246442760  | -0.613456419544 | 1.662454115784  |
| C | 0.826524012626  | 0.615260791284  | 2.289633875072  |
| H | 2.033934698211  | -1.160342597408 | 1.758038454295  |
| O | -0.931056833796 | 2.245735017229  | 1.751392809470  |
| C | -0.060023916165 | -2.247223820206 | 0.082433716109  |
| H | -1.793951857465 | -0.603189459755 | 1.825734824447  |
| H | 1.510670380918  | 1.208859694132  | 2.877079782473  |
| O | 1.085136679696  | -3.039338113813 | 0.111125693877  |
| O | -1.042280078525 | -2.563964103723 | -0.649270833165 |
| C | 1.047609843976  | -4.260798795978 | -0.680216020121 |
| H | 2.019539342141  | -4.728853924356 | -0.526406869474 |
| H | 0.243419269701  | -4.916926935853 | -0.336731864162 |
| H | 0.887719136054  | -4.035631983588 | -1.738632353188 |
| C | -2.042776293958 | 0.354036945531  | -0.079058543664 |
| C | -1.539389389013 | 1.648246888812  | -0.588234771401 |
| C | -0.345029647065 | 1.713253144139  | -1.291191173559 |
| H | -2.100109324119 | 2.564016787702  | -0.440593385073 |
| H | -3.060158631003 | 0.476415513886  | 0.290340973928  |
| H | -2.023808516607 | -0.446185434614 | -0.830091148509 |
| O | 0.173571809974  | 2.973189947621  | -1.658895669407 |
| C | 1.372088660546  | 2.748314232740  | -2.253731600123 |
| C | 1.657983872989  | 1.391493736507  | -2.315483385118 |
| C | 0.566895191896  | 0.723722119603  | -1.709827574545 |
| H | 1.913213342565  | 3.618250162811  | -2.587392684900 |
| H | 0.421784812568  | -0.338392807241 | -1.596211860332 |
| H | 2.539360051613  | 0.946075180069  | -2.744173459102 |

29

TS10 -802.994603

|   |                 |                |                 |
|---|-----------------|----------------|-----------------|
| C | 0.486573320232  | 1.854846810542 | 0.297025633600  |
| C | 1.277802416243  | 0.735085034614 | -0.330125102753 |
| C | 0.463917215114  | 0.048872029125 | -1.160678345653 |
| C | -0.944590864432 | 0.603688078496 | -1.089496295035 |
| C | -0.878454731286 | 1.723351847064 | -0.231534019449 |
| H | -1.579945800248 | 0.573062475299 | -1.968099118380 |
| O | 0.947956540753  | 2.708837382489 | 1.088777874582  |



|   |                 |                 |                 |
|---|-----------------|-----------------|-----------------|
| C | 0.883613871353  | -1.089899405485 | -1.996675224914 |
| H | 2.323715874105  | 0.544031460545  | -0.134186435593 |
| H | -1.631953133687 | 2.489540663120  | -0.120266986211 |
| O | -0.144273670396 | -1.544527511011 | -2.791650622961 |
| O | 2.013925486160  | -1.594478662906 | -2.020284563527 |
| C | 0.164734949144  | -2.648199393887 | -3.700727986375 |
| H | -0.766103286340 | -2.851130112465 | -4.226855080360 |
| H | 0.951989940930  | -2.350604511300 | -4.397083930710 |
| H | 0.496211333875  | -3.522624852366 | -3.135658832821 |
| C | -1.932130003031 | -0.910716048117 | -0.237868166199 |
| C | -1.098850980116 | -1.285328792991 | 0.836122933403  |
| C | -0.933632434249 | -0.399221982988 | 1.902229269287  |
| H | -0.414665163170 | -2.121809312789 | 0.746708656432  |
| H | -2.027659583423 | -1.604171227634 | -1.068555866502 |
| H | -2.828033752295 | -0.330085303728 | -0.035941052627 |
| O | 0.153108773870  | -0.539946307023 | 2.784012651774  |
| C | 0.173145540962  | 0.586628196331  | 3.579227157012  |
| C | -0.862088882808 | 1.432310671582  | 3.265527303454  |
| C | -1.572787170214 | 0.822875091215  | 2.182211152083  |
| H | 0.967284418969  | 0.640299922317  | 4.303717495522  |
| H | -2.512888368542 | 1.146229656496  | 1.769522275540  |
| H | -1.064217346221 | 2.384890875378  | 3.723466739393  |

29

TS11 -802.994035

|   |                 |                 |                 |
|---|-----------------|-----------------|-----------------|
| C | 0.659114822390  | -0.495008663291 | -1.858164067024 |
| C | -0.366594669781 | -0.488421716879 | -0.714662509289 |
| C | 0.389498262400  | -0.701090624607 | 0.474417808415  |
| C | 1.812190388631  | -0.676082709949 | 0.136203615701  |
| C | 1.991935554154  | -0.485379060089 | -1.204031202566 |
| H | 2.588845061683  | -0.789307701107 | 0.880814765176  |
| O | 0.398466915645  | -0.514484963952 | -3.072238892345 |
| C | -0.172374898374 | -1.234429181430 | 1.708467507074  |
| H | -1.332268143300 | -0.962179669445 | -0.857232965585 |
| H | 2.923480662475  | -0.409844661704 | -1.745305053529 |
| O | 0.801631627476  | -1.446568632868 | 2.670739318193  |
| O | -1.370641506088 | -1.486275525533 | 1.920313062304  |
| C | 0.353843237794  | -2.033090764109 | 3.930003647381  |
| H | 1.254566378787  | -2.131325641995 | 4.533864635883  |
| H | -0.375594294482 | -1.381066429103 | 4.417746252538  |
| H | -0.105650292893 | -3.008641050907 | 3.752691160772  |
| C | -2.061412900344 | 1.638661700987  | -2.966841452918 |
| C | -2.139538693174 | 1.396533999270  | -1.648700249416 |
| C | -0.975495523674 | 1.341244144414  | -0.737702081097 |
| H | -3.090335683273 | 1.177907023242  | -1.170681263488 |
| H | -2.952456362541 | 1.625557311912  | -3.584469597118 |
| H | -1.118424704402 | 1.821776503021  | -3.471650649107 |

|   |                 |                |                 |
|---|-----------------|----------------|-----------------|
| O | -1.335036107126 | 1.399572035982 | 0.645386827180  |
| C | -0.167512446873 | 1.658513657019 | 1.308551922475  |
| C | 0.777236036754  | 2.226020015314 | 0.431496167004  |
| C | 0.266890021026  | 2.082510942222 | -0.853246050711 |
| H | -0.199778289945 | 1.609944078222 | 2.384717882151  |
| H | 0.719440883600  | 2.389022339639 | -1.782539447756 |
| H | 1.738664124899  | 2.619950550594 | 0.716451687360  |

29

TS12 -802.993724

|   |                 |                 |                 |
|---|-----------------|-----------------|-----------------|
| C | -0.382788486935 | 1.394392949704  | -0.612695418787 |
| C | -0.591860853232 | -0.079295706909 | -0.717682551569 |
| C | 0.508692067434  | -0.587835663271 | -1.398471271648 |
| C | 1.528166111267  | 0.406835980181  | -1.534737182716 |
| C | 1.110534842445  | 1.569413132904  | -0.880457685442 |
| H | 2.488195524114  | 0.232916494095  | -1.997628025413 |
| O | -1.210600753673 | 2.283093289244  | -0.372092712227 |
| C | 0.613400981611  | -1.991809890694 | -1.845107403071 |
| H | -1.522066859523 | -0.589035106271 | -0.512818657271 |
| H | 1.571551521676  | 2.545138339527  | -0.968303847423 |
| O | 1.802011249572  | -2.238403140222 | -2.484721513412 |
| O | -0.249860696487 | -2.863128770007 | -1.676249302210 |
| C | 2.008806434562  | -3.593657400414 | -2.993632516794 |
| H | 2.988786236291  | -3.572084063532 | -3.466152864393 |
| H | 1.984311190244  | -4.313422460160 | -2.171903803259 |
| H | 1.229902773722  | -3.846825424129 | -3.716748349023 |
| C | 1.347276708686  | 1.177813832934  | 1.186914432875  |
| C | 0.364174357792  | 0.233824523109  | 1.551854770428  |
| C | -0.850398739104 | 0.587511163646  | 2.246547835985  |
| H | 0.606083888948  | -0.822932674476 | 1.540482663971  |
| H | 2.373060468859  | 0.847741548808  | 1.086416260654  |
| H | 1.221847337196  | 2.213240151035  | 1.493405648947  |
| O | -1.673519953520 | -0.472519101167 | 2.633082783664  |
| C | -2.794174232075 | 0.075823032534  | 3.232820983651  |
| C | -2.704233510748 | 1.444264580654  | 3.231320958884  |
| C | -1.456026003001 | 1.777347937226  | 2.597816088197  |
| H | -3.527958081653 | -0.622288186582 | 3.595699062695  |
| H | -1.070338789815 | 2.766430278911  | 2.413979362205  |
| H | -3.433629418939 | 2.133448508514  | 3.623598573337  |

29

TS13 -802.993161

|   |                 |                |                 |
|---|-----------------|----------------|-----------------|
| C | -1.645885974933 | 1.838064356207 | -0.274487100592 |
| C | -0.466303074549 | 0.860789316534 | -0.041380765564 |
| C | 0.146039945977  | 1.291493957159 | 1.156326971678  |
| C | -0.650807546062 | 2.365963977164 | 1.738794801327  |
| C | -1.700459172893 | 2.700045924665 | 0.924270870546  |
| H | -0.408769537480 | 2.824668264420 | 2.688886002035  |

|   |                 |                 |                 |
|---|-----------------|-----------------|-----------------|
| O | -2.384814838528 | 1.836047912893  | -1.274119605718 |
| C | 1.313422715642  | 0.651015151025  | 1.686764685431  |
| H | 0.121214073277  | 0.506565122748  | -0.883508473815 |
| H | -2.458706696750 | 3.450154559076  | 1.089520760288  |
| O | 1.835559612301  | 1.266869946672  | 2.802784670547  |
| O | 1.822408736334  | -0.399395713090 | 1.211795097520  |
| C | 3.020435799413  | 0.656821275370  | 3.397039998918  |
| H | 3.259828390020  | 1.280529089498  | 4.256690264259  |
| H | 2.807385226663  | -0.369921354845 | 3.705703522036  |
| H | 3.843931599457  | 0.650072480710  | 2.678601245956  |
| C | -1.385465951046 | -0.815406862146 | 0.343207741992  |
| C | -1.604163953062 | -1.391059702321 | -0.916058371030 |
| C | -0.553908217862 | -2.039324204648 | -1.613813555623 |
| H | -2.540375719639 | -1.238439948814 | -1.443745760686 |
| H | -2.249510411141 | -0.456373505270 | 0.896129612389  |
| H | -0.583199094882 | -1.233723792110 | 0.945653564550  |
| O | -0.831126027375 | -2.618724770372 | -2.859918106751 |
| C | 0.352570362917  | -3.128401597199 | -3.338400290673 |
| C | 1.377640836608  | -2.883130601362 | -2.450383340415 |
| C | 0.807155913176  | -2.182923357125 | -1.341577541629 |
| H | 0.306903367187  | -3.621520470006 | -4.294180956763 |
| H | 1.315729898676  | -1.796422989464 | -0.466011506057 |
| H | 2.410472288087  | -3.161197060963 | -2.578442947845 |

29

TS14 -802.993023

|   |                 |                 |                 |
|---|-----------------|-----------------|-----------------|
| C | -2.553256126175 | -0.290597553647 | -0.036000381652 |
| C | -1.585519514065 | -1.414332464820 | -0.114461277555 |
| C | -0.458724693881 | -0.940125422941 | -0.739366185923 |
| C | -0.540441281088 | 0.484565717854  | -0.992331062184 |
| C | -1.757778693588 | 0.955955329190  | -0.447830059791 |
| H | 0.163159827159  | 1.037083145537  | -1.594471966684 |
| O | -3.747423128822 | -0.317457576452 | 0.300278054579  |
| C | 0.718187759369  | -1.782969123068 | -1.052807630428 |
| H | -1.778357692650 | -2.427689556084 | 0.204144957189  |
| H | -2.278494739196 | 1.825121463682  | -0.834263297763 |
| O | 1.693895724419  | -1.071189493395 | -1.698261232094 |
| O | 0.839830930371  | -2.981547519835 | -0.767294970538 |
| C | 2.908285782312  | -1.794922494446 | -2.069103631314 |
| H | 3.556420440988  | -1.046659353337 | -2.520625227083 |
| H | 3.372336935884  | -2.235014596188 | -1.182917544666 |
| H | 2.668737554369  | -2.588664578587 | -2.780697552986 |
| C | 3.249295812468  | 1.267061125894  | 0.545870942291  |
| C | 2.114431007834  | 1.994639898105  | 0.564735461450  |
| C | 0.836932145392  | 1.513050843542  | 1.064993347191  |
| H | 2.101450834505  | 3.008605528177  | 0.174986112397  |
| H | 4.171219420439  | 1.685415570296  | 0.157979684620  |

|   |                 |                 |                |
|---|-----------------|-----------------|----------------|
| H | 3.285303241298  | 0.243031758978  | 0.906486650086 |
| O | -0.232400100006 | 2.396001057051  | 0.989684887433 |
| C | -1.373089609799 | 1.624013113866  | 1.326238205767 |
| C | -0.906235872609 | 0.488426153795  | 2.080235282383 |
| C | 0.469122864658  | 0.402885876806  | 1.845334083703 |
| H | -2.255953393103 | 2.206072477404  | 1.550863340747 |
| H | 1.135556586413  | -0.383245666060 | 2.162425637118 |
| H | -1.522132826749 | -0.175802181019 | 2.663468184471 |

29

TS15 -802.992819

|   |                 |                 |                 |
|---|-----------------|-----------------|-----------------|
| C | 1.197103414197  | -0.593046474425 | -2.038566707991 |
| C | 0.470343897008  | 0.225929492978  | -0.945580985196 |
| C | -0.732291846500 | -0.477535535800 | -0.690656783720 |
| C | -0.692000805031 | -1.756334078765 | -1.407737767149 |
| C | 0.444777782018  | -1.864805938348 | -2.158117001674 |
| H | -1.483619814656 | -2.490789818194 | -1.333747211800 |
| O | 2.207235228655  | -0.226069082269 | -2.659108999379 |
| C | -1.883700912151 | 0.138173760461  | -0.068293146959 |
| H | 0.495053406375  | 1.309874559178  | -0.973296475846 |
| H | 0.753913205965  | -2.686910758863 | -2.785795274547 |
| O | -3.008958560077 | -0.667202910309 | -0.105896590527 |
| O | -1.898255574195 | 1.272916925903  | 0.451122101476  |
| C | -4.220094191769 | -0.116323682800 | 0.491298757947  |
| H | -4.981097508140 | -0.882496833805 | 0.350602447170  |
| H | -4.062333571714 | 0.087489351648  | 1.554109374457  |
| H | -4.504185582143 | 0.812416646606  | -0.009592680017 |
| C | -0.360623937123 | -1.489122887749 | 1.829900960405  |
| C | 0.132701094771  | -0.304400465966 | 2.311222693563  |
| C | 1.213704040232  | 0.323828897806  | 1.657920992993  |
| H | -0.368502967445 | 0.237283464012  | 3.104515123093  |
| H | -1.269508949444 | -1.920137614296 | 2.235288330767  |
| H | 0.190002205831  | -2.101318251260 | 1.125125512687  |
| O | 1.702679280417  | 1.537760653434  | 2.087390898365  |
| C | 2.723103924733  | 1.915166318736  | 1.194506620410  |
| C | 2.876153191656  | 0.989557135024  | 0.216979227288  |
| C | 1.843424199555  | -0.040538329060 | 0.429336856529  |
| H | 3.206097045623  | 2.850224299004  | 1.417610327728  |
| H | 2.018400063157  | -1.085643299468 | 0.186068193574  |
| H | 3.560941457520  | 1.020829560179  | -0.614317858180 |

29

TS16 -802.991842

|   |                 |                 |                 |
|---|-----------------|-----------------|-----------------|
| C | 0.404968908584  | -0.641562708319 | -1.152304497806 |
| C | -0.306872895632 | -0.812535998994 | 0.205609240065  |
| C | -1.675422288959 | -0.982741883520 | -0.107392349929 |
| C | -1.862516295699 | -0.749671323482 | -1.521964386864 |
| C | -0.657564345495 | -0.518408491378 | -2.151756616716 |

|   |                 |                 |                 |
|---|-----------------|-----------------|-----------------|
| H | -2.835317253347 | -0.771543941030 | -1.995897118296 |
| O | 1.646987382888  | -0.600359423820 | -1.308262670793 |
| C | -2.690359342987 | -1.229203985860 | 0.887914463534  |
| H | 0.178239979270  | -1.318786982871 | 1.031036203391  |
| H | -0.484637431969 | -0.331244039125 | -3.200896595920 |
| O | -3.941401798977 | -1.444991841513 | 0.344815986645  |
| O | -2.495515117019 | -1.228242156650 | 2.123768261813  |
| C | -5.026520740991 | -1.702204511034 | 1.285524685618  |
| H | -5.917846064314 | -1.809693654281 | 0.669402749281  |
| H | -4.829874483677 | -2.617893124400 | 1.848927902945  |
| H | -5.132208001841 | -0.869217169632 | 1.985397245773  |
| C | -0.160133879565 | 1.041613105075  | 0.869195163548  |
| C | 1.170690420457  | 1.271666220375  | 1.248765717277  |
| C | 2.195483835309  | 1.706139892663  | 0.382916855982  |
| H | 1.479325584382  | 1.024158100518  | 2.261201166736  |
| H | -0.879393516325 | 0.913514284412  | 1.673498366710  |
| H | -0.539478358936 | 1.532225808405  | -0.026438414932 |
| O | 3.490255287512  | 1.802455284430  | 0.917407040183  |
| C | 4.320687153774  | 2.205042888203  | -0.099402003208 |
| C | 3.611051624280  | 2.372032168466  | -1.267590231452 |
| C | 2.253217981913  | 2.047656528653  | -0.969802552970 |
| H | 5.360323918935  | 2.325910529128  | 0.152262410104  |
| H | 1.421379186889  | 2.065711921021  | -1.654181165602 |
| H | 4.013427726674  | 2.668758279356  | -2.221376176759 |

29

TS17 -802.991773

|   |                 |                 |                 |
|---|-----------------|-----------------|-----------------|
| C | 1.571844797864  | 1.033572872321  | 1.998277203062  |
| C | 0.603127811779  | 0.687061238508  | 0.839296312342  |
| C | -0.659703015251 | 0.557288698470  | 1.439518076769  |
| C | -0.513249145349 | 0.649020752019  | 2.895262810440  |
| C | 0.780253977622  | 0.922844954567  | 3.242494461522  |
| H | -1.345124652685 | 0.515034908334  | 3.574564661797  |
| O | 2.767978651676  | 1.332779774952  | 1.849057711089  |
| C | -1.822766922245 | 0.207102227353  | 0.681496186384  |
| H | 0.756327899249  | 1.130474694200  | -0.141134171429 |
| H | 1.196651319104  | 1.040262873739  | 4.231220926755  |
| O | -2.975979179994 | 0.096130048118  | 1.432506826940  |
| O | -1.801488802554 | -0.038332930588 | -0.551371592144 |
| C | -4.190145070868 | -0.277814650306 | 0.715178086712  |
| H | -4.972246038916 | -0.297077839396 | 1.472348554365  |
| H | -4.415783517522 | 0.458592676760  | -0.060386173577 |
| H | -4.072662643919 | -1.260248117634 | 0.250385218666  |
| C | 1.315801649173  | -1.097370730659 | 0.305417347043  |
| C | 0.641654738785  | -1.421924375980 | -0.874303460796 |
| C | 0.994209358123  | -0.848627585040 | -2.131054508839 |
| H | -0.228459597691 | -2.068002149667 | -0.864908264262 |

|   |                |                 |                 |
|---|----------------|-----------------|-----------------|
| H | 1.096396018128 | -1.672477431194 | 1.200092104739  |
| H | 2.338433956280 | -0.731840016083 | 0.236476016876  |
| O | 0.249107993264 | -1.222158962354 | -3.250766794863 |
| C | 0.732287975273 | -0.507528351070 | -4.322172613725 |
| C | 1.763784005033 | 0.312090314380  | -3.923515734956 |
| C | 1.937363131842 | 0.095556976447  | -2.518547739013 |
| H | 0.254804021446 | -0.686099544404 | -5.269809618431 |
| H | 2.665206778115 | 0.566510459218  | -1.875916550865 |
| H | 2.325763526356 | 0.982641627959  | -4.552055445740 |

29

TS18 -802.991707

|   |                 |                 |                 |
|---|-----------------|-----------------|-----------------|
| C | 1.990923437855  | -0.190875298414 | 0.492695838049  |
| C | 0.606056869901  | -0.781198877431 | 0.111654253790  |
| C | 0.215894243508  | 0.032383637216  | -1.058544049945 |
| C | 1.018684155053  | 1.179147692201  | -1.109278722010 |
| C | 1.935732339203  | 1.180475718621  | -0.043454976835 |
| H | 0.895359355320  | 1.967115107896  | -1.839600550678 |
| O | 2.878473211557  | -0.748386293028 | 1.154584831226  |
| C | -0.795825147509 | -0.380202723461 | -2.020202953676 |
| H | 0.520638547883  | -1.860924756102 | 0.017024092762  |
| H | 2.689891426701  | 1.929030195749  | 0.156031528714  |
| O | -0.992950391367 | 0.562142250247  | -3.013486093373 |
| O | -1.424949252342 | -1.451889958190 | -1.993261851586 |
| C | -1.951541681656 | 0.213309430985  | -4.057367081642 |
| H | -1.948679325752 | 1.060336993594  | -4.741518592726 |
| H | -1.641512631990 | -0.701891053464 | -4.567948842366 |
| H | -2.944741502438 | 0.060577043558  | -3.626804727976 |
| C | 0.806266793881  | -1.386371540435 | 3.500165526271  |
| C | -0.123378791546 | -1.355395651291 | 2.535197333564  |
| C | -0.226562676552 | -0.314239469754 | 1.458450428106  |
| H | -0.870113399430 | -2.140037192082 | 2.448826923715  |
| H | 0.832328200884  | -2.202894848545 | 4.213334473735  |
| H | 1.583102275035  | -0.634389404005 | 3.593314215392  |
| O | -1.632285307020 | -0.232899386260 | 1.020490759015  |
| C | -1.847970393044 | 1.075490246598  | 0.708911431465  |
| C | -0.874895938096 | 1.919424492323  | 1.222893786632  |
| C | 0.156695187040  | 1.112069752519  | 1.743429196954  |
| H | -2.784332654854 | 1.300868131429  | 0.222409130107  |
| H | 0.915344189982  | 1.410516857236  | 2.450096023812  |
| H | -0.897260742988 | 2.995906382737  | 1.181939665053  |

29

TS19 -802.991496

|   |                 |                 |                 |
|---|-----------------|-----------------|-----------------|
| C | -0.199761094552 | 0.065356158208  | -2.172639005990 |
| C | -0.484322577087 | 0.490626722749  | -0.721952464314 |
| C | -0.748924461472 | -0.722764148060 | -0.028228745783 |
| C | -0.528233571988 | -1.859805782484 | -0.948185225183 |

|   |                 |                 |                 |
|---|-----------------|-----------------|-----------------|
| C | -0.166111693033 | -1.420492541400 | -2.180029520356 |
| H | -0.647916665291 | -2.888583644107 | -0.635329757174 |
| O | -0.067355267879 | 0.832478249698  | -3.138358231592 |
| C | -1.554476341690 | -0.782697357737 | 1.181408134624  |
| H | -1.045457685673 | 1.400605151963  | -0.544446814700 |
| H | 0.095227583999  | -2.004232412133 | -3.049800919674 |
| O | -1.831064839232 | -2.080839639661 | 1.566045007730  |
| O | -1.949924648125 | 0.198013609910  | 1.839629139256  |
| C | -2.654196001239 | -2.246633166258 | 2.759904466922  |
| H | -2.770573244860 | -3.322574180301 | 2.878571485332  |
| H | -2.157860649734 | -1.809064925690 | 3.630141618030  |
| H | -3.623744966849 | -1.761652553347 | 2.622590338080  |
| C | 1.878518986758  | 3.390584686246  | -0.976345751205 |
| C | 1.847328053464  | 2.056786308358  | -1.131074250428 |
| C | 1.318988763852  | 1.120930681071  | -0.118716057202 |
| H | 2.188667407654  | 1.601400576757  | -2.054618084193 |
| H | 2.240873772719  | 4.029652564770  | -1.773377734007 |
| H | 1.541253382875  | 3.883751585443  | -0.068967514470 |
| O | 1.890302800302  | -0.185179786642 | -0.152587085623 |
| C | 1.473703732743  | -0.786061437670 | 1.006303113539  |
| C | 1.123089859524  | 0.203501295058  | 1.957290755564  |
| C | 1.042560782392  | 1.401485004100  | 1.270148471160  |
| H | 1.706657973336  | -1.831752324522 | 1.122007371409  |
| H | 0.705718292208  | 2.350313920542  | 1.654604333864  |
| H | 0.862030820413  | 0.020617564829  | 2.986153797423  |

29

TS20 -802.991365

|   |                 |                 |                 |
|---|-----------------|-----------------|-----------------|
| C | -0.989264718763 | -1.187150969936 | 1.403493877254  |
| C | 0.096822958312  | -0.254822884534 | 1.888870294258  |
| C | 0.039274818372  | 0.874684837401  | 1.149732492709  |
| C | -1.025622673533 | 0.762934019942  | 0.083908016792  |
| C | -1.646048904209 | -0.492332101869 | 0.275453368381  |
| H | -1.558053966997 | 1.648340937176  | -0.241493900637 |
| O | -1.260409043664 | -2.303683824968 | 1.889140470604  |
| C | 0.940657042626  | 2.031023178149  | 1.310249159236  |
| H | 0.787892377853  | -0.480507370142 | 2.689119044506  |
| H | -2.624029190012 | -0.776539808453 | -0.082940622422 |
| O | 0.721638786928  | 2.977423606288  | 0.335860308666  |
| O | 1.801371049528  | 2.166369504633  | 2.189388421203  |
| C | 1.537079203534  | 4.190578756857  | 0.402778757422  |
| H | 1.192937591710  | 4.811369632718  | -0.422302164975 |
| H | 1.384549035721  | 4.691764375579  | 1.361443977049  |
| H | 2.595074626707  | 3.940615673413  | 0.292202177627  |
| C | -1.538951574028 | -3.858032855414 | -1.315585044587 |
| C | -1.621388838691 | -2.652142440437 | -1.911059126714 |
| C | -0.715188214147 | -1.547669660100 | -1.622850892404 |

|   |                 |                 |                 |
|---|-----------------|-----------------|-----------------|
| H | -2.413688877585 | -2.429885973133 | -2.620231872742 |
| H | -2.252701142301 | -4.640960838675 | -1.545766561168 |
| H | -0.787824222773 | -4.082448159643 | -0.564598722600 |
| O | -0.977528306588 | -0.329280693770 | -2.240401193331 |
| C | -0.034510979429 | 0.557612961119  | -1.677865830404 |
| C | 1.089766593427  | -0.229679307340 | -1.267160552251 |
| C | 0.638376499883  | -1.537417503849 | -1.171365516706 |
| H | -0.017888445802 | 1.544627419503  | -2.114169805099 |
| H | 1.168136992213  | -2.396645434907 | -0.792602875123 |
| H | 2.049814417544  | 0.158856084411  | -0.967454665798 |

29

TS21 -802.989118

|   |                 |                 |                 |
|---|-----------------|-----------------|-----------------|
| C | -0.470076217809 | -1.762224540396 | 0.779269578421  |
| C | 0.229907207136  | -0.804824382480 | -0.220696568193 |
| C | 1.147824355221  | 0.010430390600  | 0.646476760853  |
| C | 1.189072561699  | -0.622100691842 | 1.907048974713  |
| C | 0.277269377328  | -1.685918243751 | 2.002298095230  |
| H | 1.846332007768  | -0.297102368287 | 2.705408515765  |
| O | -1.535565800916 | -2.377131527509 | 0.481052463138  |
| C | 1.836420751255  | 1.141461997120  | 0.155358214321  |
| H | 0.837795667502  | -1.425834239673 | -0.893426246679 |
| H | 0.076369714742  | -2.284834503978 | 2.878126183196  |
| O | 2.725001561085  | 1.726766197282  | 1.045212381805  |
| O | 1.635834765597  | 1.656930126589  | -0.993213636594 |
| C | 3.431338739538  | 2.910927866556  | 0.575583166245  |
| H | 4.095370523700  | 3.188027820491  | 1.393763182517  |
| H | 4.002203552589  | 2.684494605091  | -0.328689659614 |
| H | 2.728422479157  | 3.719241178169  | 0.354953957208  |
| C | -1.649920621734 | 1.515743944038  | 1.438160532355  |
| C | -2.523563378637 | 0.830055144276  | 0.662030989247  |
| C | -2.117108149228 | 0.181676694954  | -0.551531330167 |
| H | -3.571066067840 | 0.734518396763  | 0.923791666328  |
| H | -1.983068918009 | 1.974379002639  | 2.362936154865  |
| H | -0.598312799006 | 1.612964877274  | 1.181334877487  |
| O | -3.074513473741 | -0.284061868109 | -1.348764549397 |
| C | -2.467304849456 | -0.890407020649 | -2.501318104278 |
| C | -1.136398568224 | -0.765298343562 | -2.419568489596 |
| C | -0.777423330709 | -0.043369052858 | -1.148544842070 |
| H | -3.162639445114 | -1.334601173045 | -3.189713996252 |
| H | -0.235795599106 | 0.907312359447  | -1.362191307438 |
| H | -0.409894222456 | -1.121141635522 | -3.132322134746 |

29

TS22 -802.988944

|   |                 |                 |                 |
|---|-----------------|-----------------|-----------------|
| C | 1.084308241041  | -1.746709440911 | -0.165279978659 |
| C | 0.412976166189  | -0.781613541295 | 0.843189921527  |
| C | -0.938994434274 | -0.673037448902 | 0.399979511348  |



|   |                 |                 |                 |
|---|-----------------|-----------------|-----------------|
| C | -1.047569053821 | -1.269616535796 | -0.895657271823 |
| C | 0.152050259652  | -1.849661327714 | -1.280817813495 |
| H | -1.960333244933 | -1.255426256791 | -1.476707751347 |
| O | 2.218770555312  | -2.249782980318 | -0.019386679492 |
| C | -1.979802067533 | -0.022340288863 | 1.158455246787  |
| H | 0.649025042947  | -0.847201721732 | 1.901371777025  |
| H | 0.368369526245  | -2.368028807538 | -2.202568928769 |
| O | -3.216141122473 | -0.092957347627 | 0.545866305934  |
| O | -1.820246552437 | 0.563348354298  | 2.251874951924  |
| C | -4.333767108430 | 0.517299465909  | 1.256793761903  |
| H | -5.202360083453 | 0.343102413799  | 0.623655151671  |
| H | -4.464118740557 | 0.048136906724  | 2.235297349221  |
| H | -4.160409519281 | 1.587669237392  | 1.396161929951  |
| C | 3.628678176571  | -0.393824918218 | -1.576941085404 |
| C | 2.518527399631  | 0.297469597174  | -1.937872639812 |
| C | 1.568645836369  | 0.828533697544  | -1.000419065655 |
| H | 2.295212488784  | 0.487446172169  | -2.982890103624 |
| H | 4.298065198478  | -0.790032622706 | -2.332039615403 |
| H | 3.891974013513  | -0.580255224014 | -0.542837863524 |
| O | 0.634608412030  | 1.710558528088  | -1.475401329163 |
| C | 0.052326967455  | 2.367059068531  | -0.360283426415 |
| C | 0.578891650429  | 1.900824466508  | 0.791371066747  |
| C | 1.451499505117  | 0.757355554101  | 0.437652967675  |
| H | -0.688010484091 | 3.107681608168  | -0.604245286562 |
| H | 2.322760822992  | 0.493159750930  | 1.025685577373  |
| H | 0.289299653736  | 2.180085791047  | 1.790069230540  |

29

TS23 -802.988379

|   |                 |                 |                 |
|---|-----------------|-----------------|-----------------|
| C | -1.650954824849 | 1.196297316527  | -0.231903094950 |
| C | -0.778706683099 | 1.042658522613  | -1.458710481109 |
| C | -0.279860082813 | -0.210224678132 | -1.461966164134 |
| C | -0.707957567084 | -0.958566382930 | -0.213702139014 |
| C | -1.554484355821 | -0.078880055666 | 0.504857702858  |
| H | -0.861524002452 | -2.029198890911 | -0.270165935275 |
| O | -2.327285540850 | 2.205887320995  | 0.048863890914  |
| C | 0.594923994303  | -0.756391746735 | -2.515448837564 |
| H | -0.608416188678 | 1.819013261970  | -2.191450186309 |
| H | -2.263624991640 | -0.352740035750 | 1.270761657566  |
| O | 1.041718085120  | -2.021701797816 | -2.200108911046 |
| O | 0.908167163524  | -0.186097951238 | -3.567706355547 |
| C | 1.891312073351  | -2.685087205302 | -3.189438422841 |
| H | 2.108803390794  | -3.663654680900 | -2.765580601306 |
| H | 1.359728677689  | -2.778393804631 | -4.139157904309 |
| H | 2.807867884822  | -2.111276991596 | -3.345554684313 |
| C | -0.706410108032 | 2.462288531963  | 3.491874837496  |
| C | -0.031390432498 | 2.045937754519  | 2.403546716810  |

|   |                 |                 |                |
|---|-----------------|-----------------|----------------|
| C | 0.214936491647  | 0.649624680217  | 2.076990237352 |
| H | 0.332259387785  | 2.762039564647  | 1.673061406072 |
| H | -0.889369659525 | 3.517109726544  | 3.659699309118 |
| H | -1.106098932740 | 1.771075623606  | 4.228727639000 |
| O | 1.072493985226  | 0.396837090256  | 1.021134695883 |
| C | 1.006551535840  | -0.993856878242 | 0.815030360659 |
| C | 0.603407933002  | -1.578896900653 | 2.062841047875 |
| C | 0.057118561817  | -0.557014991606 | 2.821911566951 |
| H | 1.723581776223  | -1.385421475148 | 0.108143707241 |
| H | -0.447083552098 | -0.637657999070 | 3.771600697175 |
| H | 0.609532506982  | -2.634589622895 | 2.283447408326 |

29

TS24 -802.988312

|   |                 |                 |                 |
|---|-----------------|-----------------|-----------------|
| C | -1.739227702533 | -0.305343232232 | -1.756469426703 |
| C | -1.254245461471 | 0.040506597702  | -0.319854492766 |
| C | -0.408487392486 | -1.149297211411 | 0.064030958969  |
| C | -0.642749826120 | -2.141168429194 | -0.892221254990 |
| C | -1.444584186000 | -1.682364756592 | -1.966633796013 |
| H | -0.217218310164 | -3.135494838656 | -0.822215816213 |
| O | -2.211771994038 | 0.601616447029  | -2.512699488078 |
| C | 0.465559430565  | -1.161090148854 | 1.178801957938  |
| H | -2.159825432977 | 0.051319269970  | 0.303945968015  |
| H | -1.721883203786 | -2.244845844647 | -2.845795560480 |
| O | 1.042215812538  | -2.389580466446 | 1.457848991369  |
| O | 0.765528532107  | -0.135131315378 | 1.862451456463  |
| C | 1.996940149872  | -2.426612805646 | 2.556345506928  |
| H | 2.348186891934  | -3.457368472851 | 2.592109795975  |
| H | 2.827190185009  | -1.738798348654 | 2.372007855742  |
| H | 1.511991544641  | -2.150190148414 | 3.496233336516  |
| C | 1.409583706117  | 0.472179333750  | -2.381765753540 |
| C | 1.766155551907  | 1.056275843312  | -1.211683413944 |
| C | 0.793464789637  | 1.603972750815  | -0.309278013469 |
| H | 2.803827445009  | 1.157066967544  | -0.914354238451 |
| H | 2.168825554365  | 0.071159131127  | -3.044665292361 |
| H | 0.378171820091  | 0.392382084731  | -2.712811228814 |
| O | 1.216743207118  | 2.421114148875  | 0.643759577121  |
| C | 0.088762438132  | 2.853088530723  | 1.423203051599  |
| C | -1.032522198052 | 2.333858266796  | 0.907761791373  |
| C | -0.687872683576 | 1.490955486849  | -0.289984184841 |
| H | 0.340894663256  | 3.470714516058  | 2.265186103077  |
| H | -1.126008816613 | 1.923535032883  | -1.224567647000 |
| H | -2.035903099891 | 2.472622111755  | 1.276988165816  |

29

TS25 -802.988189

|   |                |                |                |
|---|----------------|----------------|----------------|
| C | 0.306363457420 | 1.946202583373 | 0.170674759924 |
| C | 0.202473146550 | 0.437719543742 | 0.526432209816 |

|   |                 |                 |                 |
|---|-----------------|-----------------|-----------------|
| C | 1.434653716505  | -0.132301266935 | 0.108311406476  |
| C | 2.210255416185  | 0.882235232114  | -0.573995205776 |
| C | 1.566561532835  | 2.099137211782  | -0.565055835546 |
| H | 3.176229766228  | 0.680080503882  | -1.019566616631 |
| O | -0.552732368523 | 2.796131076139  | 0.473953048593  |
| C | 1.692806048848  | -1.528947457053 | 0.270585256827  |
| H | -0.259770819821 | 0.155488650506  | 1.470748624193  |
| H | 1.905973202036  | 3.030106824794  | -0.992714523548 |
| O | 2.954684748097  | -1.928951814395 | -0.112715417267 |
| O | 0.833961836781  | -2.351584305109 | 0.693607385281  |
| C | 3.262300548739  | -3.348772729356 | 0.020967779391  |
| H | 4.291975523867  | -3.449000314716 | -0.318902709540 |
| H | 3.163289120343  | -3.663142445748 | 1.062994804344  |
| H | 2.587537484906  | -3.946724407936 | -0.597350392769 |
| C | -2.544093845999 | -1.047428211585 | 2.047234009726  |
| C | -3.020452921004 | -0.078726415390 | 1.225862892027  |
| C | -2.387416868635 | 0.243312744246  | -0.023602784543 |
| H | -3.892364095605 | 0.509269580345  | 1.491839162582  |
| H | -3.032005584489 | -1.255369317631 | 2.993017611510  |
| H | -1.677772080595 | -1.655631915618 | 1.794488140914  |
| O | -2.920889192471 | 1.220616438479  | -0.804274467297 |
| C | -2.127491412805 | 1.334579601065  | -1.961668657327 |
| C | -1.095530218488 | 0.455558327612  | -1.905860849532 |
| C | -1.174305241063 | -0.237182872949 | -0.605320794285 |
| H | -2.443959751842 | 2.082548488875  | -2.665570226101 |
| H | -0.874582006610 | -1.273519039109 | -0.458650052179 |
| H | -0.319195873270 | 0.323851380717  | -2.640569775519 |

29

TS26 -802.988176

|   |                 |                 |                 |
|---|-----------------|-----------------|-----------------|
| C | 0.379573051688  | -1.971227860454 | 0.370845603342  |
| C | 0.364746245240  | -0.514457737705 | 0.866788230254  |
| C | -0.995230145918 | -0.117923303991 | 0.832395849626  |
| C | -1.744659712536 | -1.107876435579 | 0.121501444028  |
| C | -0.936255364480 | -2.179459068070 | -0.235295375642 |
| H | -2.799820288078 | -1.007995878397 | -0.095998713439 |
| O | 1.359346627780  | -2.743781166347 | 0.452380854422  |
| C | -1.500088927173 | 1.112287229281  | 1.416535916975  |
| H | 1.066875147134  | -0.171920141772 | 1.619302424209  |
| H | -1.228918357342 | -3.081932522440 | -0.751151936957 |
| O | -2.859577090565 | 1.262549120374  | 1.228898693005  |
| O | -0.823310143108 | 1.957616277127  | 2.032582681567  |
| C | -3.469583503139 | 2.456961280304  | 1.803717023849  |
| H | -4.531153583134 | 2.370764629444  | 1.577649432867  |
| H | -3.300842535953 | 2.488987353384  | 2.882969534477  |
| H | -3.044085939305 | 3.355813656177  | 1.349895165446  |
| C | 0.430934220763  | 2.455153697947  | -1.359181151933 |

|   |                 |                 |                 |
|---|-----------------|-----------------|-----------------|
| C | 1.113265565762  | 1.668019413041  | -0.512536589076 |
| C | 1.280969256196  | 0.204704058557  | -0.695369452351 |
| H | 1.542257991576  | 2.074972561639  | 0.397684295968  |
| H | 0.299957113190  | 3.509467456149  | -1.142913657626 |
| H | -0.016022348100 | 2.079822877995  | -2.274895511744 |
| O | 2.624059022460  | -0.242263398255 | -0.425588378783 |
| C | 2.886555758913  | -1.290386650902 | -1.253236588401 |
| C | 1.870400203896  | -1.468493493313 | -2.181320750548 |
| C | 0.848261810029  | -0.559256768369 | -1.844532709692 |
| H | 3.812791080350  | -1.813702507163 | -1.088435896201 |
| H | -0.086881377880 | -0.410671336228 | -2.358037021626 |
| H | 1.843054832731  | -2.225213777767 | -2.946566162384 |

29

TS27 -802.987840

|   |                 |                 |                 |
|---|-----------------|-----------------|-----------------|
| C | 1.388030191815  | 2.017483162808  | 0.592767071787  |
| C | 0.174975574852  | 2.078900251183  | -0.275381745452 |
| C | -0.624106384993 | 1.036129789112  | 0.072015479877  |
| C | 0.001978858676  | 0.185257460181  | 1.103589166437  |
| C | 1.270807658948  | 0.727112401980  | 1.408795772277  |
| H | -0.561089877108 | -0.518431831237 | 1.695884155822  |
| O | 2.316283031678  | 2.836673607448  | 0.654465746241  |
| C | -1.945714919607 | 0.763540927178  | -0.537068212449 |
| H | -0.001005747328 | 2.819153061193  | -1.041140449220 |
| H | 1.725761734656  | 0.695002622386  | 2.391251727553  |
| O | -2.656036473903 | -0.150548594714 | 0.192953126863  |
| O | -2.383120519970 | 1.285353312965  | -1.571226212211 |
| C | -3.966080953655 | -0.533881407046 | -0.327582205036 |
| H | -4.361161257309 | -1.246039119047 | 0.394187533531  |
| H | -4.612165545908 | 0.343476846757  | -0.409193751719 |
| H | -3.853944288081 | -0.993563289637 | -1.312927460567 |
| C | -1.004888880474 | -2.681357537618 | -1.559538377822 |
| C | -0.093550124831 | -1.689517959895 | -1.553799270629 |
| C | 0.889910351293  | -1.466204744504 | -0.500183713944 |
| H | -0.062398878813 | -0.965482667457 | -2.363983518752 |
| H | -1.711184292516 | -2.779615249581 | -2.376498529027 |
| H | -1.072874116902 | -3.412547354772 | -0.759044618231 |
| O | 1.845090481803  | -0.492594129046 | -0.759433656345 |
| C | 2.602529653728  | -0.399213577436 | 0.421039103606  |
| C | 2.481158270864  | -1.658345885166 | 1.100943479032  |
| C | 1.371554439902  | -2.288785521620 | 0.558089620968  |
| H | 3.474209286361  | 0.236201248908  | 0.350761564308  |
| H | 0.911599460883  | -3.208307827492 | 0.883940773340  |
| H | 3.062524737218  | -1.962186309798 | 1.956708811004  |

29

TS28 -802.987349

|   |                |                 |                 |
|---|----------------|-----------------|-----------------|
| C | 0.239771363149 | -0.448614993643 | -1.847190744602 |
|---|----------------|-----------------|-----------------|

|   |                 |                 |                 |
|---|-----------------|-----------------|-----------------|
| C | 0.816539939213  | -1.007394840256 | -0.502909532568 |
| C | -0.296635600585 | -1.806204305227 | 0.040979703650  |
| C | -1.445592172756 | -1.617253827805 | -0.773332303271 |
| C | -1.167790575930 | -0.818309988839 | -1.876739742486 |
| H | -2.404406020064 | -2.066816797433 | -0.546975130218 |
| O | 0.918945255068  | 0.151903979825  | -2.715739372900 |
| C | -0.180275677428 | -2.541445679593 | 1.265118034958  |
| H | 1.755079167909  | -1.537787587339 | -0.669828579125 |
| H | -1.847157381504 | -0.539713731887 | -2.668933096917 |
| O | -1.330772300551 | -3.233239837012 | 1.611997378991  |
| O | 0.844895027163  | -2.564116313897 | 1.992788265568  |
| C | -1.267790381746 | -4.026587876717 | 2.832598813310  |
| H | -2.250102886043 | -4.488424037852 | 2.923187722298  |
| H | -0.486636993789 | -4.787417021921 | 2.754404653262  |
| H | -1.055613641028 | -3.389663069180 | 3.695736205481  |
| C | 1.139854439223  | 0.170075720911  | 0.585134106697  |
| C | 1.401434726761  | 1.412149006049  | -0.117595642582 |
| C | 0.610596020217  | 2.554512849413  | 0.005597537578  |
| H | 2.189676841145  | 1.439046674226  | -0.865514017114 |
| H | 1.996369710598  | -0.224292081618 | 1.139811400812  |
| H | 0.302941265162  | 0.246235718419  | 1.280684538542  |
| O | 0.922869242016  | 3.665309435262  | -0.801852721382 |
| C | 0.008797184675  | 4.639222725088  | -0.526271619464 |
| C | -0.892306798932 | 4.208684776122  | 0.434343236427  |
| C | -0.514512932131 | 2.885800894341  | 0.779846228918  |
| H | 0.113578909365  | 5.564194364974  | -1.067467660456 |
| H | -0.999569472298 | 2.236472515352  | 1.490980173051  |
| H | -1.717002449469 | 4.776475347487  | 0.831083037315  |

29

TS29 -802.987151

|   |                 |                 |                 |
|---|-----------------|-----------------|-----------------|
| C | 2.097526220806  | -1.472052252126 | 1.807393562775  |
| C | 1.263072416323  | -0.719355836451 | 0.717598922589  |
| C | 0.939195040890  | 0.589439202031  | 1.363598895087  |
| C | 1.580751713348  | 0.621305226588  | 2.626896618208  |
| C | 2.284352669004  | -0.551414675395 | 2.901050295737  |
| H | 1.511064526554  | 1.473755451998  | 3.291993636883  |
| O | 2.451732912813  | -2.671122943139 | 1.670346757814  |
| C | 0.092370638788  | 1.580799103744  | 0.805128955540  |
| H | 1.912431677927  | -0.604895419387 | -0.158090309961 |
| H | 2.811542812968  | -0.793332863467 | 3.812090920171  |
| O | 0.032578238723  | 2.755811031723  | 1.549947181354  |
| O | -0.609957570506 | 1.453483716076  | -0.241396539498 |
| C | -0.862154774280 | 3.792115826240  | 1.062862645293  |
| H | -0.728204121491 | 4.628157713431  | 1.748823139448  |
| H | -0.599980671807 | 4.082246761846  | 0.041676141506  |
| H | -1.900901152083 | 3.447468515832  | 1.075807753114  |

|   |                 |                 |                 |
|---|-----------------|-----------------|-----------------|
| C | 0.015712000171  | -1.616603374134 | 0.315334123018  |
| C | -0.219880335168 | -1.563099493353 | -1.126478795957 |
| C | -1.347056412067 | -1.100838234417 | -1.778338764216 |
| H | 0.584003752917  | -1.928807988985 | -1.765548640299 |
| H | 0.348414703890  | -2.637584034243 | 0.566550308729  |
| H | -0.852494904544 | -1.344055512951 | 0.915106743954  |
| O | -1.382297926957 | -1.211580010805 | -3.190991981259 |
| C | -2.554330111042 | -0.668903221389 | -3.604409471321 |
| C | -3.294590003468 | -0.195514940507 | -2.526782147798 |
| C | -2.531632916020 | -0.460420373327 | -1.369829705149 |
| H | -2.741821737540 | -0.677001325787 | -4.665445705145 |
| H | -2.752033386552 | -0.173352814776 | -0.355363730959 |
| H | -4.249753339828 | 0.298140924863  | -2.582160438233 |

29

TS30 -802.986889

|   |                 |                 |                 |
|---|-----------------|-----------------|-----------------|
| C | 2.077770159460  | -1.459262752062 | 1.751800493426  |
| C | 1.117442420524  | -0.772673334531 | 0.722428353695  |
| C | 0.829520833881  | 0.575913388694  | 1.338563937464  |
| C | 1.672159972851  | 0.698601557520  | 2.463546584768  |
| C | 2.425177955916  | -0.456309291168 | 2.713628565769  |
| H | 1.707323619412  | 1.600388946589  | 3.063847018817  |
| O | 2.379547939953  | -2.680246022106 | 1.654832489675  |
| C | -0.078661064794 | 1.526804832368  | 0.836519753193  |
| H | 1.721235436029  | -0.647141090949 | -0.190149593364 |
| H | 3.105541034036  | -0.616916783239 | 3.536839431088  |
| O | -0.081473802212 | 2.737606649465  | 1.530687225333  |
| O | -0.880718357717 | 1.368602931729  | -0.143861597818 |
| C | -1.023628874889 | 3.746458834461  | 1.081983202463  |
| H | -0.823980663999 | 4.618183466433  | 1.705229128028  |
| H | -0.867529855556 | 3.982718270617  | 0.025657902014  |
| H | -2.055289933223 | 3.406859672631  | 1.219045413485  |
| C | -0.091799397330 | -1.740982675505 | 0.438072286285  |
| C | -0.281126787757 | -1.785749674144 | -1.017661960838 |
| C | -1.296008248094 | -1.194013409820 | -1.724167919427 |
| H | 0.492622802985  | -2.291702060930 | -1.595336559523 |
| H | 0.255293213938  | -2.727100664479 | 0.787520503904  |
| H | -0.973161855366 | -1.413912685345 | 0.988069959597  |
| O | -1.271351184613 | -1.269940441427 | -3.145921174065 |
| C | -2.316590124735 | -0.542463287483 | -3.592529251748 |
| C | -3.042196022711 | 0.014736509871  | -2.542452233653 |
| C | -2.398889758504 | -0.387474492608 | -1.357039306387 |
| H | -2.445973922478 | -0.490048869547 | -4.661664424627 |
| H | -2.650797735134 | -0.117103806107 | -0.346398874184 |
| H | -3.906797838094 | 0.648954440801  | -2.633718982173 |

29

TS31 -802.986675

|   |                 |                  |                 |
|---|-----------------|------------------|-----------------|
| C | -1.522448205578 | 2.243858287385   | 0.128443592681  |
| C | -0.721568532077 | 1.861858052085   | 1.329975084186  |
| C | -0.496227828245 | 0.519377481613   | 1.251893380825  |
| C | -1.023879183293 | -0.0511111656639 | 0.000487891041  |
| C | -1.551286955755 | 1.003946209402   | -0.772619989851 |
| H | -1.170257661320 | -1.108056140888  | -0.153353164420 |
| O | -2.066796432171 | 3.332228612016   | -0.102623534310 |
| C | 0.189987980027  | -0.254298993086  | 2.315144092063  |
| H | -0.423807000255 | 2.535378704541   | 2.119655097109  |
| H | -2.372487110186 | 0.877112763776   | -1.467003992024 |
| O | 0.179789627283  | -1.597820433626  | 2.052472213839  |
| O | 0.708636518629  | 0.228579600517   | 3.329732306251  |
| C | 0.794583816632  | -2.473747312769  | 3.049393371390  |
| H | 0.668128037490  | -3.480283764266  | 2.655752364982  |
| H | 1.852199780014  | -2.226043078889  | 3.169530769910  |
| H | 0.288420967182  | -2.361783163591  | 4.010952742972  |
| C | -0.220971930426 | 1.707722784465   | -2.091543762369 |
| C | 0.130374625382  | 0.620532883667   | -2.909116279223 |
| C | 0.822058230448  | -0.451076970066  | -2.336638825234 |
| H | -0.292900444232 | 0.502441166231   | -3.900286896124 |
| H | -0.776255211338 | 2.530711381438   | -2.533759178677 |
| H | 0.480239756093  | 2.023271289624   | -1.315730205791 |
| O | 0.928729452916  | -1.674792435918  | -3.016125935386 |
| C | 1.489779839071  | -2.581828796441  | -2.128976483775 |
| C | 1.738006574123  | -1.992197587794  | -0.919987295215 |
| C | 1.301023221833  | -0.620483286214  | -1.026154628683 |
| H | 1.647606563866  | -3.575743779215  | -2.511215270035 |
| H | 1.540920059702  | 0.176071553805   | -0.341295817297 |
| H | 2.170614090671  | -2.462666592438  | -0.053200268708 |

29

TS32 -802.986663

|   |                 |                 |                |
|---|-----------------|-----------------|----------------|
| C | -0.517963984716 | 2.144808166474  | 0.644252604718 |
| C | 0.052689596397  | 0.723191233408  | 0.859134551979 |
| C | 1.512807443515  | 0.966414605724  | 1.116664822137 |
| C | 1.748397794469  | 2.337304363389  | 1.053312084867 |
| C | 0.563618432072  | 3.060669788026  | 0.750071930549 |
| H | 2.724376424510  | 2.781739033262  | 1.206014542670 |
| O | -1.747539133977 | 2.327993204720  | 0.336167987072 |
| C | 2.449306859914  | -0.095224965250 | 1.351697107299 |
| H | -0.427364787440 | 0.226490409162  | 1.707602391585 |
| H | 0.477185539920  | 4.131184128286  | 0.632727446346 |
| O | 3.725907071964  | 0.348826836800  | 1.662271081843 |
| O | 2.187913791046  | -1.323571904500 | 1.284951972724 |
| C | 4.728837990747  | -0.677678701355 | 1.908433033416 |
| H | 5.644208842740  | -0.132655139151 | 2.136096628041 |
| H | 4.432948938800  | -1.309273013644 | 2.750388487866 |

|   |                 |                 |                 |
|---|-----------------|-----------------|-----------------|
| H | 4.860943816292  | -1.307283940441 | 1.024003987371  |
| C | -0.232165071828 | -0.066873519003 | -0.439317848558 |
| C | -1.688092849440 | -0.238901089369 | -0.671859740648 |
| C | -2.208093829595 | -1.159466952912 | -1.571170913397 |
| H | -2.363986570556 | 0.403218206091  | -0.104644723935 |
| H | 0.173119677137  | 0.537836431570  | -1.268933623186 |
| H | 0.307389781854  | -1.021770168442 | -0.449290862006 |
| O | -3.612581973937 | -1.255230209114 | -1.701785202306 |
| C | -3.868908188210 | -2.208320335939 | -2.633853071661 |
| C | -2.689402223456 | -2.755348302156 | -3.124033919792 |
| C | -1.633661571799 | -2.092903437497 | -2.455571492020 |
| H | -4.905656516721 | -2.399252009569 | -2.855298845700 |
| H | -0.575259996730 | -2.259780409725 | -2.581001236907 |
| H | -2.610351472550 | -3.529957738400 | -3.867906635589 |

29

TS33 -802.986506

|   |                 |                 |                 |
|---|-----------------|-----------------|-----------------|
| C | -1.068085608139 | -2.349605031937 | -0.432429380437 |
| C | -0.388569325674 | -1.137097046528 | 0.287847449560  |
| C | -1.212588865397 | -0.011891129719 | -0.038450433925 |
| C | -2.216119243898 | -0.434554716763 | -0.985221548640 |
| C | -2.141912888594 | -1.786118997865 | -1.246680292289 |
| H | -2.938048885724 | 0.251798974463  | -1.409925610947 |
| O | -0.681964470137 | -3.528067133740 | -0.304800590626 |
| C | -1.029079686849 | 1.284711943593  | 0.531712240629  |
| H | -0.046088721510 | -1.283142447103 | 1.312448739816  |
| H | -2.765191036661 | -2.368255746597 | -1.908037634674 |
| O | -1.966621385685 | 2.216186735572  | 0.117425892003  |
| O | -0.101598074288 | 1.593555730720  | 1.324322256249  |
| C | -1.827336883892 | 3.562844013554  | 0.655703516084  |
| H | -2.657465532326 | 4.125387101402  | 0.230345133567  |
| H | -1.887016719875 | 3.547544336390  | 1.747147254668  |
| H | -0.869360493079 | 3.997826706483  | 0.357933668614  |
| C | 2.723139125843  | -0.617016897742 | 2.151144034384  |
| C | 2.482524852702  | 0.318183375660  | 1.204435275527  |
| C | 1.890013530444  | -0.007369329146 | -0.065009511485 |
| H | 2.698957306070  | 1.365464076260  | 1.374531760237  |
| H | 3.146929082688  | -0.338774110923 | 3.108943472702  |
| H | 2.507425009810  | -1.670994984145 | 1.998841658240  |
| O | 1.814650660687  | 0.948934234849  | -1.020168528925 |
| C | 1.295530892563  | 0.359164025785  | -2.202808392442 |
| C | 1.040884209694  | -0.951197321189 | -1.991315137247 |
| C | 1.259941233348  | -1.206580413199 | -0.551059692942 |
| H | 1.214597683291  | 1.024674376624  | -3.043051551334 |
| H | 1.561519155717  | -2.185085433996 | -0.193062575336 |
| H | 0.651364007376  | -1.660247299227 | -2.701673381950 |

29



TS34 -802.986207

|   |                 |                 |                 |
|---|-----------------|-----------------|-----------------|
| C | -1.304274030275 | 1.267540705932  | 0.770220505670  |
| C | -0.195810308975 | 2.125960531800  | 0.197591254980  |
| C | 0.364840728794  | 1.452292821014  | -0.828680503253 |
| C | -0.256665068591 | 0.071442443230  | -0.965684511055 |
| C | -1.274505054997 | 0.000792246011  | 0.010688545889  |
| H | -0.355817835792 | -0.371826339032 | -1.948401320453 |
| O | -2.083034430636 | 1.611633433469  | 1.681556505895  |
| C | 1.437752827949  | 1.990678673988  | -1.689785634541 |
| H | 0.060600799902  | 3.114325443007  | 0.553044929737  |
| H | -2.088227483958 | -0.707836216286 | 0.034541366305  |
| O | 1.741112207821  | 1.135904228666  | -2.721383255093 |
| O | 2.001556313602  | 3.082229251638  | -1.538814657319 |
| C | 2.762940607132  | 1.582452312128  | -3.669192874769 |
| H | 2.830270486660  | 0.787511794856  | -4.409174600758 |
| H | 2.459124668202  | 2.524380157148  | -4.131416089192 |
| H | 3.716561866465  | 1.724407704041  | -3.155341429576 |
| C | 1.337298451360  | -1.088549560591 | -0.487355817312 |
| C | 0.818273781907  | -2.324769312009 | -0.067410923184 |
| C | 0.037655851424  | -2.363863711089 | 1.088607324491  |
| H | 0.831279587064  | -3.192025870577 | -0.718740451773 |
| H | 1.918690303713  | -1.052270300196 | -1.403880075159 |
| H | 1.667721823395  | -0.381164683976 | 0.271593739050  |
| O | -0.751352677360 | -3.486867755676 | 1.387880812679  |
| C | -1.577522906564 | -3.127702516921 | 2.442209695637  |
| C | -1.356186932641 | -1.832220360903 | 2.823780304557  |
| C | -0.329722684921 | -1.314822435578 | 1.952559949913  |
| H | -2.244683703460 | -3.894255498621 | 2.797830242255  |
| H | 0.225936642776  | -0.404926294533 | 2.110273121170  |
| H | -1.860075963679 | -1.296238135324 | 3.610145082085  |

29

TS35 -802.984935

|   |                 |                 |                 |
|---|-----------------|-----------------|-----------------|
| C | 0.295816172188  | 1.173243148169  | -1.523891828858 |
| C | 1.345084866381  | 0.519811707117  | -0.732306316327 |
| C | 0.985623893133  | 0.642805666506  | 0.617563784674  |
| C | -0.362373090597 | 1.013264017346  | 0.757270929301  |
| C | -0.942877701473 | 1.159001304987  | -0.588561626901 |
| H | -0.859545050447 | 1.238474275882  | 1.688109828273  |
| O | 0.331970937294  | 1.604202582875  | -2.687885226707 |
| C | 1.895902143948  | 0.296508405860  | 1.730857070176  |
| H | 2.315424173356  | 0.231024668469  | -1.109376751581 |
| H | -1.687692416084 | 1.936973132362  | -0.740130202121 |
| O | 1.355327251382  | 0.596447567415  | 2.953634660505  |
| O | 3.017146255552  | -0.212771787542 | 1.600816454635  |
| C | 2.180460529523  | 0.316567561834  | 4.128150827455  |
| H | 1.596514829512  | 0.670437005869  | 4.975402263623  |

|   |                 |                 |                 |
|---|-----------------|-----------------|-----------------|
| H | 2.374703505283  | -0.756058787107 | 4.205651639654  |
| H | 3.131308991269  | 0.849689243446  | 4.056111306413  |
| C | -2.235621730341 | -0.107187328035 | -3.518097092620 |
| C | -2.573637242975 | -0.070563317910 | -2.221016434237 |
| C | -1.631186616609 | -0.282480078693 | -1.076727484148 |
| H | -3.590814087619 | 0.158125673818  | -1.913681668265 |
| H | -2.973552518353 | 0.096887542654  | -4.286233934229 |
| H | -1.222672964522 | -0.303113065896 | -3.854443092799 |
| O | -2.389774484551 | -0.692016009036 | 0.114036842817  |
| C | -1.490828178870 | -1.424649104659 | 0.853932636975  |
| C | -0.458401346578 | -1.930899333528 | 0.066202615114  |
| C | -0.514991809607 | -1.279138986224 | -1.172823586134 |
| H | -1.786020656058 | -1.671623529303 | 1.861530013649  |
| H | -0.010101295791 | -1.552573616265 | -2.085511161395 |
| H | 0.287868073602  | -2.636974168825 | 0.393060921920  |

29

TS36 -802.984835

|   |                 |                 |                 |
|---|-----------------|-----------------|-----------------|
| C | -1.301144227589 | -0.531172213107 | -1.752372709302 |
| C | -1.074036240880 | -0.067755499766 | -0.287896536638 |
| C | -0.146333125414 | -1.103090428109 | 0.287153626324  |
| C | 0.079558103735  | -2.055343860792 | -0.713068246844 |
| C | -0.579582325696 | -1.738331917191 | -1.924783705649 |
| H | 0.669954242714  | -2.948674295460 | -0.546550744262 |
| O | -1.954806363413 | 0.195094531392  | -2.576393708331 |
| C | 0.143879284486  | -1.224978254832 | 1.681020633690  |
| H | -2.028916984122 | -0.031722411542 | 0.249350508305  |
| H | -0.547622720288 | -2.307271320179 | -2.842218552371 |
| O | 0.972669538199  | -2.301257162968 | 1.980862378559  |
| O | -0.278995267038 | -0.468830560381 | 2.596281957544  |
| C | 1.262498878619  | -2.523012122343 | 3.389443914601  |
| H | 1.908607577091  | -3.400232974956 | 3.411790061591  |
| H | 1.770210686408  | -1.656208249558 | 3.821922084986  |
| H | 0.340307186075  | -2.705780338952 | 3.947951024694  |
| C | 0.520332976730  | 1.468139965371  | -3.368551944675 |
| C | 1.295784601738  | 1.534675775936  | -2.253729265818 |
| C | 0.769408103627  | 1.636362797923  | -0.925439167599 |
| H | 2.377551064072  | 1.586906875328  | -2.323551503323 |
| H | 0.995002324500  | 1.428046058743  | -4.344070880992 |
| H | -0.567236648650 | 1.417616859214  | -3.327856401292 |
| O | 1.625447931406  | 2.025494554896  | 0.014776929079  |
| C | 0.917488945054  | 2.232252905270  | 1.255012598561  |
| C | -0.380686968401 | 1.958701671392  | 1.075160368803  |
| C | -0.587279773743 | 1.450410922345  | -0.326982519249 |
| H | 1.540329959037  | 2.515006551228  | 2.082911440230  |
| H | -1.361598731160 | 1.952450351035  | -0.923416075675 |
| H | -1.139050612489 | 1.957582291020  | 1.838919344880  |

29

TS37 -802.984828

|   |                 |                 |                 |
|---|-----------------|-----------------|-----------------|
| C | -0.135964741671 | 0.156668873108  | -1.679966395267 |
| C | -1.283723914987 | 0.032652778577  | -0.863384793735 |
| C | -1.013130102602 | -0.942883180004 | 0.167103054240  |
| C | 0.312911575995  | -1.305593857508 | 0.170088827220  |
| C | 1.014117996886  | -0.504967778840 | -0.862902184837 |
| H | 0.778368520866  | -2.009656238626 | 0.843293892919  |
| O | 0.068627561939  | 0.881202869235  | -2.715919702264 |
| C | -2.052801287314 | -1.435124769370 | 1.095756757068  |
| H | -2.248487649867 | 0.477770446225  | -1.060111105118 |
| H | 1.807016270977  | -0.993823056105 | -1.426549044061 |
| O | -1.575039061230 | -2.386590871631 | 1.961166254652  |
| O | -3.227974448472 | -1.043773039502 | 1.117324813210  |
| C | -2.531954163634 | -2.957630659692 | 2.907243891385  |
| H | -1.963215295693 | -3.689590336163 | 3.477452391092  |
| H | -2.931710970309 | -2.177028296969 | 3.559306502370  |
| H | -3.355951498552 | -3.433379320345 | 2.370055887597  |
| C | 2.469891109108  | 0.363618785633  | 2.142986826981  |
| C | 2.697914016327  | 0.543820611136  | 0.833693295930  |
| C | 1.632738277301  | 0.828070182126  | -0.188979651907 |
| H | 3.700119983631  | 0.463127007751  | 0.420482680549  |
| H | 3.282469127488  | 0.127750224759  | 2.821551211117  |
| H | 1.475697549233  | 0.431725922396  | 2.575482914575  |
| O | 2.279246523813  | 1.525332287693  | -1.334277505085 |
| C | 1.424093953818  | 2.496962115477  | -1.742090858942 |
| C | 0.475232732835  | 2.808627342945  | -0.751459956092 |
| C | 0.502048795023  | 1.773183802255  | 0.170735896196  |
| H | 1.667015829777  | 3.000690482997  | -2.662915150645 |
| H | -0.083475907900 | 1.681278666945  | 1.071566366452  |
| H | -0.243754980016 | 3.608198158344  | -0.807833072238 |

29

TS38 -802.983866

|   |                 |                 |                 |
|---|-----------------|-----------------|-----------------|
| C | 0.519480112795  | 1.948856564619  | 2.175614384352  |
| C | 0.055309007245  | 1.060016008194  | 0.987398101669  |
| C | 0.943596829131  | -0.179612671078 | 1.078842562086  |
| C | 1.793664605910  | 0.008330163322  | 2.187066507570  |
| C | 1.580977303902  | 1.233464931418  | 2.832937410903  |
| H | 2.505035008900  | -0.742852898292 | 2.508677227656  |
| O | 0.034765866280  | 3.092732501559  | 2.386728676720  |
| C | 0.697706506431  | -1.415660897186 | 0.416574343780  |
| H | -1.007067534385 | 0.810956166408  | 1.086959203075  |
| H | 2.084754977290  | 1.589018947030  | 3.720350413107  |
| O | 1.572649491628  | -2.431036201183 | 0.799439997592  |
| O | -0.207417913284 | -1.655874508805 | -0.437850671390 |
| C | 1.374855997616  | -3.728794877584 | 0.175047760947  |

|   |                 |                 |                 |
|---|-----------------|-----------------|-----------------|
| H | 2.146022198381  | -4.369580507112 | 0.602192916267  |
| H | 0.378868436242  | -4.119905034388 | 0.400037532781  |
| H | 1.488914945415  | -3.658109041731 | -0.910742763046 |
| C | 0.280734137643  | 1.932392551126  | -0.292623814311 |
| C | 0.235296651778  | 0.995190024180  | -1.437340241184 |
| C | -0.932358675611 | 0.569907009540  | -2.036299919230 |
| H | 1.164787592368  | 0.568138844324  | -1.804288609484 |
| H | 1.266335326879  | 2.397325639687  | -0.225045710888 |
| H | -0.481173839499 | 2.717088798634  | -0.322589098972 |
| O | -0.856224736176 | -0.400826203506 | -3.053709884922 |
| C | -2.119395304539 | -0.761667723156 | -3.355131896107 |
| C | -3.045022180858 | -0.045449395870 | -2.595761065283 |
| C | -2.295582876792 | 0.805238336637  | -1.762560370748 |
| H | -2.239650718192 | -1.517549438242 | -4.113383406204 |
| H | -2.668713342756 | 1.493067741339  | -1.019820579313 |
| H | -4.115815320102 | -0.148048116353 | -2.641237838339 |

29

TS39 -802.983388

|   |                 |                 |                 |
|---|-----------------|-----------------|-----------------|
| C | 1.437760791173  | -1.040773272370 | 0.703197174330  |
| C | 0.825104726124  | 0.190749593087  | 1.185020971238  |
| C | 0.735081329749  | 1.071015901370  | 0.091817338150  |
| C | 0.947066931875  | 0.407292054374  | -1.121533145133 |
| C | 1.184062534154  | -1.022375757055 | -0.834911107971 |
| H | 0.978227351766  | 0.878576352497  | -2.092914822312 |
| O | 1.999850356488  | -1.955991024590 | 1.332636787011  |
| C | 0.373872075638  | 2.499098291128  | 0.229739885358  |
| H | 0.690653488185  | 0.450267040237  | 2.224547764961  |
| H | 1.925466135149  | -1.532907429923 | -1.449005541818 |
| O | 0.473504122323  | 3.177322421127  | -0.958460880024 |
| O | 0.016145599606  | 3.044120264233  | 1.281822149997  |
| C | 0.149184140852  | 4.602217578483  | -0.933217507086 |
| H | 0.296605597607  | 4.944975708071  | -1.955544815209 |
| H | -0.885979164450 | 4.748970393517  | -0.614758044782 |
| H | 0.814211195085  | 5.128344876139  | -0.244250682406 |
| C | -1.954351532105 | 0.527164458297  | -1.086207794147 |
| C | -1.972583903495 | -0.262571780107 | 0.035086327788  |
| C | -1.152392805692 | -1.408195454704 | 0.121326396556  |
| H | -2.542250473622 | 0.020306253940  | 0.913293329232  |
| H | -2.477468830092 | 1.477289137281  | -1.104293493544 |
| H | -1.510320220591 | 0.201921329322  | -2.019265381531 |
| O | -1.369980241922 | -2.376577637187 | 1.083715774463  |
| C | -0.644880744761 | -3.526674167381 | 0.689983275547  |
| C | -0.001070512006 | -3.340466067268 | -0.473646235243 |
| C | -0.206502817325 | -1.915094920247 | -0.918710878781 |
| H | -0.706271116833 | -4.354191183231 | 1.374898805985  |
| H | -0.563658159643 | -1.813495573327 | -1.944822361998 |

|                  |                 |                 |                 |
|------------------|-----------------|-----------------|-----------------|
| H                | 0.641364032036  | -4.053428483301 | -0.963733446324 |
| 29               |                 |                 |                 |
| TS40 -802.982398 |                 |                 |                 |
| C                | -0.400404661418 | 0.891864288538  | -1.677727023618 |
| C                | 0.201614935246  | 0.596894344199  | -0.278759957334 |
| C                | 1.302445166595  | -0.283449061704 | -0.536779216549 |
| C                | 1.229840803676  | -0.704697183419 | -1.906127654839 |
| C                | 0.201007714503  | -0.068592431089 | -2.584592066716 |
| H                | 1.923666903521  | -1.416581242248 | -2.334773409329 |
| O                | -1.244099277074 | 1.794180429999  | -1.904355016083 |
| C                | 2.300948687698  | -0.667186296240 | 0.425121818970  |
| H                | 0.260886532435  | 1.395965563100  | 0.454137590497  |
| H                | -0.055494882064 | -0.165591147938 | -3.628822393505 |
| O                | 3.297985329576  | -1.455031268691 | -0.126282129958 |
| O                | 2.312203459761  | -0.359842607997 | 1.639834542574  |
| C                | 4.370174457974  | -1.872155602377 | 0.769210171338  |
| H                | 5.040385805149  | -2.467320905544 | 0.150670922550  |
| H                | 4.886997857921  | -0.999841010042 | 1.177222309008  |
| H                | 3.971106653727  | -2.466897026081 | 1.595288969156  |
| C                | -3.483025997768 | 0.515992021223  | -1.552676705136 |
| C                | -3.423052266548 | 0.818382663586  | -0.227728171992 |
| C                | -2.406323838776 | 0.337156987172  | 0.645870958707  |
| H                | -4.149470316784 | 1.489696812356  | 0.218028978707  |
| H                | -4.258265772860 | 0.941412160706  | -2.179434742255 |
| H                | -2.802271888607 | -0.179696697035 | -2.029064121913 |
| O                | -2.514752687688 | 0.674365100821  | 1.967734971228  |
| C                | -1.498544927765 | -0.006090041695 | 2.676868902189  |
| C                | -0.739878776606 | -0.729274330257 | 1.825960733357  |
| C                | -1.214990596374 | -0.451210349731 | 0.448415558217  |
| H                | -1.481534503967 | 0.166188279736  | 3.737872031813  |
| H                | -1.212923341397 | -1.209814104639 | -0.330664190918 |
| H                | 0.136079567651  | -1.299459524561 | 2.082868866714  |

29

TS41 -802.978342

|   |                 |                 |                 |
|---|-----------------|-----------------|-----------------|
| C | -0.240403041186 | -0.556346275210 | 1.799664181460  |
| C | 0.518473529711  | -1.179196917973 | 0.784335174298  |
| C | -0.268861005685 | -1.205996095281 | -0.427716507382 |
| C | -1.408392923290 | -0.456683832714 | -0.283412766701 |
| C | -1.359164073009 | 0.222303123664  | 1.040517425683  |
| H | -2.166116753294 | -0.313290884767 | -1.039648571822 |
| O | 0.028116189006  | -0.397892255412 | 3.036711739598  |
| C | 0.146191422588  | -1.946061799718 | -1.637051986685 |
| H | 1.464375889176  | -1.681833561555 | 0.923378599592  |
| H | -2.309183310298 | 0.344715496190  | 1.560716505049  |
| O | -0.756661387056 | -1.821849205851 | -2.664080728560 |
| O | 1.188363533022  | -2.606127883438 | -1.741666813948 |

|   |                 |                 |                 |
|---|-----------------|-----------------|-----------------|
| C | -0.439503443724 | -2.528278293119 | -3.903699404422 |
| H | -1.269133996277 | -2.311947090615 | -4.574147080364 |
| H | 0.503999642151  | -2.161698807711 | -4.315799355682 |
| H | -0.355655305195 | -3.601497841065 | -3.716311868430 |
| C | 1.533503109313  | 1.374050811230  | 3.063754921785  |
| C | 1.845214089731  | 1.410939448370  | 1.720154841553  |
| C | 0.846056191477  | 1.501029558660  | 0.736981013361  |
| H | 2.858412905752  | 1.236776810207  | 1.375003857659  |
| H | 2.297113035694  | 1.135423326272  | 3.795270292681  |
| H | 0.591867561549  | 1.733250738099  | 3.455620329585  |
| O | 1.193865246536  | 1.766764207435  | -0.581058509574 |
| C | 0.056652939745  | 2.349542835912  | -1.204732876564 |
| C | -1.003651486427 | 2.398341602599  | -0.386157139101 |
| C | -0.646229761254 | 1.683185211121  | 0.898779181758  |
| H | 0.220369406879  | 2.663590409947  | -2.221459912002 |
| H | -0.895944747569 | 2.229034016524  | 1.810432454293  |
| H | -1.982146315547 | 2.780506124126  | -0.629048360769 |

29

TS42 -802.978105

|   |                 |                 |                 |
|---|-----------------|-----------------|-----------------|
| C | -0.182800349480 | -2.059832141035 | -1.144579903896 |
| C | -0.888897733946 | -0.693237156274 | -1.178224431177 |
| C | 0.133206515137  | 0.256578442245  | -1.377376154867 |
| C | 1.439777230011  | -0.425397731905 | -1.328900935547 |
| C | 1.273143486966  | -1.770360580669 | -1.202081525765 |
| H | 2.380638491927  | 0.106111708064  | -1.379433871902 |
| O | -0.758549738142 | -3.156654340881 | -1.089424340165 |
| C | -0.170257657491 | 1.622501653381  | -1.256438352063 |
| H | -1.881926813318 | -0.611590194086 | -1.602824155111 |
| H | 2.034537088669  | -2.531021493621 | -1.121516606687 |
| O | 0.878863853224  | 2.511998370027  | -1.299738619659 |
| O | -1.364746237139 | 2.011559439743  | -0.990313759138 |
| C | 0.552750364379  | 3.929514581560  | -1.186948784572 |
| H | 1.500966074557  | 4.447677391786  | -1.319591118235 |
| H | -0.161770400546 | 4.220696532595  | -1.961322411908 |
| H | 0.125517980799  | 4.150444009504  | -0.205059517077 |
| C | -2.219130312651 | 0.853602909854  | 0.634597152533  |
| C | -1.523781228433 | -0.364470340716 | 0.738444206615  |
| C | -0.321576972117 | -0.416329701434 | 1.575455351675  |
| H | -2.096733306059 | -1.288350307273 | 0.681031554451  |
| H | -3.193889131718 | 0.887315869704  | 0.163918971227  |
| H | -1.936028436610 | 1.719537961303  | 1.220153698428  |
| O | 0.062636746264  | -1.662038692116 | 2.053689722223  |
| C | 1.261969466898  | -1.492476334394 | 2.730259941950  |
| C | 1.637970198087  | -0.176207688775 | 2.684299995940  |
| C | 0.619789459706  | 0.520106720162  | 1.934187973283  |
| H | 1.687217265153  | -2.377154827466 | 3.169998808105  |

|   |                |                |                |
|---|----------------|----------------|----------------|
| H | 0.604154090952 | 1.569485670760 | 1.684897738027 |
| H | 2.526036604941 | 0.250263583318 | 3.121174986373 |

29

TS43 -802.977632

|   |                 |                 |                 |
|---|-----------------|-----------------|-----------------|
| C | -0.817814403965 | 1.748526988374  | 0.081636556960  |
| C | -0.147492693628 | 0.514326530825  | -0.593649729331 |
| C | -1.179879335688 | -0.552081826397 | -0.457111787682 |
| C | -2.193543048044 | -0.074932943479 | 0.393474863217  |
| C | -1.966643228294 | 1.254060119154  | 0.790110102544  |
| H | -3.045352072826 | -0.674254846339 | 0.692198916399  |
| O | -0.430244776539 | 2.940249442743  | -0.114867975284 |
| C | -0.966624094618 | -1.845196900892 | -1.009290598376 |
| H | 0.123848377660  | 0.724437940678  | -1.629880449412 |
| H | -2.618726315721 | 1.867112292147  | 1.394451175795  |
| O | -2.004170529682 | -2.741854026905 | -0.804921862260 |
| O | 0.088132115859  | -2.191654715690 | -1.615806915202 |
| C | -1.841778590620 | -4.066917513672 | -1.388631315183 |
| H | -2.762814899311 | -4.597120638905 | -1.149272645445 |
| H | -1.704746822908 | -3.994199683049 | -2.470721815557 |
| H | -0.975580206471 | -4.575887568598 | -0.956721926569 |
| C | 2.133621473493  | 2.853633826133  | -1.011010491226 |
| C | 2.594423549206  | 2.317512948442  | 0.152755050231  |
| C | 2.100194905895  | 1.096962507070  | 0.680390923824  |
| H | 3.249439831300  | 2.884396401266  | 0.804408176789  |
| H | 2.429198842077  | 3.854035830678  | -1.307182472292 |
| H | 1.462043318054  | 2.332188670402  | -1.677471810672 |
| O | 2.428753208881  | 0.840852842126  | 1.962954555053  |
| C | 1.746760742871  | -0.346582864077 | 2.386426957559  |
| C | 0.999559087014  | -0.823423779697 | 1.386080047662  |
| C | 1.193754511549  | 0.034782450366  | 0.154375580694  |
| H | 1.931020867737  | -0.628665737923 | 3.407278689759  |
| H | 1.682404910836  | -0.583123792623 | -0.618849911456 |
| H | 0.366425409164  | -1.694071677410 | 1.415971640117  |

29

TS44 -802.977395

|   |                 |                 |                 |
|---|-----------------|-----------------|-----------------|
| C | 1.478915482564  | -1.421621987399 | 0.695941472664  |
| C | 0.468667148695  | -1.425948387708 | -0.362661427861 |
| C | 0.194721098024  | -0.122455827151 | -0.843590359620 |
| C | 1.282815507694  | 0.824630016469  | -0.275582122712 |
| C | 1.894627429682  | -0.028855013050 | 0.760943104624  |
| H | 1.980261421171  | 1.178661601501  | -1.038104886448 |
| O | 1.877510027086  | -2.395586462571 | 1.400272356124  |
| C | -0.381929200395 | 0.033757415569  | -2.208539974614 |
| H | -0.044787916707 | -2.318526580574 | -0.699237877855 |
| H | 2.587689322739  | 0.342921799726  | 1.508693674432  |
| O | -0.153136764791 | 1.292690287120  | -2.716502436363 |

|   |                 |                 |                 |
|---|-----------------|-----------------|-----------------|
| O | -1.020190854925 | -0.824160431885 | -2.825977031529 |
| C | -0.690099133297 | 1.572985839363  | -4.049928229721 |
| H | -0.416222201953 | 2.606012086389  | -4.254720533119 |
| H | -0.244786802159 | 0.895300759426  | -4.781582927968 |
| H | -1.774975223149 | 1.444277270866  | -4.054040392659 |
| C | 0.314736315546  | 1.961096871621  | 0.232470556831  |
| C | -0.877173550205 | 1.025851088572  | 0.244948076817  |
| C | -1.115147373086 | 0.346496883410  | 1.488672945304  |
| H | -1.742264904570 | 1.243169544784  | -0.375660368847 |
| H | 0.218272164089  | 2.732812663505  | -0.529476058676 |
| H | 0.585343561919  | 2.410847023764  | 1.186827329347  |
| O | -2.063732480482 | -0.673402916927 | 1.500982703471  |
| C | -1.912132183928 | -1.357072934403 | 2.695194339852  |
| C | -0.904377654811 | -0.800817322531 | 3.438588451246  |
| C | -0.381390970562 | 0.292247228350  | 2.664786077528  |
| H | -2.583488583660 | -2.182152504342 | 2.857220060454  |
| H | 0.398046815816  | 0.973266276773  | 2.963276626770  |
| H | -0.558136239587 | -1.138888294900 | 4.400280559989  |

29

TS45 -802.977030

|   |                 |                 |                 |
|---|-----------------|-----------------|-----------------|
| C | -1.481580930333 | -1.229208987405 | -1.211444710913 |
| C | -0.551995088114 | -0.026796387709 | -0.823816255976 |
| C | -1.084790833061 | 0.445656693935  | 0.418274715659  |
| C | -2.115746230601 | -0.470684121324 | 0.866271798914  |
| C | -2.355416622092 | -1.456871109429 | -0.056952731141 |
| H | -2.626719051285 | -0.348594879515 | 1.812919523765  |
| O | -1.467386806595 | -1.800767922528 | -2.314888883000 |
| C | -0.615567392874 | 1.616620061807  | 1.078423172553  |
| H | -0.313325400578 | 0.667920730191  | -1.630005960236 |
| H | -3.066348658092 | -2.266528183852 | 0.005253672530  |
| O | -1.264364157866 | 1.887085627825  | 2.272518386146  |
| O | 0.327289552537  | 2.349488884285  | 0.666387140838  |
| C | -0.851729474503 | 3.089854639915  | 2.983495648379  |
| H | -1.505172150960 | 3.143029076688  | 3.853294767961  |
| H | 0.195576206246  | 3.016887696281  | 3.289597289499  |
| H | -0.974994282315 | 3.971712472256  | 2.349375995623  |
| C | 1.066715542540  | -1.675534037950 | 1.726793821127  |
| C | 1.009864475339  | -1.876962546753 | 0.400969342371  |
| C | 1.119039190018  | -0.781504768382 | -0.601071571179 |
| H | 0.827340131724  | -2.861520352117 | -0.018215185667 |
| H | 0.933128324198  | -2.501186316755 | 2.416420665004  |
| H | 1.226208153714  | -0.693790547082 | 2.162816217076  |
| O | 1.383920373448  | -1.295578287959 | -1.930394516867 |
| C | 2.161060059441  | -0.403060395288 | -2.572237479237 |
| C | 2.583571347136  | 0.616029032502  | -1.718074127187 |
| C | 1.999633096953  | 0.361514488507  | -0.468699179575 |



|   |                |                 |                 |
|---|----------------|-----------------|-----------------|
| H | 2.348518753933 | -0.589946745651 | -3.617481991490 |
| H | 2.114098006831 | 0.947620634611  | 0.427560496606  |
| H | 3.228827583599 | 1.437468677883  | -1.979659983432 |

29

TS46 -802.976049

|   |                 |                 |                 |
|---|-----------------|-----------------|-----------------|
| C | -0.025747864060 | -0.847663291053 | -0.593315804961 |
| C | 1.028012395323  | -0.996448883219 | 0.386930373668  |
| C | 0.420730463713  | -1.046569648244 | 1.644041770997  |
| C | -0.992731319763 | -0.883801580530 | 1.564373253003  |
| C | -1.323980201170 | -0.594458716601 | 0.216181801556  |
| H | -1.666803154523 | -0.928230751935 | 2.405979848324  |
| O | 0.040017336647  | -0.872887157298 | -1.851517240456 |
| C | 1.184155807176  | -1.279203962715 | 2.893231616939  |
| H | 2.079123009862  | -1.121886978103 | 0.176012657526  |
| H | -2.286169181301 | -0.828061933350 | -0.225301651159 |
| O | 0.372201233607  | -1.316865670309 | 3.997726281068  |
| O | 2.411994023928  | -1.423269927488 | 2.963459246683  |
| C | 1.022713873932  | -1.556765580628 | 5.284593909274  |
| H | 0.217943949713  | -1.541390315395 | 6.016903665262  |
| H | 1.527026536985  | -2.526104558518 | 5.276329954930  |
| H | 1.755729434996  | -0.772579972250 | 5.489367204607  |
| C | -1.305793372830 | 1.328701741111  | 0.067151017112  |
| C | -1.702191512523 | 1.720446363359  | -1.233997580810 |
| C | -0.853357116863 | 1.765712701994  | -2.349070159318 |
| H | -2.753442852065 | 1.914751038100  | -1.428634018152 |
| H | -2.012504812043 | 1.563524325498  | 0.856157959504  |
| H | -0.260198568283 | 1.473860185662  | 0.345768587204  |
| O | -1.437767210885 | 2.044916090836  | -3.598046835231 |
| C | -0.430345283139 | 2.010920245555  | -4.534048888992 |
| C | 0.777138190298  | 1.725289566338  | -3.940914323015 |
| C | 0.518844607039  | 1.553516791323  | -2.546434003322 |
| H | -0.720128036098 | 2.204460982840  | -5.552672330557 |
| H | 1.246439090773  | 1.350515159010  | -1.779234287336 |
| H | 1.726591401766  | 1.626367814599  | -4.439166605517 |

29

TS47 -802.975973

|   |                 |                 |                 |
|---|-----------------|-----------------|-----------------|
| C | -2.131920192707 | -0.042738924588 | -0.596408421532 |
| C | -0.726097535110 | -0.144963440738 | 0.093980640390  |
| C | -0.435992766027 | 1.269061933286  | 0.459821550284  |
| C | -1.422558697630 | 2.091366918028  | -0.116292262974 |
| C | -2.398074947615 | 1.349983379295  | -0.798560796011 |
| H | -1.423827531149 | 3.168834198724  | -0.003896953142 |
| O | -2.837925128018 | -1.052655495790 | -0.883490611145 |
| C | 0.618903606481  | 1.652616980991  | 1.339486459110  |
| H | -0.710485186885 | -0.843844086689 | 0.930641895103  |
| H | -3.270906340746 | 1.733695128261  | -1.305026930996 |

|   |                 |                 |                 |
|---|-----------------|-----------------|-----------------|
| O | 0.650801334846  | 3.017673791797  | 1.608145119222  |
| O | 1.475206556986  | 0.875193920204  | 1.837691690486  |
| C | 1.675333640155  | 3.470598411038  | 2.537617267177  |
| H | 1.501202954017  | 4.539827346502  | 2.653957009873  |
| H | 1.579867385334  | 2.955205561141  | 3.497035464674  |
| H | 2.674528201882  | 3.282823942623  | 2.134092701580  |
| C | -1.436369390549 | -3.391009366993 | -1.641937213290 |
| C | -0.187314828771 | -3.352496300540 | -1.107765278197 |
| C | 0.599969099162  | -2.165846119662 | -0.972651812710 |
| H | 0.311064512713  | -4.264291323142 | -0.793104784570 |
| H | -1.963652459369 | -4.337940185036 | -1.704108129533 |
| H | -1.964629131014 | -2.503583293665 | -1.971941503142 |
| O | 1.899774172165  | -2.373939575511 | -0.699109890838 |
| C | 2.586880721435  | -1.116733213718 | -0.693693272071 |
| C | 1.712231724811  | -0.129152340377 | -0.913520316410 |
| C | 0.325787338083  | -0.704204402976 | -1.048590990903 |
| H | 3.637938039629  | -1.177671406890 | -0.480426144820 |
| H | -0.159094764603 | -0.418524126482 | -1.991518823355 |
| H | 1.927708730524  | 0.924803958292  | -0.937884037185 |

29

TS48 -802.975711

|   |                 |                 |                 |
|---|-----------------|-----------------|-----------------|
| C | 1.536549700460  | 1.620910529105  | 0.426060456978  |
| C | 1.110044007605  | 0.147807925695  | 0.136208345335  |
| C | -0.043874679257 | -0.079225241066 | 1.092504845518  |
| C | -0.176321757979 | 1.081870121409  | 1.880390322456  |
| C | 0.717607176931  | 2.090595694651  | 1.505507099737  |
| H | -0.893285696181 | 1.155091916447  | 2.689490184335  |
| O | 2.463979290560  | 2.197058546907  | -0.210302159219 |
| C | -0.667650401430 | -1.328373503589 | 1.274372523178  |
| H | 1.962377247497  | -0.497830029608 | 0.382295649230  |
| H | 0.817356839279  | 3.066932119335  | 1.956033768920  |
| O | -1.613455216716 | -1.363397740040 | 2.294546205479  |
| O | -0.458883684809 | -2.364032018330 | 0.563530786018  |
| C | -2.247759032487 | -2.646269592235 | 2.551945556080  |
| H | -2.935738443639 | -2.461962440113 | 3.376684938181  |
| H | -2.789758123284 | -3.000132758451 | 1.669868856104  |
| H | -1.502765559010 | -3.396623981023 | 2.830094673482  |
| C | -2.119239976793 | -1.458380647752 | -1.430795247424 |
| C | -1.869847296735 | -0.129609168421 | -1.577435405191 |
| C | -0.547832954551 | 0.372944629095  | -1.801588409411 |
| H | -2.675939480298 | 0.591095937353  | -1.667884409532 |
| H | -3.142011050095 | -1.808518557977 | -1.337922254117 |
| H | -1.334559914114 | -2.203184798399 | -1.392405797955 |
| O | -0.423436194378 | 1.433219670207  | -2.590719287544 |
| C | 0.975630917637  | 1.614450149050  | -2.932779239316 |
| C | 1.713373940533  | 0.698447181641  | -2.293851628929 |

|   |                |                 |                 |
|---|----------------|-----------------|-----------------|
| C | 0.810437239746 | -0.121588456895 | -1.397931456549 |
| H | 1.166893933208 | 2.452884982078  | -3.576073239195 |
| H | 0.877930029837 | -1.207288275726 | -1.526573048618 |
| H | 2.786145639631 | 0.621659886735  | -2.317328249868 |

29

TS49 -802.975429

|   |                 |                 |                 |
|---|-----------------|-----------------|-----------------|
| C | -1.226909874229 | 1.703890933739  | 1.252593240385  |
| C | -0.270714416862 | 0.863859405425  | 0.314059910380  |
| C | 0.138535187374  | -0.296114999735 | 1.210068753550  |
| C | -0.497147520168 | -0.115678518488 | 2.462375610044  |
| C | -1.312281342810 | 1.011511519506  | 2.503291067862  |
| H | -0.322060482106 | -0.785353117302 | 3.295727301729  |
| O | -1.803738450827 | 2.768942884710  | 0.894149874999  |
| C | 1.248792527258  | -1.145290852928 | 1.003081486748  |
| H | 0.592279701611  | 1.477873965104  | 0.029463328285  |
| H | -1.898904156393 | 1.362049509626  | 3.339158675771  |
| O | 1.558408678214  | -1.949901469630 | 2.100574007854  |
| O | 1.923273269409  | -1.270476186795 | -0.071415883563 |
| C | 2.695159917301  | -2.844428590848 | 1.953888318338  |
| H | 2.797381005182  | -3.332089899332 | 2.923078196333  |
| H | 2.513125314270  | -3.584904499876 | 1.168573308615  |
| H | 3.600124308821  | -2.284525743712 | 1.704566046706  |
| C | 0.051266180743  | -2.403213789018 | -1.319639315598 |
| C | 0.088994625747  | -1.478016230856 | -2.318466916442 |
| C | -0.392037604275 | -0.160246495473 | -2.135817172967 |
| H | 0.570369142567  | -1.686627584306 | -3.266219128219 |
| H | 0.486904862543  | -3.385502134653 | -1.463738568026 |
| H | -0.454280274725 | -2.210080035736 | -0.376863149371 |
| O | -0.288207403262 | 0.647034213105  | -3.193308544616 |
| C | -0.969087953099 | 1.892811710821  | -2.915636059731 |
| C | -1.492236620726 | 1.856870675943  | -1.688500615111 |
| C | -1.102596012021 | 0.553294113477  | -1.006128104456 |
| H | -0.930170655857 | 2.605038226165  | -3.719761663589 |
| H | -1.971107127849 | -0.037835948345 | -0.688236323694 |
| H | -2.012776930004 | 2.640050768492  | -1.158198402812 |

29

TS50 -802.975102

|   |                 |                 |                 |
|---|-----------------|-----------------|-----------------|
| C | -0.166381526113 | -2.096623580989 | 0.222000004695  |
| C | -0.557502532543 | -0.580678846139 | 0.217852670352  |
| C | 0.299467367750  | 0.026751595181  | 1.185884115051  |
| C | 1.209902619192  | -0.978218339434 | 1.684743260853  |
| C | 0.950829427601  | -2.222415799936 | 1.147422884036  |
| H | 1.972567116659  | -0.755655420291 | 2.420676176107  |
| O | -0.711467988254 | -2.957371880881 | -0.501664781136 |
| C | 0.119128778971  | 1.365699929260  | 1.674056311977  |
| H | -1.616310907219 | -0.322291166872 | 0.216997132704  |

|   |                 |                 |                 |
|---|-----------------|-----------------|-----------------|
| H | 1.477560186911  | -3.145723766508 | 1.332871605316  |
| O | 1.041828378329  | 1.705903813507  | 2.654385459204  |
| O | -0.759431101306 | 2.174916702377  | 1.296877597635  |
| C | 0.917344705630  | 3.039539925864  | 3.226781853694  |
| H | 1.712261351199  | 3.106832579005  | 3.968479136026  |
| H | 1.040978632933  | 3.801671652772  | 2.452562895723  |
| H | -0.062674558015 | 3.165956084249  | 3.694690962678  |
| C | 1.814853832879  | -1.206142729233 | -2.647881786834 |
| C | 1.320088193222  | -0.385238877573 | -1.709290103096 |
| C | -0.129508945890 | -0.101597472555 | -1.517599254661 |
| H | 1.967664464331  | 0.120515078393  | -0.997516148987 |
| H | 2.881287183212  | -1.394342734513 | -2.706918206592 |
| H | 1.183036741144  | -1.721657414124 | -3.364274252126 |
| O | -0.396555386434 | 1.323588897928  | -1.472634003404 |
| C | -1.615407993338 | 1.533744420781  | -1.994478723179 |
| C | -2.151251235443 | 0.356519474024  | -2.528531906313 |
| C | -1.212834849168 | -0.657311117570 | -2.292573662644 |
| H | -2.008071035439 | 2.534498448151  | -1.917095407459 |
| H | -1.310677019010 | -1.710714687948 | -2.504336619340 |
| H | -3.113082755548 | 0.259779688621  | -3.003662797730 |

29

TS51 -802.974918

|   |                 |                 |                 |
|---|-----------------|-----------------|-----------------|
| C | 0.996495136707  | -0.897574559650 | -1.899498830538 |
| C | 0.264762307934  | 0.120391485452  | -0.943621971843 |
| C | -0.951028233092 | -0.641764073882 | -0.481496431282 |
| C | -0.863488306363 | -1.942993494689 | -1.026892275979 |
| C | 0.286031520210  | -2.142578704559 | -1.793215246431 |
| H | -1.629839275830 | -2.689517553579 | -0.857986438409 |
| O | 2.012693360215  | -0.589021257573 | -2.571987294548 |
| C | -2.057031917764 | -0.169672908343 | 0.285529394632  |
| H | 0.031774726009  | 1.057686805799  | -1.456916640975 |
| H | 0.567220006745  | -3.042213737033 | -2.319985132852 |
| O | -3.140574496264 | -1.043066123034 | 0.257625625220  |
| O | -2.135922360333 | 0.891036662773  | 0.976403339837  |
| C | -4.303562901797 | -0.668755452501 | 1.047531880916  |
| H | -5.025277707338 | -1.468515733489 | 0.883687960325  |
| H | -4.047250235263 | -0.590246113521 | 2.108337697749  |
| H | -4.704864533629 | 0.290106541560  | 0.710394691354  |
| C | 3.775876674366  | 1.186710417280  | 0.151799711396  |
| C | 2.562328835285  | 1.217559620773  | -0.417660219391 |
| C | 1.363600332229  | 0.510804659020  | 0.154549152792  |
| H | 2.390475261037  | 1.765540951897  | -1.336427531536 |
| H | 4.609254378116  | 1.716789897872  | -0.295628413484 |
| H | 3.984265043930  | 0.625087962272  | 1.059276972899  |
| O | 0.612983966323  | 1.491515291257  | 1.045524827152  |
| C | 0.202716193560  | 0.836674140954  | 2.096940365606  |

|   |                 |                 |                |
|---|-----------------|-----------------|----------------|
| C | 0.786985254495  | -0.471013998620 | 2.193860010896 |
| C | 1.566262979752  | -0.637019333091 | 1.077752409516 |
| H | -0.468270332667 | 1.344032619103  | 2.773158631497 |
| H | 2.154948773097  | -1.499191180732 | 0.800703128732 |
| H | 0.619769889906  | -1.164029728696 | 3.001100956857 |

29

TS52 -802.974739

|   |                 |                 |                 |
|---|-----------------|-----------------|-----------------|
| C | -1.098542498171 | 1.660546172388  | 0.425268511746  |
| C | 0.135238923665  | 0.857721556193  | -0.058598960036 |
| C | -0.332224108024 | 0.102076256846  | -1.182732232248 |
| C | -1.749211887769 | 0.259391514974  | -1.274078661925 |
| C | -2.225014348818 | 1.151682201350  | -0.318349947554 |
| H | -2.349766176083 | -0.240670930512 | -2.023300954984 |
| O | -1.051387379202 | 2.513571276476  | 1.355298701507  |
| C | 0.544607032958  | -0.576639581721 | -2.106220283973 |
| H | 1.101045316387  | 1.347676143447  | -0.106091169980 |
| H | -3.248503418703 | 1.453354708805  | -0.155526952161 |
| O | -0.144789280335 | -1.206495892868 | -3.129663827639 |
| O | 1.791841480092  | -0.613359403517 | -2.038351091232 |
| C | 0.662639757789  | -1.886598323927 | -4.134538664499 |
| H | -0.052668908172 | -2.281957534579 | -4.854439854241 |
| H | 1.349819622309  | -1.183893710376 | -4.612827302188 |
| H | 1.241951789233  | -2.693181946826 | -3.677002687282 |
| C | 1.717389278061  | -2.307147041874 | 0.865883201478  |
| C | 0.548878255360  | -1.653275616788 | 0.918068213967  |
| C | 0.373693748333  | -0.277961096088 | 1.452767701860  |
| H | -0.363419189702 | -2.087271230029 | 0.518942710730  |
| H | 1.779881281769  | -3.289324466646 | 0.411665074292  |
| H | 2.643526384887  | -1.881429748140 | 1.238813091165  |
| O | -0.872798764243 | -0.170530799908 | 2.194733063057  |
| C | -0.695644542515 | 0.748145552196  | 3.166778773176  |
| C | 0.657865375936  | 1.115560833583  | 3.270928216412  |
| C | 1.334071512113  | 0.450889981566  | 2.256529106279  |
| H | -1.563585039836 | 1.035743485073  | 3.735180128585  |
| H | 2.381975278651  | 0.528915630373  | 2.010661248346  |
| H | 1.058676587469  | 1.822788298806  | 3.976987023188  |

29

TS53 -802.973631

|   |                 |                 |                |
|---|-----------------|-----------------|----------------|
| C | -0.605994315702 | 1.824158592968  | 0.786238488117 |
| C | -0.689813308139 | 0.423004296356  | 0.060013323420 |
| C | -0.306088428925 | -0.554405266856 | 1.168622561896 |
| C | -0.220312628898 | 0.179781453818  | 2.364042679368 |
| C | -0.388888317054 | 1.555035060539  | 2.173160951938 |
| H | -0.026325273933 | -0.295857302039 | 3.317673152418 |
| O | -0.733146894831 | 2.931331468290  | 0.187955465072 |
| C | -0.128222120875 | -1.955339281648 | 1.034998494194 |

|   |                 |                 |                 |
|---|-----------------|-----------------|-----------------|
| H | -1.727175815400 | 0.281945948362  | -0.266929249780 |
| H | -0.351913016895 | 2.324044978894  | 2.930266199301  |
| O | 0.055253391816  | -2.611877038310 | 2.248213459677  |
| O | -0.075630702131 | -2.611752981689 | -0.049274528806 |
| C | 0.268722097882  | -4.049799062996 | 2.183567050416  |
| H | 0.381962235962  | -4.365037454713 | 3.220541625253  |
| H | -0.587479049620 | -4.545695619552 | 1.718871719353  |
| H | 1.167729991660  | -4.285081560572 | 1.606570480177  |
| C | -0.711008370280 | -0.356648676377 | -3.495612497395 |
| C | -0.309302939789 | -0.677664753521 | -2.257720041916 |
| C | 0.201789490269  | 0.315748030574  | -1.235803689660 |
| H | -0.350138730759 | -1.685843206670 | -1.852857221823 |
| H | -1.088357390747 | -1.132664092277 | -4.153380909991 |
| H | -0.703236816000 | 0.658215719678  | -3.878862497256 |
| O | 0.257206380950  | 1.676320515544  | -1.888944188759 |
| C | 1.426628242179  | 2.196277427612  | -1.658673730461 |
| C | 2.324735882978  | 1.296129750427  | -1.006262943937 |
| C | 1.623713127838  | 0.133524817370  | -0.805565519819 |
| H | 1.590960184321  | 3.211001766416  | -1.993680188416 |
| H | 1.964842031941  | -0.795760083401 | -0.372938596974 |
| H | 3.348087563802  | 1.513792473714  | -0.751681615061 |

29

TS54 -802.972466

|   |                 |                 |                 |
|---|-----------------|-----------------|-----------------|
| C | -1.362323387848 | 0.463366114753  | -0.134739245769 |
| C | -0.153834207969 | 0.861775733458  | 0.568071062524  |
| C | 1.086242652231  | 0.530884173981  | -0.187912381365 |
| C | 0.536976875209  | -0.436454097548 | -1.256767134381 |
| C | -0.863633835564 | -0.309178853414 | -1.278941717208 |
| H | 1.106600709346  | -0.650597030092 | -2.155513428699 |
| O | -2.566413017370 | 0.685525713389  | 0.186290155443  |
| C | 1.766305661148  | 1.796183562147  | -0.680213544602 |
| H | -0.153387620807 | 1.437004665802  | 1.486970135728  |
| H | -1.524693534232 | -0.769402263401 | -2.003153037237 |
| O | 1.304522367598  | 2.203187810055  | -1.893893224402 |
| O | 2.639119000228  | 2.396391186449  | -0.042907247181 |
| C | 1.817791021584  | 3.473358281581  | -2.413148020200 |
| H | 1.313968468850  | 3.610147702138  | -3.367337379295 |
| H | 1.574493299330  | 4.282385794739  | -1.720887823387 |
| H | 2.901120183146  | 3.416056777319  | -2.541997838193 |
| C | 2.087023596050  | -0.480139842031 | 0.483240476102  |
| C | 1.299595036417  | -1.683398896065 | 0.006910143045  |
| C | 0.249969407947  | -2.089311447792 | 0.886700073679  |
| H | 1.755202651843  | -2.432705280656 | -0.632189519883 |
| H | 3.065359394925  | -0.407172273490 | 0.005053208583  |
| H | 2.211886675384  | -0.363842106694 | 1.558151005286  |
| O | -0.687353813234 | -3.007797049532 | 0.419598218844  |

|   |                 |                 |                |
|---|-----------------|-----------------|----------------|
| C | -1.770174751439 | -2.962431999643 | 1.286215140145 |
| C | -1.547752545378 | -2.054393843470 | 2.285451377720 |
| C | -0.254866853857 | -1.474896552852 | 2.031693910185 |
| H | -2.585786678596 | -3.626102980129 | 1.058009256934 |
| H | 0.272786214326  | -0.784783664715 | 2.668060830443 |
| H | -2.226662996111 | -1.802153486222 | 3.081715371294 |

29

TS55 -802.972049

|   |                 |                 |                 |
|---|-----------------|-----------------|-----------------|
| C | -0.847997447701 | 0.736757532127  | 1.581054793733  |
| C | -0.738504591608 | -0.700805286919 | 1.220299134213  |
| C | 0.586163620103  | -0.874959859814 | 0.727599470083  |
| C | 1.105048419959  | 0.321891403361  | 0.246248965895  |
| C | 0.125865164462  | 1.447912119087  | 0.616358058686  |
| H | 2.131013936245  | 0.473609449408  | -0.060082361107 |
| O | -1.574499510051 | 1.276136819556  | 2.422615118049  |
| C | 1.207690433726  | -2.201126957002 | 0.556359424291  |
| H | -1.312518890686 | -1.481515573498 | 1.702667238219  |
| H | 0.562813377152  | 2.355951653673  | 1.030810052665  |
| O | 2.481483698008  | -2.119952455696 | 0.054013533673  |
| O | 0.659388304043  | -3.281207784636 | 0.818147388437  |
| C | 3.198704568874  | -3.381081921319 | -0.132089785156 |
| H | 4.161945068892  | -3.100073381152 | -0.553177797092 |
| H | 3.323039998095  | -3.886304562898 | 0.828636052128  |
| H | 2.646246836511  | -4.033289179019 | -0.812759051699 |
| C | -0.077020037755 | 3.627610820806  | -2.248008349760 |
| C | -0.703511887955 | 3.121916991611  | -1.175244606882 |
| C | -0.649731461591 | 1.694090702185  | -0.731042388784 |
| H | -1.303834978482 | 3.760243815969  | -0.530603486367 |
| H | -0.154171531332 | 4.682162419395  | -2.490558396282 |
| H | 0.521229088765  | 3.016485436229  | -2.917806671238 |
| O | -2.052040485777 | 1.217993640391  | -0.513942993437 |
| C | -1.979085208508 | -0.163355909130 | -0.737547628241 |
| C | -0.954769373592 | -0.454763117490 | -1.662692172285 |
| C | -0.059577326829 | 0.607798122498  | -1.648111521139 |
| H | -2.892032667162 | -0.706843603230 | -0.545032917649 |
| H | 0.765161112443  | 0.763866356207  | -2.328352786200 |
| H | -0.804422745191 | -1.414913846734 | -2.131438287233 |

29

TS56 -802.971982

|   |                |                 |                 |
|---|----------------|-----------------|-----------------|
| C | 2.382588666077 | 2.349461687063  | -0.110285373402 |
| C | 0.977499070785 | 2.068336189738  | -0.483231163192 |
| C | 0.816980378225 | 0.753378277487  | -0.896279604636 |
| C | 2.191445116242 | 0.069427772158  | -0.932945413296 |
| C | 3.074252407792 | 1.110957538993  | -0.391624934250 |
| H | 2.459922471898 | -0.295166975027 | -1.927941775166 |
| O | 2.839556013178 | 3.433507564817  | 0.358120318164  |

|   |                 |                 |                 |
|---|-----------------|-----------------|-----------------|
| C | -0.320403639204 | 0.200509494496  | -1.644165668993 |
| H | 0.182592574488  | 2.799841715349  | -0.405310781415 |
| H | 4.121142821723  | 0.951606898115  | -0.159880980351 |
| O | -1.469405417914 | 0.917229624643  | -1.468995918570 |
| O | -0.273840618124 | -0.844005948556 | -2.319501967073 |
| C | -2.677375844152 | 0.402410985150  | -2.113291565493 |
| H | -3.448812708839 | 1.136710182813  | -1.891092422015 |
| H | -2.521475130467 | 0.308064416281  | -3.190289597963 |
| H | -2.932258850718 | -0.574713069063 | -1.694633125421 |
| C | 1.939690426185  | -1.179574682872 | 0.026968897814  |
| C | 0.786954502531  | -0.622476910902 | 0.789620027966  |
| C | -0.466651955090 | -1.281561496011 | 0.916840632450  |
| H | 0.998548144299  | 0.155158557761  | 1.519012332239  |
| H | 2.813259412988  | -1.418854162830 | 0.631900867047  |
| H | 1.654039833032  | -2.044914069710 | -0.572976929762 |
| O | -1.413518408702 | -0.695448515501 | 1.768955221520  |
| C | -2.561071106728 | -1.445181795031 | 1.680877260979  |
| C | -2.385980376334 | -2.487254821056 | 0.796733929038  |
| C | -1.045447760061 | -2.386999374897 | 0.305496577054  |
| H | -3.386257176812 | -1.129441041779 | 2.295587065795  |
| H | -0.568602611521 | -3.029157170861 | -0.416394813027 |
| H | -3.118321521498 | -3.233379678868 | 0.536923274654  |

29

TS57 -802.970984

|   |                 |                 |                 |
|---|-----------------|-----------------|-----------------|
| C | -1.028043014473 | 1.682495798089  | 0.213204688158  |
| C | -0.659451703299 | 0.193002152472  | 0.350314583620  |
| C | -1.624034679359 | -0.498614711364 | -0.410083467989 |
| C | -2.464886866392 | 0.469932795055  | -1.133946372731 |
| C | -2.118132755038 | 1.743677770709  | -0.799884124416 |
| H | -3.234689484425 | 0.172735100824  | -1.833838040358 |
| O | -0.528026162256 | 2.610839672886  | 0.862833660385  |
| C | -1.473322317366 | -1.882637154218 | -0.603592213188 |
| H | -0.265991257883 | -0.179622575287 | 1.287918269351  |
| H | -2.537964096440 | 2.667969401251  | -1.167283374307 |
| O | -2.386679155238 | -2.515464733850 | -1.411924901725 |
| O | -0.439970866698 | -2.491957285466 | -0.148254714733 |
| C | -2.212820264676 | -3.950290205056 | -1.616723294099 |
| H | -3.061077563430 | -4.252175937996 | -2.228585074064 |
| H | -1.271111601386 | -4.154350982542 | -2.132845326922 |
| H | -2.218205111516 | -4.475174112187 | -0.657931832743 |
| C | 1.310983608493  | -1.368903133866 | -0.814419698803 |
| C | 1.164483726255  | 0.003997574516  | -0.536533628862 |
| C | 2.035230645160  | 0.627610644122  | 0.477346152949  |
| H | 0.929523755006  | 0.655784456821  | -1.377285215270 |
| H | 1.034407734216  | -1.767225923799 | -1.781976072642 |
| H | 1.938311746332  | -1.998764606536 | -0.194864779681 |



|   |                |                 |                |
|---|----------------|-----------------|----------------|
| O | 2.473438145170 | 1.912887746673  | 0.197027985955 |
| C | 3.244606769738 | 2.328945644394  | 1.272219633228 |
| C | 3.303425640960 | 1.334387958427  | 2.211451840422 |
| C | 2.519889230395 | 0.233476607434  | 1.700569353946 |
| H | 3.650914993546 | 3.322464454647  | 1.207535829491 |
| H | 2.335301444418 | -0.711684138041 | 2.186748884736 |
| H | 3.825346435974 | 1.375255645275  | 3.153457477029 |

29

TS58 -802.969168

|   |                 |                 |                 |
|---|-----------------|-----------------|-----------------|
| C | -0.688684232824 | 0.226956030245  | -1.032997599788 |
| C | 0.249432164535  | -0.133787192285 | -2.053756051357 |
| C | 1.039098283830  | -1.199743041009 | -1.556620907453 |
| C | 0.738931415881  | -1.505699615043 | -0.227316582207 |
| C | -0.223591085794 | -0.508755310352 | 0.271814061225  |
| H | 1.209717661621  | -2.282408277933 | 0.357688437235  |
| O | -1.710623059010 | 0.967603689615  | -1.096310068183 |
| C | 2.043625219953  | -1.907641324193 | -2.387181811205 |
| H | 0.286955533312  | 0.274869016219  | -3.051945112183 |
| H | -1.046533989104 | -0.863238201779 | 0.890643477608  |
| O | 2.673011630795  | -2.914505233796 | -1.698259173030 |
| O | 2.308466500280  | -1.642736248397 | -3.566684885367 |
| C | 3.673622346454  | -3.687336478376 | -2.431419396438 |
| H | 4.042076031759  | -4.422399492989 | -1.718329831880 |
| H | 3.215086031215  | -4.174538968445 | -3.295433221923 |
| H | 4.479557108743  | -3.033506700734 | -2.773849212317 |
| C | 0.658148490205  | 0.606336529872  | 1.123173078610  |
| C | 0.007551516803  | 1.105316186973  | 2.329490379435  |
| C | -1.183552992315 | 1.824530210437  | 2.394220727054  |
| H | 0.447872841228  | 0.851230868012  | 3.291111381994  |
| H | 1.613776590245  | 0.150883722922  | 1.379742907349  |
| H | 0.848690560059  | 1.381492092249  | 0.364329252457  |
| O | -1.692232726190 | 2.099372926458  | 3.689138412210  |
| C | -2.848015105598 | 2.813376325121  | 3.523474715875  |
| C | -3.111850772053 | 3.017132770863  | 2.181842823837  |
| C | -2.055043493980 | 2.405600867350  | 1.453416036602  |
| H | -3.360330927165 | 3.109640113519  | 4.423376902471  |
| H | -1.943663781550 | 2.331574674735  | 0.380222648916  |
| H | -3.955547869295 | 3.546924509661  | 1.772498484147  |

29

TS59 -802.969008

|   |                 |                 |                 |
|---|-----------------|-----------------|-----------------|
| C | 0.889323626069  | 0.916961287373  | -1.787146343827 |
| C | 0.132069069507  | 0.806354868575  | -0.402268194120 |
| C | -1.061676987756 | -0.021030881026 | -0.721928930612 |
| C | -1.023660698055 | -0.338525069847 | -2.093113698973 |
| C | 0.102937952991  | 0.192029414324  | -2.738699772723 |
| H | -1.809994574571 | -0.904188309056 | -2.579133205328 |

|   |                 |                 |                 |
|---|-----------------|-----------------|-----------------|
| O | 1.968617236998  | 1.562001896410  | -1.931939698225 |
| C | -2.094119913356 | -0.261910868517 | 0.230604286345  |
| H | -0.133392239913 | 1.813502148778  | -0.063849935963 |
| H | 0.356552750949  | 0.095829925748  | -3.783664006910 |
| O | -3.156927137136 | -1.005135778339 | -0.266417813156 |
| O | -2.083682733447 | 0.137125073681  | 1.425738708717  |
| C | -4.260972346062 | -1.249308109190 | 0.650365953304  |
| H | -4.972088157562 | -1.850787575473 | 0.084866555686  |
| H | -3.914436719143 | -1.786359933751 | 1.537634361001  |
| H | -4.715362466851 | -0.305840323419 | 0.965080746541  |
| C | 1.897931517900  | 1.888849954069  | 2.553066951590  |
| C | 0.923731672113  | 1.133486544364  | 2.026563928469  |
| C | 1.083768196104  | 0.261804013094  | 0.806875219504  |
| H | -0.092153693920 | 1.117372040394  | 2.413866320578  |
| H | 1.693505763683  | 2.524960516167  | 3.407362281564  |
| H | 2.906368904899  | 1.921775563562  | 2.150276308080  |
| O | 0.621902624739  | -1.111565597606 | 1.206749924314  |
| C | 1.492584771262  | -1.988954742551 | 0.756004536932  |
| C | 2.634728498161  | -1.385111072796 | 0.179657191520  |
| C | 2.432865691394  | -0.020946065594 | 0.261379260426  |
| H | 1.257892451133  | -3.033921381530 | 0.902098824768  |
| H | 3.081554902067  | 0.761613979539  | -0.104090998349 |
| H | 3.477750286974  | -1.902637418374 | -0.245253909726 |

29

TS60 -802.968780

|   |                 |                 |                 |
|---|-----------------|-----------------|-----------------|
| C | -0.887423705295 | 0.900784915554  | -0.881007332340 |
| C | -1.733988044893 | 1.507836971436  | 0.137422868034  |
| C | -1.067777260099 | 1.385864218230  | 1.350422995499  |
| C | 0.176471464429  | 0.689243785426  | 1.225769490220  |
| C | 0.287820300991  | 0.203581145368  | -0.110296084915 |
| H | 0.870545777199  | 0.525242562288  | 2.035868217503  |
| O | -1.009817847292 | 0.899067444147  | -2.124751066154 |
| C | -1.600093929860 | 1.949105648044  | 2.617809881830  |
| H | -2.688520240417 | 1.980256509122  | -0.034592700541 |
| H | 1.240476786701  | 0.182179478488  | -0.634807430135 |
| O | -0.754905218931 | 1.728597006917  | 3.673295682467  |
| O | -2.675752816608 | 2.549042594648  | 2.734617147146  |
| C | -1.170975934839 | 2.254926741508  | 4.973017428735  |
| H | -0.368613196383 | 1.987000272598  | 5.657471347284  |
| H | -1.294908429494 | 3.339058786370  | 4.917106596784  |
| H | -2.116227436718 | 1.799604113990  | 5.278249276459  |
| C | -0.236740355420 | -1.543093090063 | -0.159820816334 |
| C | 0.848090422162  | -2.364484606868 | -0.573913646832 |
| C | 1.420489494962  | -2.271491907986 | -1.861547143432 |
| H | 1.342016854845  | -3.020788113183 | 0.136677734884  |
| H | -0.622938135958 | -1.756360760714 | 0.832641745824  |

|   |                 |                 |                 |
|---|-----------------|-----------------|-----------------|
| H | -1.045759586871 | -1.427867407645 | -0.883189610177 |
| O | 2.518521040361  | -3.097026066502 | -2.157616450955 |
| C | 2.919171333827  | -2.794484786663 | -3.439865351411 |
| C | 2.125002610947  | -1.801126544254 | -3.969915896781 |
| C | 1.162049557570  | -1.459963914604 | -2.969453170876 |
| H | 3.754441437945  | -3.354884023754 | -3.823372183915 |
| H | 0.383663057981  | -0.710275376113 | -3.031672851555 |
| H | 2.217910954203  | -1.368157744966 | -4.952108661402 |

29

TS61 -802.967682

|   |                 |                 |                 |
|---|-----------------|-----------------|-----------------|
| C | -0.177914560153 | 2.931030777302  | -1.249651984470 |
| C | 0.463246525499  | 1.704843650269  | -1.829142614335 |
| C | -0.282525461775 | 0.604463733203  | -1.550385668686 |
| C | -1.546819783265 | 0.992741388888  | -0.783344511276 |
| C | -1.369810103976 | 2.454333632783  | -0.596286677197 |
| H | -2.450524957726 | 0.716452008321  | -1.337987471953 |
| O | 0.283457124334  | 4.106520322722  | -1.329185958995 |
| C | 0.049982701885  | -0.759343029499 | -1.987093679183 |
| H | 1.396676378878  | 1.718108663974  | -2.378188479756 |
| H | -2.078553565651 | 3.094358607748  | -0.085992714767 |
| O | -0.957811439223 | -1.655025185230 | -1.683111085702 |
| O | 1.090529351171  | -1.111481116469 | -2.559990777743 |
| C | -0.743324851308 | -3.041734828006 | -2.092175823652 |
| H | -1.642480309129 | -3.572085271996 | -1.783016412687 |
| H | -0.608993261705 | -3.099309440116 | -3.174803214733 |
| H | 0.143509582972  | -3.449187896370 | -1.600427878471 |
| C | -1.606666850993 | 0.258858087956  | 0.603708939943  |
| C | -0.261118458259 | 0.435639783957  | 1.195483572126  |
| C | 0.281345646991  | -0.442067507439 | 2.139103600924  |
| H | 0.340827961775  | 1.284569903133  | 0.883018408791  |
| H | -2.398561008836 | 0.743511477356  | 1.186584744047  |
| H | -1.862518478925 | -0.801331076780 | 0.493937633009  |
| O | 1.602611870119  | -0.220186965009 | 2.573297934320  |
| C | 1.919276657144  | -1.220551020926 | 3.448207935015  |
| C | 0.854819225798  | -2.092298212903 | 3.599026699287  |
| C | -0.193413756725 | -1.597971464585 | 2.775354950661  |
| H | 2.904548031850  | -1.186061393737 | 3.881000647144  |
| H | -1.179406172039 | -2.017159972779 | 2.654316147070  |
| H | 0.834886396546  | -2.966232333109 | 4.228376272070  |

29

TS62 -802.967581

|   |                 |                 |                |
|---|-----------------|-----------------|----------------|
| C | -1.141489830539 | -1.387903237399 | 0.294853614848 |
| C | -0.237386312651 | -2.308431436439 | 0.969093686760 |
| C | 0.718470843605  | -1.546726170679 | 1.641967754802 |
| C | 0.532886204069  | -0.149719710790 | 1.450775688540 |
| C | -0.518244992859 | 0.034439311101  | 0.491510608705 |

|   |                 |                 |                 |
|---|-----------------|-----------------|-----------------|
| H | 1.116623489692  | 0.622627271173  | 1.927893153173  |
| O | -2.164965573947 | -1.626685240777 | -0.383771413112 |
| C | 1.774053864428  | -2.155330560796 | 2.490568293337  |
| H | -0.317863516025 | -3.384512460825 | 0.962739281691  |
| H | -1.198757003065 | 0.876286112450  | 0.584541606407  |
| O | 2.582343184508  | -1.209590762819 | 3.066914142496  |
| O | 1.931865448261  | -3.368949321378 | 2.672513752227  |
| C | 3.651430343838  | -1.698796646971 | 3.936362987098  |
| H | 4.169244530137  | -0.805042744857 | 4.278853037545  |
| H | 3.228223512900  | -2.253454647928 | 4.777288052605  |
| H | 4.323189744428  | -2.352846217052 | 3.375175947205  |
| C | 0.214908837752  | 0.226013751070  | -1.120089040690 |
| C | -0.822271248559 | 0.612764093982  | -2.020043720298 |
| C | -0.998567014994 | 1.936332898247  | -2.480458085076 |
| H | -1.604690575450 | -0.102672277005 | -2.257079241570 |
| H | 0.591134745278  | -0.793204091441 | -1.258837651055 |
| H | 1.021094033034  | 0.946182771353  | -0.992647889745 |
| O | -2.141088446724 | 2.205457689916  | -3.250835511803 |
| C | -2.113099507439 | 3.539014252250  | -3.580665933574 |
| C | -0.994765430482 | 4.141809549274  | -3.044648892736 |
| C | -0.277325819808 | 3.125065361520  | -2.343615196456 |
| H | -2.928367423684 | 3.899850538437  | -4.183585303377 |
| H | 0.652347346508  | 3.242228495767  | -1.810091803951 |
| H | -0.722584721870 | 5.179432710522  | -3.144616722599 |

29

TS63 -802.966954

|   |                 |                 |                 |
|---|-----------------|-----------------|-----------------|
| C | -1.140926463472 | 1.997045419943  | -0.488700271765 |
| C | -0.164728774574 | 2.361493197522  | -1.488651133246 |
| C | 0.375866804021  | 1.176164984569  | -2.021460570049 |
| C | -0.114179825671 | 0.026776990597  | -1.382196962720 |
| C | -0.984231213137 | 0.448198846449  | -0.273773670538 |
| H | 0.124581717449  | -0.987620379634 | -1.666161541244 |
| O | -1.943591723599 | 2.697166993741  | 0.170404872431  |
| C | 1.357088066013  | 1.174977955388  | -3.135610898455 |
| H | 0.095411588572  | 3.369000298459  | -1.775869112230 |
| H | -1.936078340967 | -0.072520980656 | -0.162242407802 |
| O | 1.719761855561  | -0.095139905181 | -3.506464930314 |
| O | 1.814191013216  | 2.185294499307  | -3.684204899235 |
| C | 2.671188435156  | -0.211183069088 | -4.610272877785 |
| H | 2.819948480115  | -1.280699713589 | -4.745650528483 |
| H | 2.257373219788  | 0.244792788949  | -5.512958324890 |
| H | 3.609434908439  | 0.287058584058  | -4.354198270504 |
| C | -0.232251758046 | 0.407502876223  | 1.162857767936  |
| C | 0.100262690666  | -0.955393473150 | 1.537589269533  |
| C | -0.336130650665 | -1.566210234266 | 2.719151319810  |
| H | 0.684662424034  | -1.561370892661 | 0.849796069760  |

|   |                 |                 |                |
|---|-----------------|-----------------|----------------|
| H | 0.650994902430  | 1.041229697721  | 0.984353749297 |
| H | -0.878556101427 | 0.912993708142  | 1.885796573770 |
| O | -0.019981578934 | -2.925352438608 | 2.912404836233 |
| C | -0.573790587741 | -3.309661850089 | 4.108136718322 |
| C | -1.238032041664 | -2.250729252555 | 4.695976765244 |
| C | -1.087672034260 | -1.135505138995 | 3.823305859667 |
| H | -0.413811129709 | -4.332545462353 | 4.403011907513 |
| H | -1.469934392095 | -0.138692999381 | 3.974194562251 |
| H | -1.760683214299 | -2.273280740468 | 5.637700989419 |

29

TS64 -802.966751

|   |                 |                 |                 |
|---|-----------------|-----------------|-----------------|
| C | 0.003081172828  | 2.004427086890  | 0.514479789259  |
| C | 0.274165608672  | 0.484727945118  | 0.619585928207  |
| C | 1.637986600861  | 0.344498604033  | 0.037056052191  |
| C | 2.080446100787  | 1.594298762874  | -0.465008799112 |
| C | 1.103264676054  | 2.565436084081  | -0.289473553568 |
| H | 3.033982283419  | 1.732752622104  | -0.957469703024 |
| O | -0.954142859085 | 2.608175068910  | 1.032941589614  |
| C | 2.322944504782  | -0.928184065441 | 0.021835062278  |
| H | 0.142530410319  | 0.092866317545  | 1.628202089593  |
| H | 1.150617142325  | 3.601503168303  | -0.593737215786 |
| O | 3.578607683361  | -0.878207468850 | -0.536065177876 |
| O | 1.813182128699  | -1.991261417894 | 0.444677987299  |
| C | 4.312396372515  | -2.139474809043 | -0.612541737174 |
| H | 5.275638277188  | -1.880911482059 | -1.048385308258 |
| H | 4.435287838239  | -2.567857023411 | 0.385164873347  |
| H | 3.775522650333  | -2.851369377776 | -1.244562368479 |
| C | -0.377395617058 | 0.150413610553  | -1.727915075018 |
| C | -0.680534160325 | -0.312155945385 | -0.364756545928 |
| C | -2.142745138886 | -0.304833084607 | -0.062491218431 |
| H | -0.317924627467 | -1.353347329471 | -0.227314814258 |
| H | 0.438839281829  | 0.816617148456  | -1.964617112140 |
| H | -1.029564587760 | -0.160538559418 | -2.541994381482 |
| O | -2.666798498416 | -1.451425719926 | 0.529744294408  |
| C | -4.018568500647 | -1.224902158481 | 0.730871440103  |
| C | -4.354116835084 | 0.025144750403  | 0.280058107662  |
| C | -3.142795947377 | 0.619583696326  | -0.230293301465 |
| H | -4.570181696601 | -2.024804279328 | 1.192666416248  |
| H | -3.018263313404 | 1.617858940593  | -0.617859824357 |
| H | -5.331394340412 | 0.477377327360  | 0.317713418158  |

29

TS65 -802.965901

|   |                |                 |                 |
|---|----------------|-----------------|-----------------|
| C | 1.222229998489 | 0.459553541267  | 0.804474129355  |
| C | 1.520617436914 | -0.542076586667 | -0.189372467182 |
| C | 1.066252448743 | -0.072842751051 | -1.436710057429 |
| C | 0.472273864819 | 1.195813303864  | -1.351903091317 |

|   |                 |                 |                 |
|---|-----------------|-----------------|-----------------|
| C | 0.399497281412  | 1.581361539234  | 0.064384438418  |
| H | 0.065899773282  | 1.749929064294  | -2.185778489245 |
| O | 1.557608727266  | 0.506638036571  | 2.018052830879  |
| C | 1.242348364226  | -0.841175410943 | -2.694005936186 |
| H | 2.035056415178  | -1.473375880961 | -0.007482022244 |
| H | 0.756828182917  | 2.578157684881  | 0.330977549181  |
| O | 0.778383010280  | -0.159273870638 | -3.791846955521 |
| O | 1.743626783386  | -1.969774937981 | -2.778100043671 |
| C | 0.930675688075  | -0.818343892194 | -5.087181396602 |
| H | 0.522929549150  | -0.116517865476 | -5.812296768879 |
| H | 1.986449003715  | -1.018202641449 | -5.286012045285 |
| H | 0.379015946744  | -1.761722632052 | -5.099446339201 |
| C | -1.186515113763 | 1.526451047825  | 0.502109640048  |
| C | -1.279596668730 | 1.154858023394  | 1.907162069298  |
| C | -1.791418973438 | -0.057360332395 | 2.368825206251  |
| H | -0.796804900409 | 1.786140735873  | 2.647495602091  |
| H | -1.700512370552 | 0.823140298786  | -0.155291882009 |
| H | -1.555318704140 | 2.535602179560  | 0.299443501286  |
| O | -1.706368828650 | -0.314551856614 | 3.750505672440  |
| C | -2.237776973866 | -1.554698355368 | 3.970666083954  |
| C | -2.669700335279 | -2.117402883043 | 2.781803505487  |
| C | -2.392381094963 | -1.172520265669 | 1.759164804911  |
| H | -2.242746955711 | -1.901279053376 | 4.989895600439  |
| H | -2.574636867264 | -1.289073348311 | 0.702965720202  |
| H | -3.119897388678 | -3.089050031919 | 2.666009610254  |

29

TS66 -802.965028

|   |                 |                 |                 |
|---|-----------------|-----------------|-----------------|
| C | -1.685971617535 | -0.663519115341 | -1.492518914753 |
| C | -0.877970236433 | -0.177717596389 | -0.120010152914 |
| C | -0.086259641290 | -1.398320898240 | 0.245963205954  |
| C | -0.341225100854 | -2.394623235232 | -0.683074461221 |
| C | -1.240047518050 | -1.985190975185 | -1.703318873102 |
| H | 0.086922062557  | -3.386914715737 | -0.609231080787 |
| O | -2.486640609922 | 0.100324180600  | -2.093347247580 |
| C | 0.651698352188  | -1.516214903377 | 1.477349463284  |
| H | -1.649604269856 | 0.097729101275  | 0.602986955804  |
| H | -1.636290798180 | -2.612252192701 | -2.488692781587 |
| O | 1.353071501246  | -2.714521240106 | 1.561627633898  |
| O | 0.678119652522  | -0.683363288893 | 2.408182576790  |
| C | 2.064990927515  | -2.958262567411 | 2.808548910986  |
| H | 2.533326606860  | -3.933882733621 | 2.682741038305  |
| H | 2.817946792358  | -2.183973513621 | 2.978651773723  |
| H | 1.369424047034  | -2.966409538153 | 3.652288454311  |
| C | 1.571255200442  | 1.683343938014  | -2.299933164923 |
| C | 1.055259751871  | 0.759459192223  | -1.464001764571 |
| C | -0.146059863474 | 0.985589522280  | -0.648154547600 |

|   |                 |                 |                 |
|---|-----------------|-----------------|-----------------|
| H | 1.503165931278  | -0.223464219482 | -1.360782044471 |
| H | 2.444810279628  | 1.457896894137  | -2.901939767181 |
| H | 1.138849194296  | 2.674433501490  | -2.412636804136 |
| O | 0.771308802043  | 1.943401386818  | 0.968515403485  |
| C | 0.140675177219  | 3.029723045015  | 0.983883500126  |
| C | -0.891104823021 | 3.235443944453  | -0.038903977868 |
| C | -1.002154461643 | 2.174347582448  | -0.868069977570 |
| H | 0.362371947944  | 3.785057526471  | 1.741139469650  |
| H | -1.757658765552 | 2.040392366798  | -1.648546160538 |
| H | -1.500467106590 | 4.126569052437  | -0.083041756276 |

29

TS67 -802.964959

|   |                 |                 |                 |
|---|-----------------|-----------------|-----------------|
| C | -1.098609546197 | -0.845473907934 | 1.590997427883  |
| C | -0.105471509207 | -0.829883098245 | 0.267777857266  |
| C | 1.219789359733  | -0.461305649756 | 0.863165072589  |
| C | 1.083942973812  | -0.296734368375 | 2.244634219722  |
| C | -0.235070979150 | -0.482967795446 | 2.681097953715  |
| H | 1.917919588961  | -0.059796693928 | 2.893642057066  |
| O | -2.281656848887 | -1.200591081954 | 1.526624282728  |
| C | 2.382022346934  | -0.298234214592 | 0.031938731782  |
| H | -0.167117280221 | -1.848071308764 | -0.122422795998 |
| H | -0.567977987438 | -0.532883670455 | 3.708132488368  |
| O | 3.534411892344  | -0.054614063296 | 0.755936926242  |
| O | 2.394509429277  | -0.374354198932 | -1.220923362248 |
| C | 4.770460625523  | 0.072993121334  | -0.007124745751 |
| H | 5.539044016458  | 0.288307705877  | 0.733711345914  |
| H | 4.989471148707  | -0.858717117317 | -0.535111398323 |
| H | 4.690211158197  | 0.884433123985  | -0.735116020006 |
| C | -0.318360659272 | 2.493743141390  | -1.481386753360 |
| C | -0.234601419907 | 1.563993663910  | -0.498297194828 |
| C | -0.560311309386 | 0.170790991051  | -0.682795028427 |
| H | 0.140403702190  | 1.836937620901  | 0.484029302347  |
| H | -0.060289051181 | 3.529307528752  | -1.289296949602 |
| H | -0.619489687104 | 2.237987317567  | -2.493286897045 |
| O | -3.176157237002 | 1.212702655701  | -0.226865310816 |
| C | -3.502809734284 | 0.701646257581  | -1.307857110772 |
| C | -2.583718545090 | -0.094397631305 | -2.163724319668 |
| C | -1.280749363768 | -0.312063129856 | -1.876109416191 |
| H | -4.523990849874 | 0.824044427008  | -1.702233403981 |
| H | -0.693257484681 | -0.963076273259 | -2.521672923582 |
| H | -3.016380668895 | -0.548689990024 | -3.049887094488 |

29

TS68 -802.963201

|   |                 |                |                 |
|---|-----------------|----------------|-----------------|
| C | -1.108697484689 | 1.685695304660 | -1.054928979144 |
| C | -0.329189595370 | 0.363149096782 | -1.304803533351 |
| C | 0.899342783685  | 0.513666461980 | -0.572010564060 |

|   |                 |                 |                 |
|---|-----------------|-----------------|-----------------|
| C | 0.909394981536  | 1.816546262575  | 0.019021847251  |
| C | -0.217745254116 | 2.557799861240  | -0.325071467301 |
| H | 1.723512737495  | 2.170112470218  | 0.640008831755  |
| O | -2.327835880097 | 1.811763198045  | -1.335837166141 |
| C | 1.878893594847  | -0.529081364673 | -0.542653346087 |
| H | -0.266390495451 | 0.027038485095  | -2.339986194588 |
| H | -0.481798450018 | 3.544687429973  | 0.021825184934  |
| O | 3.020342103365  | -0.218473242995 | 0.164320966777  |
| O | 1.712560967347  | -1.651178018682 | -1.086049910775 |
| C | 4.028213897782  | -1.267983985438 | 0.266922433652  |
| H | 4.830609638695  | -0.834085112239 | 0.861716694057  |
| H | 3.609456250224  | -2.149947375634 | 0.758305607272  |
| H | 4.387828039038  | -1.550058844928 | -0.725972280947 |
| C | -2.536841306390 | -0.783478440071 | -1.348027639948 |
| C | -1.359535089456 | -0.930382977946 | -0.588510697733 |
| C | -1.441238730361 | -0.752239402511 | 0.876764467355  |
| H | -0.656242236596 | -1.722172532787 | -0.887058226460 |
| H | -2.528608536374 | -0.978947918482 | -2.416088876148 |
| H | -3.471148076561 | -0.448561487406 | -0.914263764105 |
| O | -0.572533437373 | -1.519136084552 | 1.641063990970  |
| C | -0.772730685239 | -1.165454164989 | 2.965712435800  |
| C | -1.739733427347 | -0.198434278271 | 3.047531698418  |
| C | -2.170726723115 | 0.071970678189  | 1.696418744325  |
| H | -0.168358718556 | -1.681573555684 | 3.690486827788  |
| H | -2.899846199022 | 0.800813578944  | 1.379461219803  |
| H | -2.101076633432 | 0.270652943432  | 3.947808163267  |

29

TS69 -802.961997

|   |                 |                 |                 |
|---|-----------------|-----------------|-----------------|
| C | -2.540460962059 | 0.419331475268  | 0.389375384876  |
| C | -1.145392188733 | 0.413671180637  | 0.055639687159  |
| C | -0.558981873099 | -0.923468768905 | 0.378005439131  |
| C | -1.730171520763 | -1.713550367033 | 0.941847876268  |
| C | -2.837338404670 | -0.950826041605 | 0.969806659820  |
| H | -1.625483240707 | -2.742832630055 | 1.262865153011  |
| O | -3.400267634284 | 1.336220307204  | 0.258714471923  |
| C | -0.044576053360 | -1.303185078564 | -0.974613235185 |
| H | -0.635159744412 | 1.196933021999  | -0.484907485456 |
| H | -3.821242607151 | -1.230243700400 | 1.325294512305  |
| O | -0.794355472562 | -2.041906277432 | -1.799366470148 |
| O | 1.132276725926  | -0.900256923899 | -1.275106995711 |
| C | -0.403828943858 | -2.103721724820 | -3.213474664735 |
| H | -1.140145921544 | -2.756658839825 | -3.675739549678 |
| H | -0.445885048584 | -1.100480990857 | -3.643737768517 |
| H | 0.604498935554  | -2.511816616396 | -3.308786145149 |
| C | 0.731995145479  | -1.001000424370 | 1.300131302948  |
| C | 1.897383821294  | -0.469220336051 | 0.532237076788  |



|   |                |                 |                 |
|---|----------------|-----------------|-----------------|
| C | 2.158994558819 | 0.925243104408  | 0.534182347412  |
| H | 2.732119241152 | -1.118231630726 | 0.290699412990  |
| H | 0.901657299193 | -2.045495931546 | 1.576361132581  |
| H | 0.522838700680 | -0.424329086636 | 2.201242291007  |
| O | 3.311840660203 | 1.379233438085  | -0.122510594001 |
| C | 3.304015201404 | 2.748694685317  | -0.044321867864 |
| C | 2.194241061440 | 3.189934988859  | 0.642878308617  |
| C | 1.457517432203 | 2.023730589901  | 1.020367580577  |
| H | 4.133879569413 | 3.257561006792  | -0.504048808998 |
| H | 0.532866684758 | 1.982045126267  | 1.573810912945  |
| H | 1.939857155885 | 4.215009546069  | 0.853523076866  |

29

TS70 -802.961510

|   |                 |                 |                 |
|---|-----------------|-----------------|-----------------|
| C | 1.136954838424  | -1.444647089298 | -0.516023906360 |
| C | 0.115119025673  | -1.900904921284 | 0.309834937608  |
| C | -1.039723802526 | -1.038668187786 | 0.135463678264  |
| C | -0.819306573017 | -0.026813126629 | -0.764534888556 |
| C | 0.570803200746  | -0.225896265617 | -1.304517907855 |
| H | -1.542426136046 | 0.700440132566  | -1.103226508255 |
| O | 2.389972938500  | -1.757680646359 | -0.640827957125 |
| C | -2.308556348847 | -1.254228960340 | 0.869031377613  |
| H | 0.171756946504  | -2.725825643128 | 1.003430204039  |
| H | 0.557587850937  | -0.452012066111 | -2.378840427579 |
| O | -3.289113557344 | -0.354333059793 | 0.514222679511  |
| O | -2.502801834127 | -2.131817004105 | 1.721368751494  |
| C | -4.577044743795 | -0.494884708834 | 1.186290790139  |
| H | -5.206725653768 | 0.285435394996  | 0.761614514173  |
| H | -4.999807510328 | -1.484729486748 | 0.996043910729  |
| H | -4.459543054349 | -0.359002136941 | 2.264644982975  |
| C | 3.047581664953  | -0.049443314706 | 1.511953342370  |
| C | 2.204479536476  | 1.022986553738  | 1.452454741717  |
| C | 1.661796269998  | 1.510691162466  | 0.229902103959  |
| H | 1.954344217691  | 1.597606755331  | 2.338386030544  |
| H | 3.445632573522  | -0.356759110591 | 2.474520570170  |
| H | 3.293558764573  | -0.652698580576 | 0.632957610682  |
| O | 1.087301066798  | 2.721629333584  | 0.259516224512  |
| C | 0.757168922742  | 3.118703628769  | -1.081014923208 |
| C | 1.118547488122  | 2.154087832752  | -1.939226050926 |
| C | 1.614280732295  | 0.967956967091  | -1.157203182809 |
| H | 0.294025893005  | 4.085780406538  | -1.158377816574 |
| H | 2.563707690389  | 0.507131482657  | -1.463024697877 |
| H | 0.981581981967  | 2.162473875600  | -3.008803983816 |

29

TS71 -802.961354

|   |                 |                 |                 |
|---|-----------------|-----------------|-----------------|
| C | -0.780661809238 | -0.982520590769 | 0.436326206531  |
| C | -1.600737973456 | 0.041523582836  | -0.164704278128 |

|   |                 |                 |                 |
|---|-----------------|-----------------|-----------------|
| C | -0.950652561183 | 1.268854741416  | 0.018616425666  |
| C | 0.289021791681  | 1.140660137399  | 0.687207170148  |
| C | 0.540728320220  | -0.261487644755 | 0.896409967145  |
| H | 0.930834236134  | 1.962989167505  | 0.965354530779  |
| O | -0.974643734165 | -2.215975144012 | 0.560642564035  |
| C | -1.540784142146 | 2.555809480978  | -0.429183800890 |
| H | -2.556264942772 | -0.114553590969 | -0.640483239321 |
| H | 0.961394565633  | -0.598770543533 | 1.846735142431  |
| O | -0.754506659135 | 3.631075253813  | -0.099974848849 |
| O | -2.613795729176 | 2.678425487011  | -1.033854673343 |
| C | -1.258360487892 | 4.951625246837  | -0.472361864540 |
| H | -0.506390245042 | 5.653349278519  | -0.116320104628 |
| H | -1.377400685623 | 5.019601696290  | -1.556693730373 |
| H | -2.223753753106 | 5.134351431122  | 0.006088170756  |
| C | 3.040175654479  | -2.357847028823 | 2.193858651965  |
| C | 2.455245882198  | -2.989139563670 | 1.143968673203  |
| C | 1.924428392109  | -2.298415533169 | 0.008764199424  |
| H | 2.344036788272  | -4.068334458808 | 1.136511461628  |
| H | 3.408969055371  | -2.919869107875 | 3.044029390156  |
| H | 3.178059028624  | -1.280589390223 | 2.222733541132  |
| O | 1.381677337695  | -3.029556833762 | -0.995530539766 |
| C | 0.926376353024  | -2.149617666448 | -1.994593100870 |
| C | 1.140839900866  | -0.866280873487 | -1.622582235845 |
| C | 1.732453098782  | -0.877916737968 | -0.250386555625 |
| H | 0.468302465199  | -2.618324847171 | -2.846337088265 |
| H | 2.572824066529  | -0.223515742195 | -0.034482434179 |
| H | 0.874913556087  | 0.020078933834  | -2.173388412626 |

29

TS72 -802.960836

|   |                 |                 |                 |
|---|-----------------|-----------------|-----------------|
| C | -1.597784435649 | -1.168230405204 | 0.745706639698  |
| C | -1.623650990012 | -1.014225626966 | -0.659379671270 |
| C | -1.220486165386 | 0.324793379176  | -0.951020574245 |
| C | -1.010715984982 | 1.089201097839  | 0.189926201348  |
| C | -1.376291818853 | 0.253418792909  | 1.369329265042  |
| H | -0.778311878187 | 2.144728826901  | 0.199579683663  |
| O | -1.594317845013 | -2.218814597488 | 1.472811312789  |
| C | -1.057324068446 | 0.823214180463  | -2.337480951050 |
| H | -1.748095718419 | -1.804154999543 | -1.384028212545 |
| H | -2.359348081738 | 0.598810665005  | 1.727533781152  |
| O | -0.739609027967 | 2.160986980047  | -2.386037799972 |
| O | -1.178383597879 | 0.139211390275  | -3.362865404481 |
| C | -0.569678055821 | 2.745426977714  | -3.713329625911 |
| H | -0.354088616822 | 3.797502967148  | -3.534852201629 |
| H | 0.256477756365  | 2.259477366372  | -4.239029485136 |
| H | -1.484821761156 | 2.626939203012  | -4.298911153605 |
| C | -0.535243071692 | 0.157328557385  | 2.719484850505  |

|   |                 |                 |                 |
|---|-----------------|-----------------|-----------------|
| C | 0.919410572423  | 0.351798029397  | 2.617282231204  |
| C | 1.769165856576  | -0.404248586835 | 1.836132808932  |
| H | 1.370128471046  | 1.210131468248  | 3.111021179705  |
| H | -0.937684533195 | 0.856814672398  | 3.453364674663  |
| H | -0.783875826475 | -0.872566320776 | 3.035459433217  |
| O | 3.123361785718  | 0.014709677945  | 1.732131653521  |
| C | 3.748324303450  | -0.858473187594 | 0.897152027636  |
| C | 2.872542646212  | -1.840071031238 | 0.451842347958  |
| C | 1.620090765871  | -1.566643283706 | 1.044315091903  |
| H | 4.792900509924  | -0.676735119683 | 0.705566278213  |
| H | 0.702294149604  | -2.130683271444 | 0.949141887890  |
| H | 3.112844023539  | -2.650937350627 | -0.214732878438 |

29

TS73 -802.960773

|   |                 |                 |                 |
|---|-----------------|-----------------|-----------------|
| C | 0.281960276493  | -1.027755986589 | -0.459919711913 |
| C | -0.975646024767 | -0.643892147776 | -0.914877785219 |
| C | -1.840731383524 | -0.095119538994 | 0.076735864820  |
| C | -1.322716055261 | -0.052329574411 | 1.351512866980  |
| C | 0.012994370436  | -0.635963268664 | 1.438158214490  |
| H | -1.781973789841 | 0.487153273134  | 2.170555585761  |
| O | 1.245685652133  | -1.708167925537 | -0.824229414329 |
| C | -3.185755733702 | 0.412810416585  | -0.293764726653 |
| H | -1.286350732824 | -0.848224376574 | -1.930625051609 |
| H | 0.121573950453  | -1.714603577486 | 1.555935760396  |
| O | -3.851181176596 | 0.964683263783  | 0.772255452913  |
| O | -3.678845860156 | 0.359563298022  | -1.428110596577 |
| C | -5.189376013560 | 1.490155067595  | 0.511065452465  |
| H | -5.529127350231 | 1.888691651356  | 1.465213477663  |
| H | -5.146540348984 | 2.274213441613  | -0.248932037338 |
| H | -5.848004218093 | 0.690185311044  | 0.164147585116  |
| C | 1.067883806038  | 0.178905520513  | 2.196683660440  |
| C | 1.428829431147  | 0.703886092429  | 0.855510729625  |
| C | 2.644402813834  | 0.397589877468  | 0.197365668347  |
| H | 0.807671815933  | 1.491555007421  | 0.441103754141  |
| H | 0.648222360074  | 0.909093795289  | 2.886470390786  |
| H | 1.839603992000  | -0.416205375654 | 2.680923669214  |
| O | 2.835382020457  | 0.933856931131  | -1.080473655312 |
| C | 4.001539410839  | 0.406503710576  | -1.571303479797 |
| C | 4.564431267202  | -0.454639693565 | -0.656415291258 |
| C | 3.691908553637  | -0.467950116723 | 0.475516560228  |
| H | 4.295507719103  | 0.730386649316  | -2.554704282099 |
| H | 3.811391242654  | -1.050666141381 | 1.374644315636  |
| H | 5.474429187340  | -1.016292282804 | -0.784659056473 |

29

TS74 -802.960731

|   |                 |                 |                 |
|---|-----------------|-----------------|-----------------|
| C | -0.779647857233 | -0.701638861350 | -1.584205072886 |
|---|-----------------|-----------------|-----------------|

|   |                 |                 |                 |
|---|-----------------|-----------------|-----------------|
| C | 0.486183173681  | -1.296628183933 | -1.633117882917 |
| C | 1.340267354014  | -0.572192509392 | -0.721663017131 |
| C | 0.704922074070  | 0.485437853254  | -0.094692595726 |
| C | -0.640886505319 | 0.614697787673  | -0.749977324497 |
| H | 1.173149123234  | 1.202735610673  | 0.562900345373  |
| O | -1.965416494560 | -1.055832698628 | -1.945678234841 |
| C | 2.749585380602  | -0.963414569286 | -0.482238961486 |
| H | 0.756343404489  | -2.206033665346 | -2.146157576459 |
| H | -0.572790647876 | 1.435892996331  | -1.479386129548 |
| O | 3.398593989373  | -0.109018701460 | 0.378414764401  |
| O | 3.311604382717  | -1.947882529678 | -0.980913702490 |
| C | 4.800281618249  | -0.405750993280 | 0.661908372363  |
| H | 5.125407067355  | 0.381051383570  | 1.340321209607  |
| H | 4.894071524799  | -1.389432755977 | 1.129259777851  |
| H | 5.383635108296  | -0.392809033899 | -0.262237457501 |
| C | -0.776204505264 | -1.556456829897 | 1.626477990372  |
| C | -1.610985846840 | -0.616745607341 | 2.157741481184  |
| C | -2.156522154186 | 0.440457430245  | 1.382094559877  |
| H | -1.831407774666 | -0.596039503775 | 3.219606496045  |
| H | -0.319069509248 | -2.296283030054 | 2.276527899392  |
| H | -0.578922945785 | -1.661732857411 | 0.564434964752  |
| O | -2.904733087136 | 1.362006892840  | 2.029218958156  |
| C | -3.236669012641 | 2.406944520209  | 1.112800284907  |
| C | -2.704663435731 | 2.136180638370  | -0.090238373935 |
| C | -2.011799803237 | 0.809297905537  | -0.030850585066 |
| H | -3.832299084351 | 3.199555309515  | 1.528550339971  |
| H | -2.586000791088 | 0.057888079960  | -0.709268883375 |
| H | -2.792535185287 | 2.732630040211  | -0.984615487548 |

29

TS75 -802.959772

|   |                 |                 |                 |
|---|-----------------|-----------------|-----------------|
| C | -1.538737643333 | -0.114510750305 | 0.685828867227  |
| C | -0.547699352171 | -0.565274550322 | 1.610634751246  |
| C | 0.607335068197  | 0.206944662391  | 1.408309937402  |
| C | 0.448786693774  | 1.145635192133  | 0.363071125559  |
| C | -0.837766911987 | 0.941583168904  | -0.223983100709 |
| H | 1.177646538508  | 1.888864182458  | 0.080201285199  |
| O | -2.717967813306 | -0.538260282847 | 0.487778412709  |
| C | 1.827100932384  | 0.056845144636  | 2.238136142935  |
| H | -0.670221905959 | -1.356622229897 | 2.333716078406  |
| H | -1.412621503492 | 1.778523287533  | -0.606124782952 |
| O | 2.827591776637  | 0.911414671162  | 1.847631347044  |
| O | 1.960541267557  | -0.739238947002 | 3.176453338635  |
| C | 4.073894177179  | 0.856402191518  | 2.608959881783  |
| H | 4.712962660437  | 1.616017911475  | 2.162722241843  |
| H | 3.883090425482  | 1.073740577805  | 3.662712036729  |
| H | 4.524839907061  | -0.135362841550 | 2.523107859091  |

|   |                 |                 |                 |
|---|-----------------|-----------------|-----------------|
| C | 0.870203590309  | 0.886867205081  | -3.489436914414 |
| C | 0.642619997259  | 0.191821213163  | -2.363927269124 |
| C | -0.706254196448 | -0.112728275610 | -1.815444247546 |
| H | 1.461333018716  | -0.170040064868 | -1.748038180845 |
| H | 1.883955169195  | 1.104152513695  | -3.807668814963 |
| H | 0.067850901244  | 1.253513413396  | -4.122716715167 |
| O | -0.789292983365 | -1.477571990240 | -1.327172402998 |
| C | -2.069640015822 | -1.895208605581 | -1.492871959409 |
| C | -2.793469936790 | -0.978428753082 | -2.276676876549 |
| C | -1.956084850339 | 0.100260371735  | -2.519785312388 |
| H | -2.328588513019 | -2.853353860175 | -1.077041860815 |
| H | -2.203235445008 | 1.009396534047  | -3.045614962646 |
| H | -3.825411774284 | -1.088602624669 | -2.564317430654 |

29

TS76 -802.959325

|   |                 |                 |                 |
|---|-----------------|-----------------|-----------------|
| C | 0.858451075604  | 1.222035946522  | 0.606412797024  |
| C | 0.031655469568  | 0.917467490562  | 1.689731692442  |
| C | -0.456442609278 | -0.429754638165 | 1.514743836610  |
| C | 0.034135426984  | -1.033403341420 | 0.379171820343  |
| C | 0.955239644584  | -0.056036901841 | -0.278271039263 |
| H | -0.112133778594 | -2.065977340438 | 0.098419959019  |
| O | 1.385561405195  | 2.323300983311  | 0.183787087743  |
| C | -1.366758016855 | -1.075543260926 | 2.489816784739  |
| H | -0.272465983908 | 1.593129445641  | 2.474205515538  |
| H | 1.983987005879  | -0.441502931690 | -0.299636910637 |
| O | -1.677514192781 | -2.370695933605 | 2.145805982534  |
| O | -1.819537943583 | -0.538541486364 | 3.509491825576  |
| C | -2.563896107233 | -3.093839266554 | 3.053073690842  |
| H | -2.700893996765 | -4.072465071964 | 2.596095236742  |
| H | -2.103057945696 | -3.184356576310 | 4.040083176505  |
| H | -3.518025752077 | -2.569799432475 | 3.150815305277  |
| C | 1.146416013120  | -1.086114589814 | -3.745120620507 |
| C | 0.425869341722  | -0.790928358558 | -2.652887004621 |
| C | 0.650747451771  | 0.398437161647  | -1.743018223481 |
| H | -0.393945522589 | -1.427434889610 | -2.330437172225 |
| H | 0.927071207445  | -1.978478577023 | -4.321666812264 |
| H | 1.967974153575  | -0.468359517234 | -4.095363450944 |
| O | -0.647320111224 | 1.167793243808  | -1.712142239193 |
| C | -0.403548860174 | 2.401699557022  | -2.154662720383 |
| C | 0.930165459189  | 2.600464699534  | -2.547650969855 |
| C | 1.609822108367  | 1.440868698209  | -2.229217863358 |
| H | -1.241304138107 | 3.082894674882  | -2.168215300257 |
| H | 2.668750791086  | 1.260311935855  | -2.336764198550 |
| H | 1.346035964119  | 3.529970628362  | -2.895864457491 |

29

TS77 -802.959023

|   |                 |                 |                 |
|---|-----------------|-----------------|-----------------|
| C | 2.711654364722  | -1.145705206101 | 0.561633960909  |
| C | 1.431606871022  | -1.655868624766 | 1.010788981240  |
| C | 0.322097423821  | -0.855582371320 | 0.507647926553  |
| C | 1.024708328753  | 0.337013450638  | -0.177910576432 |
| C | 2.379032145364  | 0.114506643869  | -0.151555932588 |
| H | 0.553032663300  | 1.299905821703  | -0.316304041099 |
| O | 3.860586622260  | -1.638662965482 | 0.734823730405  |
| C | -0.738296312575 | -0.479323261900 | 1.528179775901  |
| H | 1.307624553084  | -2.605651971665 | 1.516891038737  |
| H | 3.138825339942  | 0.767099759291  | -0.563480669579 |
| O | -0.369867199223 | 0.614040164799  | 2.248705383637  |
| O | -1.804505077372 | -1.082358056078 | 1.709581134858  |
| C | -1.259035386422 | 1.034200733712  | 3.333780009732  |
| H | -0.778637478670 | 1.908725342289  | 3.766452458300  |
| H | -2.245945843913 | 1.281864638837  | 2.935668557880  |
| H | -1.352991396013 | 0.233155591438  | 4.070235348554  |
| C | -0.395895585024 | -1.604170097837 | -0.767631482061 |
| C | -0.198578619525 | -0.566434845913 | -1.789590381253 |
| C | -1.189044816929 | 0.444745113616  | -1.993837827795 |
| H | 0.554612799232  | -0.689255597504 | -2.559436288344 |
| H | 0.128933848927  | -2.529158741668 | -0.986955069816 |
| H | -1.429916572728 | -1.821693899438 | -0.496888424869 |
| O | -0.939062443972 | 1.410154677416  | -2.972970533809 |
| C | -1.994088287766 | 2.300217979847  | -2.949952629151 |
| C | -2.899413845584 | 1.936148294392  | -1.981420734170 |
| C | -2.387286077528 | 0.747019790095  | -1.362709488910 |
| H | -1.957514614994 | 3.101161709977  | -3.667625321545 |
| H | -2.845578261181 | 0.177926175162  | -0.568288327018 |
| H | -3.818842477803 | 2.445712635450  | -1.745168532226 |

29

TS78 -802.958764

|   |                 |                 |                 |
|---|-----------------|-----------------|-----------------|
| C | 1.658698781797  | 2.080559590049  | -0.804193115769 |
| C | 1.515748333371  | 0.823740529248  | -1.507416355870 |
| C | 0.334257272203  | 0.105126764635  | -1.056323318663 |
| C | -0.309601776748 | 1.062308378544  | -0.044818019224 |
| C | 0.463233663576  | 2.164050950087  | 0.097882855758  |
| H | -1.268032724057 | 0.862304903097  | 0.414430500222  |
| O | 2.571758124015  | 2.943898195137  | -0.903989234527 |
| C | -0.517386678670 | -0.366226779729 | -2.218828342183 |
| H | 2.197656819155  | 0.460927410798  | -2.264724429704 |
| H | 0.286298190373  | 3.001848495103  | 0.759533229643  |
| O | -1.692409210616 | 0.322772014954  | -2.303441329958 |
| O | -0.193844091022 | -1.260924035600 | -3.008698012771 |
| C | -2.540191174225 | 0.049482902980  | -3.466984737608 |
| H | -3.411055657502 | 0.688114046169  | -3.335980881932 |
| H | -2.003362180646 | 0.301711648716  | -4.384103607134 |

|   |                 |                 |                 |
|---|-----------------|-----------------|-----------------|
| H | -2.821722098066 | -1.005903003443 | -3.489170306735 |
| C | 0.680524752725  | -1.301510696914 | -0.194213123611 |
| C | 0.867431475007  | -0.832825655749 | 1.165065863622  |
| C | 0.025359110083  | -1.187830761874 | 2.242699911782  |
| H | 1.713678771816  | -0.189087434275 | 1.387175258925  |
| H | 1.554789415838  | -1.721078222576 | -0.685828389770 |
| H | -0.166469218769 | -1.983205531895 | -0.302954823724 |
| O | 0.240256780405  | -0.540972090868 | 3.468395163148  |
| C | -0.703260871625 | -1.007706508856 | 4.351658356329  |
| C | -1.518462488554 | -1.934000962320 | 3.736123351027  |
| C | -1.054455808676 | -2.058736327021 | 2.390742576489  |
| H | -0.663889446239 | -0.606303395702 | 5.349506314994  |
| H | -1.445507418495 | -2.716596471756 | 1.631230903127  |
| H | -2.337878778317 | -2.463299678752 | 4.193224191585  |

29

TS79 -802.958683

|   |                 |                 |                 |
|---|-----------------|-----------------|-----------------|
| C | 1.444028935258  | 1.312190007574  | -1.765703394601 |
| C | 0.166887456886  | 0.713184683751  | -2.071195165923 |
| C | -0.266406554575 | -0.214067966659 | -1.017300789179 |
| C | 0.882097910108  | -0.143043626636 | -0.001035407561 |
| C | 1.837360554910  | 0.718444724446  | -0.451959034283 |
| H | 0.952397419192  | -0.812190184562 | 0.846190104814  |
| O | 2.107058195645  | 2.158848025659  | -2.428343176941 |
| C | -0.583573272243 | -1.582364131150 | -1.594465363180 |
| H | -0.418786216638 | 0.934338159093  | -2.954298426874 |
| H | 2.760404205501  | 0.977057028353  | 0.051545192051  |
| O | 0.452381655143  | -2.455867651419 | -1.444631475272 |
| O | -1.647391844081 | -1.874927441555 | -2.153388866299 |
| C | 0.319521104457  | -3.763665781089 | -2.091516682372 |
| H | 1.254441507437  | -4.277579361620 | -1.879041194380 |
| H | -0.533622036358 | -4.304314481018 | -1.675074261060 |
| H | 0.178585813536  | -3.633110551554 | -3.166700311457 |
| C | -1.565181161443 | 0.285789128423  | -0.182397664987 |
| C | -0.929301305296 | 1.120493977241  | 0.847509291330  |
| C | -1.059162519687 | 0.880812780589  | 2.236275874933  |
| H | -0.453613244663 | 2.047774719485  | 0.543083588613  |
| H | -2.238692467233 | 0.803876164150  | -0.861767056848 |
| H | -2.079414781046 | -0.582272895938 | 0.237494734715  |
| O | -0.341509761780 | 1.716285639035  | 3.103973876029  |
| C | -0.580784943553 | 1.281197700593  | 4.385285816245  |
| C | -1.427504291160 | 0.193461710276  | 4.371349159023  |
| C | -1.739948161779 | -0.064948646876 | 3.000888033527  |
| H | -0.101170140020 | 1.832369327502  | 5.175579229207  |
| H | -2.396423921689 | -0.831854798573 | 2.622135769519  |
| H | -1.786818282942 | -0.344050001229 | 5.233007979569  |

29

TS80 -802.958593

|   |                 |                 |                 |
|---|-----------------|-----------------|-----------------|
| C | -0.632007639768 | 1.761967629812  | -1.870571070497 |
| C | -0.504456604088 | 1.947420569374  | -0.446264794222 |
| C | -0.806903672905 | 0.693062549418  | 0.281355077902  |
| C | -1.109643591450 | -0.294953001298 | -0.847497832551 |
| C | -0.999916498682 | 0.316297353571  | -2.049051166110 |
| H | -1.399647271667 | -1.319976066346 | -0.654555662155 |
| O | -0.460216340596 | 2.597837236658  | -2.801686080842 |
| C | -1.922739323297 | 0.923038600315  | 1.290015382332  |
| H | -0.282467164139 | 2.888654816591  | 0.039303506566  |
| H | -1.141329651592 | -0.132733173675 | -3.023767709831 |
| O | -3.136508725693 | 0.506888915994  | 0.832124334263  |
| O | -1.757480216315 | 1.447945182850  | 2.398982640900  |
| C | -4.301298543969 | 0.804574900112  | 1.668689148788  |
| H | -5.149465599589 | 0.393792591750  | 1.125202482128  |
| H | -4.192440538355 | 0.332666866864  | 2.648082948247  |
| H | -4.402023493767 | 1.884936139327  | 1.794636274649  |
| C | 0.449984768011  | 0.149264777759  | 1.103024453779  |
| C | 1.403465463067  | -0.294638635953 | 0.077360574171  |
| C | 2.217044018701  | -1.428026232047 | 0.214887873361  |
| H | 1.508712505692  | 0.303357547513  | -0.824171642829 |
| H | 0.788833397039  | 0.989164551657  | 1.716158951291  |
| H | 0.165130077717  | -0.666325339341 | 1.778836043139  |
| O | 3.019204372063  | -1.800928404178 | -0.879426958236 |
| C | 3.688904652769  | -2.941119201351 | -0.526957278147 |
| C | 3.350202153053  | -3.326124809311 | 0.757024623834  |
| C | 2.419427292980  | -2.362643820425 | 1.238077055854  |
| H | 4.358795318082  | -3.350933445870 | -1.263350943345 |
| H | 1.960244318143  | -2.334181830509 | 2.213340866845  |
| H | 3.732092828508  | -4.184522453396 | 1.283899698369  |

29

TS81 -802.957623

|   |                 |                 |                 |
|---|-----------------|-----------------|-----------------|
| C | -2.409252206363 | 0.339843713854  | 2.115039369728  |
| C | -1.164711354381 | 0.944917420731  | 2.711295260775  |
| C | -0.266711867048 | 1.199649662231  | 1.733616927954  |
| C | -0.805127853495 | 0.755403042588  | 0.371418730445  |
| C | -2.153318353950 | 0.238073602631  | 0.702372860889  |
| H | -0.801039936513 | 1.578368204955  | -0.351032442737 |
| O | -3.438457073346 | 0.011011103343  | 2.770349968540  |
| C | 1.043504048913  | 1.830072491390  | 1.951956885899  |
| H | -1.038630218183 | 1.146952012148  | 3.767486205041  |
| H | -2.908756058982 | -0.064658281137 | -0.010080412354 |
| O | 1.714027425903  | 2.050656266653  | 0.763144555400  |
| O | 1.527254458300  | 2.151614920159  | 3.046246328843  |
| C | 3.012403011027  | 2.715502105561  | 0.863019494218  |
| H | 3.363457660516  | 2.813026287032  | -0.162916543239 |



|   |                 |                 |                 |
|---|-----------------|-----------------|-----------------|
| H | 2.897487755024  | 3.695731314180  | 1.331468535378  |
| H | 3.701236650337  | 2.113035502516  | 1.460316625199  |
| C | 0.146878841617  | -0.370665284912 | -0.229191422096 |
| C | -0.553119155409 | -1.202555683923 | -1.212490112440 |
| C | 0.092425679041  | -1.859419162608 | -2.265107422689 |
| H | -1.626554001205 | -1.336429447481 | -1.122996059056 |
| H | 0.401535799517  | -0.964586781848 | 0.662349350887  |
| H | 1.080815480125  | 0.052096046125  | -0.614947049129 |
| O | -0.701830943897 | -2.582223368769 | -3.177839300388 |
| C | 0.135282917339  | -3.102863127834 | -4.126876490942 |
| C | 1.446177820007  | -2.744962824819 | -3.868488874843 |
| C | 1.428226544144  | -1.961143450553 | -2.681731016791 |
| H | -0.324461215883 | -3.693786129749 | -4.900567031010 |
| H | 2.276330196767  | -1.529125896536 | -2.175054305976 |
| H | 2.306725449187  | -3.021564753830 | -4.454284771888 |

29

TS82 -802.954624

|   |                 |                 |                 |
|---|-----------------|-----------------|-----------------|
| C | -0.873125573151 | 1.616317566303  | -1.058321878632 |
| C | -1.263803887165 | 2.325277338887  | 0.119274751647  |
| C | -1.132419493729 | 1.461716843089  | 1.255287292864  |
| C | -0.671410593268 | 0.209504012586  | 0.900339922485  |
| C | -0.361461972206 | 0.240433201009  | -0.580527165410 |
| H | -0.542556498912 | -0.634096046943 | 1.564898152813  |
| O | -0.855380710110 | 1.958769082670  | -2.278329165938 |
| C | -1.496613861130 | 1.884314476392  | 2.628227350808  |
| H | -1.563861403440 | 3.362708354843  | 0.157838206385  |
| H | 0.730230445561  | 0.311544451571  | -0.706464606757 |
| O | -1.311377678959 | 0.882346032498  | 3.550355956538  |
| O | -1.920197330911 | 3.004017384091  | 2.941407163336  |
| C | -1.646243717304 | 1.198233945308  | 4.937238161440  |
| H | -1.423334127644 | 0.291220495181  | 5.496251519617  |
| H | -1.040657091595 | 2.036294944543  | 5.290912602687  |
| H | -2.703987737112 | 1.459791712492  | 5.021031201828  |
| C | -0.935643837472 | -0.921843226410 | -1.419813132989 |
| C | 0.051913982911  | -1.428552339246 | -2.410337690877 |
| C | 1.243341169614  | -2.025328835579 | -2.018500264335 |
| H | -0.148963934726 | -1.340370602664 | -3.473732892376 |
| H | -1.837270103043 | -0.585356687680 | -1.932269168098 |
| H | -1.227974680167 | -1.725143853149 | -0.722121531710 |
| O | 2.150708110502  | -2.456434236792 | -3.009493923332 |
| C | 3.227860489974  | -3.002920856887 | -2.366577233947 |
| C | 3.057791425336  | -2.952824373888 | -0.992814537872 |
| C | 1.803161445159  | -2.333931896435 | -0.758697303147 |
| H | 4.019645178546  | -3.378572885852 | -2.992345941451 |
| H | 1.343546574979  | -2.129589290543 | 0.195604508926  |
| H | 3.754154179973  | -3.315406417988 | -0.255287741967 |

29

TS83 -802.954395

|   |                 |                 |                 |
|---|-----------------|-----------------|-----------------|
| C | -1.292913319401 | -0.624704241261 | 1.265816647275  |
| C | -0.318970277594 | -1.611781979300 | 1.461929798155  |
| C | 0.879367582847  | -1.205746131641 | 0.771320065308  |
| C | 0.767667301823  | 0.017371033113  | 0.138803827821  |
| C | -0.591671070696 | 0.535848933503  | 0.450546063927  |
| H | 1.558918891050  | 0.541078132737  | -0.376594397043 |
| O | -2.543994476961 | -0.523009575638 | 1.519994825519  |
| C | 2.105777816431  | -2.040834255835 | 0.768044704813  |
| H | -0.460522211524 | -2.560445310867 | 1.955336883535  |
| H | -0.551296649407 | 1.438308788576  | 1.075558910228  |
| O | 3.139275424702  | -1.462622328916 | 0.066107144165  |
| O | 2.223534514218  | -3.143666882210 | 1.318353249890  |
| C | 4.391895734630  | -2.210320578181 | 0.013317857617  |
| H | 5.062210334087  | -1.598407535681 | -0.588009116207 |
| H | 4.791292772139  | -2.353864015688 | 1.020595782908  |
| H | 4.232454501540  | -3.187728585051 | -0.449375680754 |
| C | -2.063982331945 | 3.646565843356  | 0.531483742945  |
| C | -1.569700635444 | 3.466507373101  | -0.719874399778 |
| C | -1.461625366607 | 2.159771194620  | -1.305504440523 |
| H | -1.259803812189 | 4.305214246074  | -1.333668851768 |
| H | -2.148295406523 | 4.641837271276  | 0.953694460646  |
| H | -2.409925783377 | 2.819907704503  | 1.146859613630  |
| O | -1.138394007624 | 2.059550792105  | -2.603486027375 |
| C | -1.181150195868 | 0.663501010452  | -2.969568024714 |
| C | -1.503766235715 | -0.073421892887 | -1.896159980674 |
| C | -1.645006591188 | 0.836394296757  | -0.714227650206 |
| H | -0.947087139208 | 0.468949391924  | -4.000414061671 |
| H | -2.584630760533 | 0.700492567854  | -0.128884286668 |
| H | -1.587487033101 | -1.146600460086 | -1.837196534549 |

29

TS84 -802.954187

|   |                 |                 |                |
|---|-----------------|-----------------|----------------|
| C | 0.205016603210  | 3.451056973305  | 0.375712757060 |
| C | -0.372323115478 | 2.141119313034  | 0.309644892909 |
| C | 0.698360822354  | 1.127216229720  | 0.135183515687 |
| C | 1.984811293134  | 1.946506962610  | 0.107453919119 |
| C | 1.702518680443  | 3.255741961790  | 0.221788743548 |
| H | 2.959152117479  | 1.483861729890  | 0.008009316543 |
| O | -0.351896963536 | 4.576253445183  | 0.522753992943 |
| C | 0.510464138033  | 0.179182551979  | 1.298332174291 |
| H | -1.422384001542 | 1.919391054073  | 0.441062606805 |
| H | 2.400569005724  | 4.083349869482  | 0.224109969265 |
| O | 1.279494015118  | 0.376966916759  | 2.383260684906 |
| O | -0.351156446187 | -0.734853406485 | 1.214238927678 |
| C | 0.938207159754  | -0.365085880185 | 3.601928863271 |

|   |                 |                 |                 |
|---|-----------------|-----------------|-----------------|
| H | 1.652132854275  | -0.019921097131 | 4.346141888259  |
| H | -0.085746296796 | -0.129106503130 | 3.900463570357  |
| H | 1.035749544531  | -1.438976763382 | 3.427270135733  |
| C | 0.580820337124  | 0.190051727430  | -1.151826680574 |
| C | -0.630780112556 | -0.635102280101 | -1.027755048708 |
| C | -0.680193876640 | -2.007585309018 | -1.349004549332 |
| H | -1.578259127687 | -0.129697363502 | -0.866805413061 |
| H | 0.505892645671  | 0.889974666713  | -1.987779427499 |
| H | 1.484382121373  | -0.418275197875 | -1.270938386423 |
| O | -1.923219597277 | -2.649356220706 | -1.253568628289 |
| C | -1.726746546184 | -3.968311155970 | -1.561719570988 |
| C | -0.398078653562 | -4.203175031200 | -1.856140202930 |
| C | 0.273440946628  | -2.952398720966 | -1.724752596992 |
| H | -2.596831727365 | -4.601659118795 | -1.537086132558 |
| H | 1.321732203038  | -2.761622887897 | -1.889270574641 |
| H | 0.035112440175  | -5.149381277300 | -2.133934752376 |

29

TS85 -802.953524

|   |                 |                 |                 |
|---|-----------------|-----------------|-----------------|
| C | 1.052484026190  | 1.407171607150  | 0.397703859169  |
| C | 1.660048078819  | 0.343293339484  | 1.141163092852  |
| C | 1.332232124239  | -0.864779465266 | 0.496978133957  |
| C | 0.483580968715  | -0.686849626114 | -0.612666785253 |
| C | 0.115102460752  | 0.709754815992  | -0.674943541658 |
| H | 0.129585354976  | -1.475057178061 | -1.258798552670 |
| O | 1.165570633143  | 2.656770131247  | 0.508944799564  |
| C | 1.870505962911  | -2.174551726686 | 0.946482771009  |
| H | 2.301427329342  | 0.459103474483  | 2.000344988777  |
| H | 0.064226012267  | 1.209307610221  | -1.641859487331 |
| O | 1.362732856656  | -3.222506231140 | 0.218969614852  |
| O | 2.675875373573  | -2.337539947500 | 1.871374356838  |
| C | 1.845796368771  | -4.557894583333 | 0.565135476542  |
| H | 1.309013226076  | -5.233962865770 | -0.097632051110 |
| H | 2.924191349471  | -4.622847937331 | 0.400924898306  |
| H | 1.629173020976  | -4.779056106431 | 1.613223773223  |
| C | -1.110268247175 | 3.898602729337  | -1.230881704413 |
| C | -2.180227513530 | 3.085643205763  | -1.437267235720 |
| C | -2.329722958505 | 1.789996098095  | -0.844589675338 |
| H | -2.988771516126 | 3.383722319211  | -2.098080012593 |
| H | -1.062803749959 | 4.859037188240  | -1.734548451542 |
| H | -0.278629677576 | 3.629162516464  | -0.577138427538 |
| O | -3.439215977056 | 1.080468025343  | -1.225787871910 |
| C | -3.409253755344 | -0.167026743985 | -0.548626415652 |
| C | -2.305240786695 | -0.256454487660 | 0.212280092408  |
| C | -1.496402224352 | 0.985663133197  | 0.030989770349  |
| H | -4.242609445980 | -0.816303069584 | -0.750498885151 |
| H | -1.162540042026 | 1.458590776904  | 0.958752429910  |

H -1.999618229485 -1.097257117267 0.812987015144  
29

TS86 -802.953520

|   |                 |                 |                 |
|---|-----------------|-----------------|-----------------|
| C | 0.635949085389  | -0.972819749637 | -1.369542144401 |
| C | 0.200989391734  | 0.221291636518  | -2.007726198815 |
| C | -0.887825767866 | 0.742969653678  | -1.254251011042 |
| C | -1.127217230717 | 0.024180316554  | -0.088617621713 |
| C | -0.073644936943 | -0.999431013672 | 0.044535099983  |
| H | -1.902641876641 | 0.237134909970  | 0.631622241497  |
| O | 1.418844429556  | -1.884642860426 | -1.769236648632 |
| C | -1.682898856660 | 1.912681246429  | -1.702575677391 |
| H | 0.549554162002  | 0.592390539109  | -2.958780347129 |
| H | -0.372417896801 | -1.992626597933 | 0.379388191479  |
| O | -2.660930429884 | 2.257004996664  | -0.799218480579 |
| O | -1.508873511765 | 2.535010402874  | -2.757593117533 |
| C | -3.524248234424 | 3.378157865671  | -1.163097108573 |
| H | -4.245687621165 | 3.456298764770  | -0.351744080789 |
| H | -2.936507120554 | 4.295030020006  | -1.255192548234 |
| H | -4.024557579308 | 3.177563756858  | -2.113638927832 |
| C | 2.887831195538  | -3.110669216241 | 0.476345652152  |
| C | 2.493401052032  | -2.654449992853 | 1.696076666116  |
| C | 1.769005680078  | -1.445398171425 | 1.935186690773  |
| H | 2.741639394302  | -3.206757469997 | 2.598066686148  |
| H | 3.416585066708  | -4.056917285250 | 0.410211315556  |
| H | 2.650476226018  | -2.595594168308 | -0.454249089498 |
| O | 1.594911030374  | -1.148601972649 | 3.257994393369  |
| C | 0.888925872120  | 0.081034951805  | 3.355054666172  |
| C | 0.586045318439  | 0.535785255495  | 2.131431019280  |
| C | 1.098710285572  | -0.431556092287 | 1.098431178687  |
| H | 0.712878386138  | 0.427408652536  | 4.357844303416  |
| H | 1.771194198493  | 0.057437786249  | 0.370918162506  |
| H | 0.032677570374  | 1.428610143344  | 1.891490757652  |

29

TS87 -802.953228

|   |                 |                 |                 |
|---|-----------------|-----------------|-----------------|
| C | 1.848300124842  | 1.777733763643  | -1.649045403926 |
| C | 0.823345163776  | 1.410623565995  | -0.702811048201 |
| C | 0.238727407454  | 0.085038955232  | -1.075271358884 |
| C | 0.989860161586  | -0.282039721640 | -2.354924998885 |
| C | 1.917226784021  | 0.648229471123  | -2.647190301339 |
| H | 0.780107775132  | -1.194968698521 | -2.898674312600 |
| O | 2.568068442435  | 2.813676473801  | -1.675924083636 |
| C | -1.271887490478 | 0.222224912896  | -1.200460424672 |
| H | 0.404877138695  | 2.097039347429  | 0.020498614357  |
| H | 2.619987285256  | 0.640759374702  | -3.470289339491 |
| O | -1.710787414172 | 0.322150184631  | -2.482227363382 |
| O | -2.028796884409 | 0.264769051032  | -0.216446106713 |

|   |                 |                 |                 |
|---|-----------------|-----------------|-----------------|
| C | -3.133570614624 | 0.609371792896  | -2.680046584502 |
| H | -3.257148222449 | 0.685728434501  | -3.758097787355 |
| H | -3.741887193385 | -0.199296132302 | -2.268176231895 |
| H | -3.394553113214 | 1.548777957155  | -2.187376878531 |
| C | 0.524982448472  | -1.000081511846 | 0.026282972346  |
| C | 0.218604686110  | -0.456334384894 | 1.362053066043  |
| C | 0.039491558202  | -1.269138790476 | 2.486514081734  |
| H | 0.128631460729  | 0.613447868902  | 1.495940664408  |
| H | 1.601047110396  | -1.189685846690 | -0.087409077891 |
| H | 0.008735854231  | -1.955171238908 | -0.150681339860 |
| O | -0.299040229603 | -0.651910570632 | 3.705293127154  |
| C | -0.452270462085 | -1.641127137181 | 4.635595005157  |
| C | -0.226228995532 | -2.883011606593 | 4.069056314940  |
| C | 0.095332779104  | -2.652254727759 | 2.703365084005  |
| H | -0.710404074446 | -1.327149995027 | 5.632591990750  |
| H | 0.348447062018  | -3.392812547041 | 1.961521979487  |
| H | -0.279273039976 | -3.831732185574 | 4.576273794709  |

29

TS88 -802.951944

|   |                 |                 |                 |
|---|-----------------|-----------------|-----------------|
| C | 1.253850638250  | 1.729542133568  | 0.105499733693  |
| C | 0.817149779561  | 1.667850688518  | -1.236933262513 |
| C | -0.329185543636 | 0.797016749699  | -1.322900012649 |
| C | -0.693140890879 | 0.271712053099  | -0.103972175605 |
| C | 0.258111517011  | 0.871363711061  | 0.923567251579  |
| H | -1.563647812655 | -0.334646465606 | 0.102060575435  |
| O | 2.259055449935  | 2.263691917276  | 0.683538138892  |
| C | -1.024614360484 | 0.528302949013  | -2.604046433257 |
| H | 1.239765271979  | 2.214183443748  | -2.067138301425 |
| H | -0.268427790020 | 1.524769690619  | 1.627306552919  |
| O | -2.085527845592 | -0.335595577287 | -2.458010980583 |
| O | -0.712047456086 | 1.006690616988  | -3.702306110745 |
| C | -2.839891155861 | -0.653860432825 | -3.667198003402 |
| H | -3.612776101336 | -1.349549875316 | -3.345037687263 |
| H | -3.280365329284 | 0.253238511759  | -4.088716275908 |
| H | -2.185605905948 | -1.112491394148 | -4.413024093507 |
| C | -0.957142348138 | 0.216862342226  | 4.060189407531  |
| C | -0.718911463945 | -0.973641002025 | 3.451261507566  |
| C | 0.256895716128  | -1.146446364055 | 2.416691647148  |
| H | -1.260023491681 | -1.867090568349 | 3.745355060984  |
| H | -1.698804019090 | 0.293593963811  | 4.847317914057  |
| H | -0.417592369441 | 1.122891399871  | 3.802966719770  |
| O | 0.491195327957  | -2.401558952558 | 1.996194409463  |
| C | 1.489230131002  | -2.360229369029 | 0.964256732859  |
| C | 1.868911072006  | -1.094389966895 | 0.746598304297  |
| C | 1.115169109389  | -0.176168775868 | 1.682819986731  |
| H | 1.733766950291  | -3.318259520169 | 0.542596414479  |

|   |                |                 |                |
|---|----------------|-----------------|----------------|
| H | 1.812665783367 | 0.406261171222  | 2.314637491763 |
| H | 2.582526512873 | -0.739450597449 | 0.020485999294 |

29

TS89 -802.951425

|   |                 |                 |                 |
|---|-----------------|-----------------|-----------------|
| C | -1.037869291485 | -2.523610127269 | 0.033336082968  |
| C | -0.145881465529 | -1.244955181187 | 0.036692869558  |
| C | -0.709880065218 | -0.404832699617 | -0.984624519275 |
| C | -1.838483648582 | -1.085142426872 | -1.546989182229 |
| C | -2.002961494962 | -2.365162592470 | -1.022105234802 |
| H | -2.446600429655 | -0.649895373909 | -2.330495001603 |
| O | -0.942387920404 | -3.405419971190 | 0.928028730069  |
| C | -0.067539782989 | 0.763871777121  | -1.535183855532 |
| H | 0.933022460723  | -1.402179800250 | 0.017262921360  |
| H | -2.783179052903 | -3.074623033032 | -1.249368657981 |
| O | -0.813165166919 | 1.345784841839  | -2.549046940777 |
| O | 1.037689434591  | 1.229157240110  | -1.188701283397 |
| C | -0.240090924464 | 2.529930939601  | -3.175905061635 |
| H | -0.970754124249 | 2.838921565794  | -3.922114900795 |
| H | -0.085133130608 | 3.316539149295  | -2.432581197606 |
| H | 0.718206584935  | 2.290529299643  | -3.644268279672 |
| C | -0.013749842320 | -1.790339970174 | 2.522803268510  |
| C | -0.352012350990 | -0.651966508772 | 1.742169488974  |
| C | 0.538997888582  | 0.537259574858  | 1.821662313651  |
| H | -1.406375451679 | -0.376455014897 | 1.767269854660  |
| H | -0.762311119662 | -2.426651365583 | 2.970221472891  |
| H | 1.026172646151  | -2.031357222664 | 2.729456778082  |
| O | -0.076876091371 | 1.747881083987  | 1.554249572861  |
| C | 0.897797887439  | 2.730453600374  | 1.648074949227  |
| C | 2.097423893540  | 2.162018049107  | 1.977211380936  |
| C | 1.866265126600  | 0.742046589497  | 2.092917120727  |
| H | 0.576190473365  | 3.737290462938  | 1.451286459285  |
| H | 2.602293985383  | -0.009507582720 | 2.331221147062  |
| H | 3.034873117648  | 2.676275699396  | 2.109702547758  |

29

TS90 -802.950922

|   |                 |                 |                 |
|---|-----------------|-----------------|-----------------|
| C | -0.185647733199 | 1.266823005689  | 1.224031853253  |
| C | -1.492430012011 | 1.148831396811  | 0.750822291899  |
| C | -1.697397067599 | -0.146415855178 | 0.141785647336  |
| C | -0.575784129376 | -0.933577653731 | 0.155693400590  |
| C | 0.512032079652  | -0.168057840900 | 0.849523796184  |
| H | -0.472984110665 | -1.926838416042 | -0.254259111311 |
| O | 0.477239950550  | 2.169924300934  | 1.835040220051  |
| C | -3.007436481837 | -0.550313748996 | -0.421950072053 |
| H | -2.265704446528 | 1.887840429872  | 0.896753939832  |
| H | 0.822206547865  | -0.602652259538 | 1.804858204708  |
| O | -2.979102442716 | -1.808194938384 | -0.977688219448 |

|   |                 |                 |                 |
|---|-----------------|-----------------|-----------------|
| O | -4.033293481462 | 0.142995557901  | -0.414157609510 |
| C | -4.231545917539 | -2.300001816638 | -1.544876696886 |
| H | -4.000366109850 | -3.292628723499 | -1.927356906467 |
| H | -5.003492131330 | -2.347664399157 | -0.772672647624 |
| H | -4.570071071158 | -1.639459439869 | -2.347265177877 |
| C | 2.263581247060  | 1.335460873760  | -2.148387589670 |
| C | 1.402048576481  | 0.634430223362  | -1.386774873292 |
| C | 1.667437363172  | 0.252018106152  | 0.018175492821  |
| H | 0.438516638612  | 0.313767387791  | -1.770853600186 |
| H | 2.005461758525  | 1.606885285197  | -3.166155345588 |
| H | 3.235233740349  | 1.662692105539  | -1.786052835617 |
| O | 2.718313697978  | -1.335901698358 | -0.171550582452 |
| C | 3.787705359704  | -1.043171866196 | 0.453619661477  |
| C | 3.871098774765  | 0.289251072272  | 1.018547697006  |
| C | 2.716772837660  | 0.968171759409  | 0.782672507298  |
| H | 4.569139306721  | -1.795193698649 | 0.558142997024  |
| H | 2.411983503134  | 1.940697588013  | 1.180175363339  |
| H | 4.716210353255  | 0.645093290683  | 1.587603079916  |

29

TS91 -802.948012

|   |                 |                 |                 |
|---|-----------------|-----------------|-----------------|
| C | -0.635530970531 | 0.738333645142  | -1.662697626719 |
| C | -1.597421306186 | 0.534559062908  | -0.669080472609 |
| C | -1.090996684322 | 0.650589598801  | 0.662456927917  |
| C | 0.267184041382  | 0.816246259373  | 0.744633487332  |
| C | 0.881470544836  | 0.987184465357  | -0.610412595110 |
| H | 0.809927544020  | 0.995947922080  | 1.664015476350  |
| O | -0.510900894060 | 0.896737897256  | -2.868863070117 |
| C | -1.990941173413 | 0.512743407380  | 1.830997165585  |
| H | -2.564048704497 | 0.114572600401  | -0.909080582136 |
| H | 0.976966296688  | 2.036183864867  | -0.922700295231 |
| O | -1.311400552079 | 0.563426646251  | 3.023781020493  |
| O | -3.216946921677 | 0.358669979115  | 1.770585088380  |
| C | -2.112966173270 | 0.455640458930  | 4.241578295581  |
| H | -1.398548221795 | 0.539850523083  | 5.058293932452  |
| H | -2.850898371911 | 1.260486366622  | 4.280053095266  |
| H | -2.630234747044 | -0.506527782290 | 4.269669525417  |
| C | 3.480919654319  | -0.159743335145 | -3.024418871844 |
| C | 2.625365881533  | 0.610401040077  | -2.316797229014 |
| C | 1.953243308620  | 0.181626595702  | -1.088414454616 |
| H | 2.359471726250  | 1.593335449778  | -2.695114004343 |
| H | 3.929058110413  | 0.204751158102  | -3.942547694852 |
| H | 3.730952239510  | -1.173958390637 | -2.725518283301 |
| O | -0.392854537979 | -1.880077376354 | -0.765210103325 |
| C | 0.222109801626  | -1.967040980319 | 0.324099992222  |
| C | 1.676525497480  | -1.764237803569 | 0.455573811306  |
| C | 2.436031855360  | -0.959328896738 | -0.346021912721 |

|   |                 |                 |                 |
|---|-----------------|-----------------|-----------------|
| H | -0.294492358639 | -2.314768434871 | 1.231466700642  |
| H | 3.512888588647  | -1.112344236767 | -0.361678887744 |
| H | 2.175851697412  | -2.422424154067 | 1.164933189780  |

29

TS92 -802.947025

|   |                 |                 |                 |
|---|-----------------|-----------------|-----------------|
| C | -0.700187308060 | 1.190992988610  | 1.154707587066  |
| C | -0.319883170698 | 0.005997551717  | 1.821101819273  |
| C | -0.336616134633 | -1.083678930157 | 0.894937426963  |
| C | -0.712573794404 | -0.701007751070 | -0.376040666377 |
| C | -1.029928973570 | 0.789213189336  | -0.330302928256 |
| H | -0.864648929449 | -1.346562278518 | -1.228976256770 |
| O | -0.757307428048 | 2.404687055309  | 1.576248039265  |
| C | 0.043795978064  | -2.463895118188 | 1.278433214356  |
| H | -0.074677355454 | -0.068505236367 | 2.869575523324  |
| H | -2.068127828514 | 1.049564993806  | -0.557631488396 |
| O | 0.033006255083  | -3.330739842664 | 0.208405720153  |
| O | 0.347639332598  | -2.833976523699 | 2.419737413531  |
| C | 0.352484257639  | -4.726700271370 | 0.495391266072  |
| H | 0.287876743973  | -5.236201537541 | -0.464517988940 |
| H | 1.357504260481  | -4.809166255293 | 0.917207338827  |
| H | -0.367108807508 | -5.140135707510 | 1.206539971800  |
| C | -0.243835116438 | 0.708610641193  | -3.792803418334 |
| C | -0.631547261733 | 1.498893735356  | -2.781254737501 |
| C | -0.071705270963 | 1.447773672951  | -1.395286458997 |
| H | -1.439660571005 | 2.214803477920  | -2.906847952244 |
| H | -0.730956785529 | 0.767752914996  | -4.759746810564 |
| H | 0.550887659681  | -0.024992387677 | -3.693782722503 |
| O | 0.153919232218  | 2.870534965709  | -0.915001696577 |
| C | 1.150959776808  | 2.807064432724  | -0.063942948132 |
| C | 1.896599172973  | 1.584891871143  | -0.164421684411 |
| C | 1.261273089476  | 0.807622828619  | -1.111967911587 |
| H | 1.350751060080  | 3.682523049126  | 0.535915977910  |
| H | 1.614419441780  | -0.106234963588 | -1.560047390273 |
| H | 2.805915990652  | 1.375353083123  | 0.371886564482  |

29

TS93 -802.946877

|   |                 |                 |                 |
|---|-----------------|-----------------|-----------------|
| C | 2.556336785972  | -0.168781475340 | -0.657030959896 |
| C | 1.223392193406  | 0.579405790611  | -0.443346612483 |
| C | 0.828479570790  | 0.209954276746  | 0.939827461704  |
| C | 1.677811914920  | -0.789590932373 | 1.396653534465  |
| C | 2.678724972664  | -1.086702068847 | 0.426385137225  |
| H | 1.576212837096  | -1.275460886691 | 2.358042741635  |
| O | 3.212060632315  | -0.068047217322 | -1.747061715785 |
| C | -0.293146713895 | 0.815371083209  | 1.630270753209  |
| H | 1.220386321255  | 1.646137477789  | -0.658778491429 |
| H | 3.453937062509  | -1.834605559687 | 0.512993125111  |



|   |                 |                 |                 |
|---|-----------------|-----------------|-----------------|
| O | -0.508028178680 | 0.278173622244  | 2.882464789556  |
| O | -1.006993318147 | 1.730098475820  | 1.171072069215  |
| C | -1.621652369891 | 0.831732339222  | 3.644977010442  |
| H | -1.620160180998 | 0.285729431598  | 4.587008444235  |
| H | -1.473541451789 | 1.901510274163  | 3.813261135406  |
| H | -2.561523216084 | 0.681939714000  | 3.106886129141  |
| C | 0.828378199532  | 0.144833350171  | -2.889510108495 |
| C | 0.378504196069  | -0.211022793810 | -1.548911952551 |
| C | -1.107214016985 | -0.224286187311 | -1.415541250595 |
| H | 0.730038780773  | -1.257705778920 | -1.340302029987 |
| H | 1.690843431883  | 0.782597757412  | -3.042856645970 |
| H | 0.241490642725  | -0.170901548236 | -3.749939857823 |
| O | -1.664929075384 | -1.282652676228 | -0.707414779734 |
| C | -3.032811214244 | -1.059399668282 | -0.652402107078 |
| C | -3.341401114908 | 0.102389411248  | -1.308341190837 |
| C | -2.097313790525 | 0.642679026977  | -1.800239560282 |
| H | -3.612685564027 | -1.797838616178 | -0.127396140429 |
| H | -1.956588745252 | 1.576314220735  | -2.320105964610 |
| H | -4.322249684761 | 0.534409084900  | -1.417959492348 |

29

TS94 -802.940798

|   |                 |                 |                 |
|---|-----------------|-----------------|-----------------|
| C | -0.188828294626 | 1.052562766380  | -1.739531987303 |
| C | -1.058078897759 | 1.465091832185  | -0.681885329802 |
| C | -0.346153203180 | 1.260896890555  | 0.513881811579  |
| C | 1.014959882604  | 0.913945495629  | 0.308816086875  |
| C | 1.216454607560  | 0.788531150319  | -1.097152889219 |
| H | 1.764795515371  | 0.875319547566  | 1.082567618254  |
| O | -0.458284522197 | 0.734207322261  | -2.932139470356 |
| C | -0.977321205999 | 1.447714284971  | 1.847600777289  |
| H | -2.114565409766 | 1.661415785891  | -0.772317328944 |
| H | 2.062067225107  | 1.298127900310  | -1.560834470113 |
| O | -0.077987210548 | 1.306637450099  | 2.870039086213  |
| O | -2.174038411405 | 1.699254425996  | 2.037297318425  |
| C | -0.593081886444 | 1.469016656664  | 4.228492060684  |
| H | 0.271208019429  | 1.338823888241  | 4.876698490938  |
| H | -1.030190531190 | 2.463115874788  | 4.350476647050  |
| H | -1.355279184602 | 0.713333913710  | 4.433764352462  |
| C | 1.412998456892  | -0.793540982423 | -3.119584420018 |
| C | 1.575537835239  | -0.937982567081 | -1.724152462019 |
| C | 0.705836556307  | -1.875660804054 | -0.987862500847 |
| H | 2.601646465861  | -0.933803526159 | -1.353410800934 |
| H | 2.124845531555  | -0.212737294082 | -3.697902105473 |
| H | 0.615799840713  | -1.279419073346 | -3.664897523503 |
| O | 1.278699692086  | -2.499362767996 | 0.113695289072  |
| C | 0.290341278488  | -3.274244192519 | 0.704023437808  |
| C | -0.878950883459 | -3.146433694102 | 0.002818294270  |

|   |                 |                 |                 |
|---|-----------------|-----------------|-----------------|
| C | -0.612841472842 | -2.239287601206 | -1.089466997277 |
| H | 0.581064160054  | -3.829564048134 | 1.578113783681  |
| H | -1.314470499013 | -1.885276610726 | -1.827883674366 |
| H | -1.817086924920 | -3.625653956261 | 0.229886902314  |

29

TS95 -802.939983

|   |                 |                 |                 |
|---|-----------------|-----------------|-----------------|
| C | -0.571261682777 | 1.145757395235  | -0.777797049792 |
| C | -1.230378002043 | 0.782832971890  | 0.498014165984  |
| C | -1.638783389757 | -0.549064143190 | 0.371849806998  |
| C | -1.047242553812 | -1.165153562405 | -0.756217995621 |
| C | -0.108458419954 | -0.229579113528 | -1.337213404730 |
| H | -1.234157409160 | -2.180121506108 | -1.071595324553 |
| O | -0.395485230513 | 2.247528328273  | -1.304015743013 |
| C | -2.532769545111 | -1.219835836593 | 1.346059827326  |
| H | -1.525131556148 | 1.478206012240  | 1.269371353741  |
| H | 0.192041469752  | -0.290008778105 | -2.378133856084 |
| O | -2.811937620504 | -2.509980785587 | 0.980407460791  |
| O | -2.986686757794 | -0.697174866146 | 2.370833669953  |
| C | -3.699669653177 | -3.268913567119 | 1.861587251889  |
| H | -3.822196300377 | -4.234954564627 | 1.376159475956  |
| H | -3.243018416698 | -3.379800171784 | 2.847985784158  |
| H | -4.658510736725 | -2.755305559514 | 1.963292041296  |
| C | 1.755662723825  | -1.679360195789 | -0.278869920991 |
| C | 1.335210648159  | -0.336090481967 | -0.347793017751 |
| C | 2.396589904991  | 0.654550762953  | -0.648708872854 |
| H | 0.719750513499  | 0.078147874160  | 0.539450318795  |
| H | 1.046079875699  | -2.493653036602 | -0.376274944658 |
| H | 2.799974011891  | -1.923957791133 | -0.106425229298 |
| O | 2.397272509536  | 1.834350945520  | 0.085863528865  |
| C | 3.439799311541  | 2.611654926436  | -0.384873146620 |
| C | 4.095704630960  | 1.952424155665  | -1.391946868045 |
| C | 3.420069843391  | 0.689058462105  | -1.564576516137 |
| H | 3.566349023872  | 3.571310613568  | 0.084096231065  |
| H | 3.648868296935  | -0.078560808134 | -2.286632746177 |
| H | 4.942721901304  | 2.317818994095  | -1.948867559907 |

29

TS96 -802.939390

|   |                 |                 |                 |
|---|-----------------|-----------------|-----------------|
| C | -0.962191740169 | -1.897216969584 | -1.950146262435 |
| C | 0.370463633846  | -2.044813176716 | -1.264304374477 |
| C | 0.832092395933  | -0.838877211097 | -0.853201378607 |
| C | -0.155581875822 | 0.260554668417  | -1.246112535923 |
| C | -1.227568360997 | -0.490309485311 | -1.960985527405 |
| H | 0.307845585245  | 1.113730436981  | -1.745084336768 |
| O | -1.638877517197 | -2.863446712520 | -2.409315022495 |
| C | 2.118456686944  | -0.649740851676 | -0.168702711999 |
| H | 0.870027067640  | -2.995824230968 | -1.123986539865 |

|   |                 |                 |                 |
|---|-----------------|-----------------|-----------------|
| H | -2.065973474074 | -0.027453101200 | -2.459429363849 |
| O | 2.389463013970  | 0.679352395493  | 0.066904987283  |
| O | 2.899310445331  | -1.551440261130 | 0.170068343384  |
| C | 3.681539359334  | 0.992972868014  | 0.672252487261  |
| H | 3.679594967672  | 2.074373293626  | 0.798073227548  |
| H | 3.789479214091  | 0.481264225736  | 1.632206756165  |
| H | 4.491439498151  | 0.679241799648  | 0.009504024968  |
| C | -3.318171712938 | 1.670696191984  | 0.256916326928  |
| C | -2.129263568277 | 1.667432826521  | -0.367190807541 |
| C | -1.002171160264 | 0.742097027131  | -0.040826063883 |
| H | -1.916820631606 | 2.375993189255  | -1.163266281648 |
| H | -4.089703294563 | 2.379386662380  | -0.023344100021 |
| H | -3.564101148659 | 0.958177322944  | 1.039285748064  |
| O | -0.064666853460 | 1.988832372745  | 0.913449571940  |
| C | 0.079189734748  | 1.462286382472  | 2.075752074057  |
| C | -0.558514721100 | 0.193106972288  | 2.265935138145  |
| C | -1.084518894884 | -0.236501626879 | 1.073556608240  |
| H | 0.707137278470  | 1.959755191701  | 2.811201207099  |
| H | -1.483589718543 | -1.226835695193 | 0.904905185327  |
| H | -0.507056806753 | -0.383125216692 | 3.176561539752  |

29

TS97 -802.937410

|   |                 |                 |                 |
|---|-----------------|-----------------|-----------------|
| C | 0.716665205002  | 1.222208415187  | 1.293183049867  |
| C | 0.501232961367  | 2.053843774978  | 0.176399496426  |
| C | -0.514884358630 | 1.479084888184  | -0.669430017601 |
| C | -0.995718803987 | 0.285154880809  | -0.195837505520 |
| C | -0.268544486062 | 0.008167227554  | 1.115285734103  |
| H | -1.830446618468 | -0.269360410340 | -0.598591893227 |
| O | 1.514671742729  | 1.280809097863  | 2.281875186774  |
| C | -0.995454990982 | 2.148103516819  | -1.901851699177 |
| H | 0.960943121653  | 3.018336565771  | 0.021329269905  |
| H | -0.955598114643 | -0.031945483566 | 1.970753367857  |
| O | -1.973265175336 | 1.425042214293  | -2.549639877877 |
| O | -0.587772127185 | 3.233119296845  | -2.335483723697 |
| C | -2.517685508314 | 2.013266749343  | -3.769688053165 |
| H | -3.260447578843 | 1.299654822572  | -4.122736489645 |
| H | -2.977654368836 | 2.980734241323  | -3.552835632764 |
| H | -1.726210964843 | 2.153369623581  | -4.510478020242 |
| C | 2.142046138726  | -1.785561511361 | -0.839133199923 |
| C | 1.876873367787  | -1.184133911594 | 0.329364589690  |
| C | 0.565346474108  | -1.311789197249 | 1.058764086665  |
| H | 2.578964150754  | -0.509799934223 | 0.808927876824  |
| H | 3.085763505965  | -1.609905847515 | -1.343339239329 |
| H | 1.436244033224  | -2.439064327510 | -1.344334992807 |
| O | 0.889982721013  | -1.673830235935 | 2.509956683342  |
| C | 0.146199729868  | -2.705451066339 | 2.848799763687  |

|   |                 |                 |                 |
|---|-----------------|-----------------|-----------------|
| C | -0.665155511171 | -3.185167134481 | 1.790245605729  |
| C | -0.368012582684 | -2.413898635853 | 0.684750089263  |
| H | 0.245882305061  | -3.072610498895 | 3.860927236802  |
| H | -0.761407947793 | -2.523520797817 | -0.314620161724 |
| H | -1.346625708074 | -4.017210067847 | 1.854408532419  |

29

TS98 -802.937384

|   |                 |                 |                 |
|---|-----------------|-----------------|-----------------|
| C | -2.819198102037 | 0.145922300074  | 1.032822815165  |
| C | -2.135438072000 | 0.359250320277  | -0.228192191315 |
| C | -0.723471530478 | 0.193508709028  | -0.030831451970 |
| C | -0.531987451414 | -0.056673013479 | 1.460000126996  |
| C | -1.731189421819 | -0.120783322705 | 2.060641264460  |
| H | 0.446096009720  | -0.183903848277 | 1.903882837618  |
| O | -4.047908934517 | 0.175549847809  | 1.284341198950  |
| C | 0.003743136583  | 1.308679918308  | -0.711168883438 |
| H | -2.622723474745 | 0.619975090955  | -1.156486344154 |
| H | -1.943249127340 | -0.319134638361 | 3.102469503279  |
| O | 0.396042586668  | 2.336853851631  | 0.046650025019  |
| O | 0.204272798729  | 1.250829206110  | -1.959443914408 |
| C | 0.928432899873  | 3.528477253484  | -0.628069272376 |
| H | 1.155636610090  | 4.223758972385  | 0.175995967537  |
| H | 1.826622419480  | 3.266142560444  | -1.191231475650 |
| H | 0.171570229935  | 3.936708877352  | -1.300965957787 |
| C | -0.001079989236 | -0.756434331742 | -2.285724863557 |
| C | 0.053224380146  | -1.212419671379 | -0.929341295707 |
| C | 1.402149278917  | -1.472086299425 | -0.385727502701 |
| H | -0.683013183124 | -1.956720816863 | -0.636867112871 |
| H | -0.961896337066 | -0.690173265181 | -2.784330985325 |
| H | 0.879112974664  | -0.732882205072 | -2.918647505445 |
| O | 1.518247274933  | -2.477434328902 | 0.564234204108  |
| C | 2.843187282976  | -2.502393944595 | 0.982032855315  |
| C | 3.553514562880  | -1.535641950765 | 0.322515870530  |
| C | 2.624133883552  | -0.865500951744 | -0.558437115089 |
| H | 3.094313199940  | -3.244451773740 | 1.718974326537  |
| H | 2.839804531171  | -0.045790916679 | -1.226188956838 |
| H | 4.602876279479  | -1.321527291844 | 0.443000198592  |

29

TS99 -802.936688

|   |                 |                |                 |
|---|-----------------|----------------|-----------------|
| C | 1.398931246682  | 2.952350020287 | 0.456038555759  |
| C | 0.141998090821  | 2.442825256734 | 1.102526252513  |
| C | -0.260389065658 | 1.312152279945 | 0.478313037729  |
| C | 0.710342363284  | 0.936173363865 | -0.641824726535 |
| C | 1.704812706131  | 1.996591985223 | -0.597157999781 |
| H | 0.228010142869  | 0.722960987543 | -1.597669301508 |
| O | 2.025458707115  | 3.991387841137 | 0.784164138944  |
| C | -1.518304971122 | 0.584919615080 | 0.749274825523  |

|   |                 |                 |                 |
|---|-----------------|-----------------|-----------------|
| H | -0.353039319923 | 2.934787863649  | 1.929383843347  |
| H | 2.538676284792  | 2.100921862362  | -1.278982403692 |
| O | -1.971234449261 | -0.038573728442 | -0.383651836743 |
| O | -2.121504411411 | 0.548493200475  | 1.829811747179  |
| C | -3.198318728840 | -0.823009124890 | -0.268335504067 |
| H | -3.356833849292 | -1.246186217237 | -1.258011170937 |
| H | -3.066600477006 | -1.613066384540 | 0.475288217650  |
| H | -4.030033779023 | -0.178635038257 | 0.026378755095  |
| C | 1.949897563657  | -0.306790960369 | 1.096296278427  |
| C | 1.470938415357  | -0.500600094223 | -0.261761954044 |
| C | 0.651730185255  | -1.734069377309 | -0.427672701884 |
| H | 2.245020442599  | -0.497948152181 | -1.039051485715 |
| H | 2.137960909653  | 0.683897585741  | 1.490213174400  |
| H | 2.120137829209  | -1.156738168555 | 1.752666134835  |
| O | 0.549562746819  | -2.235168289411 | -1.719647690696 |
| C | -0.275246639105 | -3.348444585226 | -1.665409521558 |
| C | -0.684134768193 | -3.559112785241 | -0.374890327812 |
| C | -0.090711116569 | -2.512930686061 | 0.423936473048  |
| H | -0.452391773323 | -3.854601091900 | -2.598039366649 |
| H | -0.225796756429 | -2.349920546073 | 1.482086250788  |
| H | -1.325679027781 | -4.353463632870 | -0.029709846126 |

29

TS100 -802.936002

|   |                 |                 |                 |
|---|-----------------|-----------------|-----------------|
| C | -0.380587651853 | -0.050577430176 | 2.845494224262  |
| C | 0.690736768882  | 0.797557595887  | 2.189564592740  |
| C | 0.949245673758  | 0.341155534091  | 0.944181028975  |
| C | 0.064527622349  | -0.853216361131 | 0.634616965196  |
| C | -0.715354372417 | -1.059157097301 | 1.883919942598  |
| H | 0.628336263973  | -1.688214278024 | 0.214726632795  |
| O | -0.815724525261 | 0.141158484826  | 4.016601724784  |
| C | 1.987885991439  | 0.864725131963  | 0.045381172437  |
| H | 1.179313727429  | 1.629169120257  | 2.682596903435  |
| H | -1.401129027850 | -1.874230760773 | 2.066297080811  |
| O | 2.365199940099  | -0.064675052992 | -0.900399192799 |
| O | 2.516881645845  | 1.982540313067  | 0.119933988045  |
| C | 3.386147986292  | 0.358960177661  | -1.854076531598 |
| H | 3.570133272453  | -0.511393881898 | -2.482249301217 |
| H | 3.020864895191  | 1.202250173417  | -2.445951819174 |
| H | 4.295827258740  | 0.658202482857  | -1.328209193815 |
| C | -3.101468097904 | 1.035182587944  | -0.526796399558 |
| C | -1.892403994496 | 0.755285184654  | -0.006599456259 |
| C | -1.121587086495 | -0.476936429708 | -0.323787390195 |
| H | -1.399481383329 | 1.457372477187  | 0.656279231622  |
| H | -3.602167575634 | 1.965903490007  | -0.285137622906 |
| H | -3.628708249723 | 0.352496124509  | -1.189070389119 |
| O | -0.406627005120 | -0.065122304234 | -1.897881145141 |

|   |                 |                 |                 |
|---|-----------------|-----------------|-----------------|
| C | -0.660390162578 | -1.063476196759 | -2.666052727748 |
| C | -1.569135285868 | -2.030370433536 | -2.111843414339 |
| C | -1.813575044334 | -1.703113145303 | -0.807342215316 |
| H | -0.156844521591 | -1.140798546673 | -3.625710516602 |
| H | -2.389571900141 | -2.303339013848 | -0.116344061057 |
| H | -1.921091263894 | -2.908411338047 | -2.630726859768 |

29

TS101 -802.935765

|   |                 |                 |                 |
|---|-----------------|-----------------|-----------------|
| C | 2.212290752550  | -0.612261631176 | 0.468545649788  |
| C | 1.409766162364  | -0.563905011717 | 1.635923479404  |
| C | 0.435154124356  | 0.484300852231  | 1.476329289622  |
| C | 0.473634959754  | 1.013668693306  | 0.204373800424  |
| C | 1.476442597248  | 0.255587041672  | -0.584655399015 |
| H | -0.157582235984 | 1.806968518882  | -0.168038061741 |
| O | 3.180832493580  | -1.377856785627 | 0.140348102841  |
| C | -0.483027087298 | 0.896018407078  | 2.560983209887  |
| H | 1.552989326273  | -1.152024865151 | 2.530934462854  |
| H | 2.093421362711  | 0.837605422552  | -1.266773373392 |
| O | -1.292703573685 | 1.938230806782  | 2.190153735203  |
| O | -0.533925641479 | 0.374230159609  | 3.682504867820  |
| C | -2.240448937566 | 2.424347754213  | 3.191294961400  |
| H | -2.765121494091 | 3.246482834984  | 2.708412914186  |
| H | -2.933038542644 | 1.627428724013  | 3.472916641669  |
| H | -1.707058766642 | 2.768040217624  | 4.080877628142  |
| C | 1.813455633402  | -1.735972914863 | -2.090063834398 |
| C | 0.807005189132  | -0.988575417924 | -1.351221906402 |
| C | -0.444146078377 | -0.730612961994 | -2.124762118714 |
| H | 0.514495388501  | -1.595146265189 | -0.441541245060 |
| H | 2.867928761639  | -1.514688745415 | -1.985311211197 |
| H | 1.496923215900  | -2.486810421620 | -2.810674446860 |
| O | -1.644728593707 | -0.820323623105 | -1.430173013499 |
| C | -2.659700539009 | -0.502405082290 | -2.319643710079 |
| C | -2.127815252460 | -0.220395033250 | -3.549979650054 |
| C | -0.696093481468 | -0.367545739637 | -3.424285015661 |
| H | -3.660368863414 | -0.528103842228 | -1.925765343198 |
| H | 0.043440614258  | -0.210592649614 | -4.193368769001 |
| H | -2.675840528037 | 0.057688255148  | -4.435124443071 |

29

TS102 -802.935070

|   |                 |                 |                 |
|---|-----------------|-----------------|-----------------|
| C | 1.344691083555  | -1.761710195255 | 0.035709728105  |
| C | 2.279373652467  | -0.792729298194 | -0.442649943715 |
| C | 1.535732928410  | 0.358370022077  | -0.777213111084 |
| C | 0.139597711040  | 0.166329000920  | -0.684774342236 |
| C | -0.084688164637 | -1.168694656094 | -0.195413086428 |
| H | -0.608315744397 | 0.864155825250  | -1.025360737030 |
| O | 1.535463730683  | -2.836735791538 | 0.674283102467  |

|   |                 |                 |                 |
|---|-----------------|-----------------|-----------------|
| C | 2.187302187846  | 1.611995108018  | -1.240768252694 |
| H | 3.353946523796  | -0.865653358753 | -0.385073289704 |
| H | -0.754440059821 | -1.801275461271 | -0.781306185519 |
| O | 1.275779706240  | 2.566111846386  | -1.606878494676 |
| O | 3.409590569920  | 1.796331243482  | -1.298771504567 |
| C | 1.810930934761  | 3.838840241565  | -2.087814044894 |
| H | 0.936706776868  | 4.439488986234  | -2.330914314244 |
| H | 2.410070275799  | 4.313935709120  | -1.307268271798 |
| H | 2.433838832462  | 3.675903796238  | -2.970724290682 |
| C | -0.718763232630 | -2.655406856922 | 1.771686823183  |
| C | -0.871511468292 | -1.285827625983 | 1.405926568475  |
| C | -2.253002506857 | -0.789266803427 | 1.145835904484  |
| H | -0.291096449337 | -0.589615081256 | 2.010916027147  |
| H | 0.064749248327  | -2.983734922660 | 2.436914429299  |
| H | -1.397254756491 | -3.414786016354 | 1.391275867848  |
| O | -2.420570249696 | 0.585080399305  | 1.223809873624  |
| C | -3.748287212772 | 0.858488143904  | 0.921334398223  |
| C | -4.409112880307 | -0.309769792332 | 0.653295693123  |
| C | -3.444114826420 | -1.376086976384 | 0.799628502652  |
| H | -4.037018868389 | 1.894045645611  | 0.951320991063  |
| H | -3.629882810169 | -2.430518686138 | 0.671072773890  |
| H | -5.449466989133 | -0.411486542790 | 0.391434601728  |

29

TS103 -802.934432

|   |                 |                 |                 |
|---|-----------------|-----------------|-----------------|
| C | -0.473849939978 | 2.623273523930  | 0.653018611236  |
| C | -1.452540843157 | 2.143669150549  | -0.366587515671 |
| C | -1.386779174013 | 0.788685571233  | -0.483938390382 |
| C | -0.380799852602 | 0.204859466733  | 0.505221832900  |
| C | 0.181668631023  | 1.420370082753  | 1.135768102352  |
| H | -0.837959108802 | -0.499282944846 | 1.208642072909  |
| O | -0.266725694407 | 3.820533855244  | 0.986893039417  |
| C | -2.261496163137 | -0.013685450565 | -1.361144867255 |
| H | -2.104843966686 | 2.796827724032  | -0.932308827047 |
| H | 0.913811438584  | 1.413160558867  | 1.932315653430  |
| O | -2.097864719999 | -1.361725756052 | -1.140200093543 |
| O | -3.058515082480 | 0.435795764488  | -2.194066053507 |
| C | -2.927264628000 | -2.266751533541 | -1.937230317484 |
| H | -2.647789770575 | -3.267106149512 | -1.612819634487 |
| H | -3.984536088950 | -2.072152097419 | -1.743798650071 |
| H | -2.723692393165 | -2.124945444674 | -3.001247177162 |
| C | 1.071320794530  | 0.358642605102  | -1.397793998108 |
| C | 0.731113447411  | -0.566856331850 | -0.302061611270 |
| C | 1.890621855493  | -0.947366751789 | 0.576929709811  |
| H | 0.330537553847  | -1.503170263650 | -0.714356660980 |
| H | 1.538573893029  | -0.012557921768 | -2.307111502359 |
| H | 0.923980227462  | 1.428165968140  | -1.300490775161 |

|   |                |                 |                |
|---|----------------|-----------------|----------------|
| O | 1.840143523670 | -2.225704280824 | 1.123954876739 |
| C | 2.975869697386 | -2.381322365912 | 1.909654277709 |
| C | 3.731961216179 | -1.241703733040 | 1.860110457164 |
| C | 3.034040415759 | -0.315458699978 | 0.995962195078 |
| H | 3.080883987774 | -3.328027624090 | 2.409480634319 |
| H | 3.341374538979 | 0.682432196172  | 0.728550154107 |
| H | 4.668264824364 | -1.073534639435 | 2.366414107405 |

29

TS104 -802.934288

|   |                 |                 |                 |
|---|-----------------|-----------------|-----------------|
| C | -1.290800672849 | 0.896379744485  | -2.384359383428 |
| C | -0.114345832356 | 0.645717699177  | -1.611195053020 |
| C | -0.487075745829 | 0.258678953897  | -0.223721979665 |
| C | -2.010835231147 | 0.354870805095  | -0.213789159883 |
| C | -2.457415543879 | 0.712582077921  | -1.429847999617 |
| H | -2.609643238062 | 0.115304939421  | 0.657051147758  |
| O | -1.416144612495 | 1.220208335653  | -3.599910438094 |
| C | 0.069049602135  | -1.141390615449 | -0.173210778266 |
| H | 0.903608334103  | 0.725663007929  | -1.965161635863 |
| H | -3.486573850770 | 0.845412469466  | -1.739466861186 |
| O | -0.664823597718 | -2.143212391349 | -0.686127107213 |
| O | 1.197793408700  | -1.322976592173 | 0.385835565788  |
| C | 0.013756451663  | -3.413235098352 | -0.954463444746 |
| H | -0.768123155818 | -4.076665546551 | -1.316666285328 |
| H | 0.778742453596  | -3.260469500619 | -1.719720736875 |
| H | 0.470717381487  | -3.799324639703 | -0.040525957182 |
| C | -0.810475409338 | -0.973907427472 | 3.125470132940  |
| C | 0.505830449249  | -0.762032018243 | 2.916675027498  |
| C | 1.011438181710  | 0.128277322941  | 1.886032550198  |
| H | 1.261896915491  | -1.266957126349 | 3.507687031550  |
| H | -1.147281508724 | -1.658526210105 | 3.895297659933  |
| H | -1.580066596369 | -0.470978865301 | 2.548229999490  |
| O | 2.294798649879  | 0.538922816005  | 2.021563103274  |
| C | 2.496518950278  | 1.636804615967  | 1.123592925776  |
| C | 1.351435810655  | 1.971088803969  | 0.517000398987  |
| C | 0.248463922967  | 1.044217242263  | 0.970644762192  |
| H | 3.507288330204  | 2.001767962696  | 1.081758364708  |
| H | -0.542388064232 | 1.579653069120  | 1.507483279039  |
| H | 1.212034342668  | 2.736998317745  | -0.227925996766 |

29

TS105 -802.933644

|   |                 |                 |                |
|---|-----------------|-----------------|----------------|
| C | -1.691505570444 | -0.987265403490 | 0.456549559819 |
| C | -1.750044516831 | 0.076854198809  | 1.397198839305 |
| C | -0.430343969149 | 0.564819790236  | 1.646440156184 |
| C | 0.533309049340  | -0.113410101787 | 0.927286134208 |
| C | -0.171049234935 | -1.232028010229 | 0.180248309104 |
| H | 1.594681889510  | 0.075012344760  | 0.953455180626 |



|   |                 |                 |                 |
|---|-----------------|-----------------|-----------------|
| O | -2.593202165739 | -1.694532857157 | -0.080207502836 |
| C | -0.157803331577 | 1.688172745128  | 2.574469270354  |
| H | -2.645263860749 | 0.413605248876  | 1.898732795779  |
| H | 0.049388450149  | -2.190063513881 | 0.679886239750  |
| O | 1.179034037254  | 2.004392502541  | 2.638725371613  |
| O | -1.012148375395 | 2.295038912600  | 3.232529912446  |
| C | 1.547671573139  | 3.106147605496  | 3.523962219668  |
| H | 2.623923118916  | 3.218519565234  | 3.405340120180  |
| H | 1.023770533555  | 4.019426136237  | 3.230934181708  |
| H | 1.291077134254  | 2.863222433514  | 4.558181276846  |
| C | -1.030032276977 | -1.730357432278 | -3.480315408014 |
| C | -0.873706050864 | -1.049698035262 | -2.335687788932 |
| C | 0.206362626456  | -1.349040798610 | -1.320959839237 |
| H | -1.512968587403 | -0.207644455005 | -2.093325385470 |
| H | -1.807761107596 | -1.454666382430 | -4.183674367128 |
| H | -0.417167225370 | -2.589786523068 | -3.740076351884 |
| O | 1.281251117451  | -0.264242811289 | -1.548475526513 |
| C | 2.436946796813  | -0.875417538257 | -1.782376796245 |
| C | 2.328275860099  | -2.291647457552 | -1.770367660562 |
| C | 1.009920451951  | -2.601883317674 | -1.526872487757 |
| H | 3.301661957891  | -0.248961965256 | -1.946305810592 |
| H | 0.560848986823  | -3.580300071610 | -1.437017377942 |
| H | 3.148302831072  | -2.975503844046 | -1.919276092488 |

29

TS106 -802.933209

|   |                 |                 |                 |
|---|-----------------|-----------------|-----------------|
| C | -1.738733694626 | -0.568516016023 | 1.998193973357  |
| C | -0.610390371220 | 0.411988496131  | 2.232093024814  |
| C | -0.143597008472 | 0.870079030692  | 1.050566090051  |
| C | -0.883403366012 | 0.206308071775  | -0.097155736653 |
| C | -1.899903842873 | -0.644677642549 | 0.574155633251  |
| H | -1.184572104280 | 0.895950069441  | -0.885766260088 |
| O | -2.377625741932 | -1.150628680448 | 2.919166540249  |
| C | 0.923087896814  | 1.866806151956  | 0.880085411758  |
| H | -0.259266898596 | 0.696582488555  | 3.216131795643  |
| H | -2.703181779337 | -1.170475888479 | 0.078588428245  |
| O | 0.899666077442  | 2.427076208844  | -0.376559865646 |
| O | 1.745540586721  | 2.207411197984  | 1.742862549479  |
| C | 1.938318866488  | 3.408574715196  | -0.673977859653 |
| H | 1.730674625804  | 3.746007015637  | -1.687991382409 |
| H | 1.888311576394  | 4.239870608518  | 0.033278550204  |
| H | 2.924490382519  | 2.941722041496  | -0.609758973966 |
| C | 0.442893835236  | -2.901856026152 | 0.852361319232  |
| C | 0.834740936061  | -1.771655600716 | 0.246219442852  |
| C | -0.042406586265 | -0.972040519235 | -0.687527270008 |
| H | 1.820389587671  | -1.353108233554 | 0.418961955828  |
| H | 1.107158278846  | -3.413899305479 | 1.540655745720  |

|   |                 |                 |                 |
|---|-----------------|-----------------|-----------------|
| H | -0.552731547484 | -3.313766654829 | 0.723089670323  |
| O | 1.326207159405  | -0.305699993784 | -1.660199798106 |
| C | 1.075872412473  | -0.636532785103 | -2.877515366733 |
| C | -0.052859144654 | -1.502229893391 | -3.047267239315 |
| C | -0.693675776558 | -1.641852248250 | -1.844350561791 |
| H | 1.675680651367  | -0.215489037652 | -3.680315069343 |
| H | -1.646075512481 | -2.137884141460 | -1.721876463618 |
| H | -0.385487597258 | -1.895557266690 | -3.995305738678 |

29

TS107 -802.932742

|   |                 |                 |                 |
|---|-----------------|-----------------|-----------------|
| C | -2.539399426277 | 1.437980501828  | -0.523596378020 |
| C | -1.663129146430 | 1.058944610071  | -1.690646217443 |
| C | -0.765789584616 | 0.108730283896  | -1.328910894034 |
| C | -0.977752910324 | -0.265479096869 | 0.139443744621  |
| C | -2.101086288800 | 0.609509779527  | 0.559120833819  |
| H | -1.134828323973 | -1.341350423611 | 0.257106113375  |
| O | -3.458421416528 | 2.307936181706  | -0.572551315456 |
| C | 0.179407948329  | -0.528077800572 | -2.250475036372 |
| H | -1.764004588419 | 1.490889819809  | -2.679241432984 |
| H | -2.483462280711 | 0.649697362259  | 1.567253292110  |
| O | 0.888164263448  | -1.554809697864 | -1.644793235023 |
| O | 0.349795710259  | -0.237611925575 | -3.441980684220 |
| C | 1.798472499741  | -2.311781303121 | -2.502760364855 |
| H | 2.250406683903  | -3.058624864097 | -1.851241473099 |
| H | 1.242402563787  | -2.788651841894 | -3.312899864037 |
| H | 2.555437774954  | -1.650136776531 | -2.931079201153 |
| C | 1.673738968741  | 2.100571518372  | 1.597353018446  |
| C | 0.592838004516  | 1.573951919805  | 0.978284817362  |
| C | 0.281339172799  | 0.142854581254  | 0.949956805366  |
| H | -0.137600748168 | 2.213324255195  | 0.486812522086  |
| H | 1.870457996838  | 3.166043723535  | 1.549610481112  |
| H | 2.367130241476  | 1.497455467300  | 2.178394976236  |
| O | -0.490327373078 | -0.379232968810 | 2.659907379742  |
| C | 0.269827203370  | -1.327756969828 | 3.045027615680  |
| C | 1.364430064988  | -1.668416115776 | 2.167965648435  |
| C | 1.391616335816  | -0.815581684409 | 1.103238861564  |
| H | 0.085352247837  | -1.810480044292 | 4.004057461744  |
| H | 2.168797599189  | -0.805268898609 | 0.350783468915  |
| H | 2.082080609775  | -2.446873168665 | 2.378049322064  |

29

TS108 -802.931562

|   |                 |                 |                |
|---|-----------------|-----------------|----------------|
| C | -0.954633862433 | 1.644061224303  | 1.698879933128 |
| C | -1.173841867727 | 1.107960570144  | 0.385822665681 |
| C | -0.431109339593 | -0.179180306050 | 0.225280212057 |
| C | 0.217403792772  | -0.391169133577 | 1.592747063113 |
| C | -0.079914943639 | 0.640382700037  | 2.409349199367 |

|   |                 |                 |                 |
|---|-----------------|-----------------|-----------------|
| H | 0.803515293076  | -1.272223981060 | 1.817704247948  |
| O | -1.369842507877 | 2.722760266228  | 2.210542508863  |
| C | -1.285460625440 | -1.331646164486 | -0.267633091032 |
| H | -1.810376728993 | 1.529271308146  | -0.377668656726 |
| H | 0.245310480991  | 0.777121797026  | 3.433173515182  |
| O | -1.545252157198 | -2.223086742758 | 0.728373334841  |
| O | -1.749936201987 | -1.450587158402 | -1.408596722842 |
| C | -2.490907177749 | -3.300329368397 | 0.426440104544  |
| H | -2.597094002925 | -3.848479375041 | 1.360102885301  |
| H | -3.446170887441 | -2.877913250121 | 0.107046707063  |
| H | -2.091916034668 | -3.938619678424 | -0.365169574397 |
| C | 0.680360944165  | 1.730030426364  | -2.834123210342 |
| C | 0.198687592619  | 0.666817373339  | -2.169272546754 |
| C | 0.640118499896  | 0.290118752597  | -0.788630462056 |
| H | -0.550286769346 | 0.013577247522  | -2.601849911425 |
| H | 0.330989154793  | 1.955192643103  | -3.836177788194 |
| H | 1.403826825776  | 2.415909204750  | -2.401407038381 |
| O | 1.617344133934  | -1.164508551008 | -1.288226260329 |
| C | 2.831427736646  | -0.860555802559 | -0.968620266209 |
| C | 3.013821076814  | 0.424682225156  | -0.378072813032 |
| C | 1.783537621590  | 1.000417697522  | -0.155505957146 |
| H | 3.610832160574  | -1.608647327854 | -1.092231164422 |
| H | 1.623500546817  | 1.888796969663  | 0.438312233048  |
| H | 3.959572732409  | 0.802156556363  | -0.021897508378 |

29

TS109 -802.930024

|   |                 |                 |                 |
|---|-----------------|-----------------|-----------------|
| C | 1.925053981551  | -0.600662243300 | 0.292643740952  |
| C | 1.788560649374  | 0.057456831308  | -0.954879691524 |
| C | 0.479295771425  | -0.210936537672 | -1.455810340507 |
| C | -0.234632585798 | -1.073856797199 | -0.636647851270 |
| C | 0.635843623096  | -1.453630159027 | 0.509832078341  |
| H | -1.215589171268 | -1.474059073881 | -0.848130772369 |
| O | 2.847818609059  | -0.510025628823 | 1.171162214443  |
| C | -0.024880649781 | 0.366402170841  | -2.725404640385 |
| H | 2.510733350274  | 0.723807839828  | -1.401666655809 |
| H | 0.910378856768  | -2.514243667744 | 0.444067362115  |
| O | -1.270560703640 | -0.103618219273 | -3.056510064952 |
| O | 0.584658942003  | 1.186521663626  | -3.424240889482 |
| C | -1.860512738669 | 0.409512623302  | -4.291254803341 |
| H | -2.824094396912 | -0.089638157465 | -4.374226286838 |
| H | -1.984654275829 | 1.493420756703  | -4.227576775456 |
| H | -1.220058685339 | 0.170477352376  | -5.143771748079 |
| C | 1.009323407644  | -1.295505063982 | 3.036738301452  |
| C | 0.012432716588  | -1.278195040642 | 1.949804409631  |
| C | -0.596256593365 | 0.079112982040  | 2.148312722865  |
| H | -0.762975474636 | -2.034566547276 | 2.095190694476  |

|   |                 |                 |                |
|---|-----------------|-----------------|----------------|
| H | 0.867324242709  | -1.925335869445 | 3.912281772935 |
| H | 1.870045463090  | -0.639504528010 | 2.973208740106 |
| O | -1.591180597247 | 0.168822538222  | 3.128898967646 |
| C | -2.039954695787 | 1.476830311178  | 3.129940418521 |
| C | -1.360373900022 | 2.209205989686  | 2.190080848005 |
| C | -0.430146152540 | 1.313140955706  | 1.554255916650 |
| H | -2.823224158638 | 1.709589192450  | 3.830032439045 |
| H | 0.270590906511  | 1.548893232071  | 0.770058183551 |
| H | -1.504791669690 | 3.253250912550  | 1.967183796042 |

29

TS110 -802.929553

|   |                 |                 |                 |
|---|-----------------|-----------------|-----------------|
| C | 2.004085819017  | -2.612169294617 | -0.382107102743 |
| C | 1.240498895529  | -2.210747527977 | 0.853903805437  |
| C | 0.245317529465  | -1.369771724700 | 0.504057365538  |
| C | 0.309366710913  | -1.041671552007 | -0.991570909970 |
| C | 1.370086789522  | -1.904736505129 | -1.488209270581 |
| H | -0.652529852411 | -1.048639454885 | -1.502163977895 |
| O | 2.963940715086  | -3.418287543748 | -0.416694713380 |
| C | -0.786103784897 | -0.855532074029 | 1.427635074537  |
| H | 1.454891235988  | -2.580973908904 | 1.847511739600  |
| H | 1.585157155919  | -2.133529492220 | -2.521866253439 |
| O | -1.845043559966 | -0.322791001050 | 0.738266217686  |
| O | -0.747194644339 | -0.917690491786 | 2.662756483233  |
| C | -2.942366268317 | 0.227486215050  | 1.529684913020  |
| H | -3.618080691652 | 0.674818400110  | 0.803478646602  |
| H | -3.435484522830 | -0.569901495855 | 2.091202727101  |
| H | -2.561395116419 | 0.979263873481  | 2.225019671008  |
| C | 1.519155957373  | 0.720712335469  | -2.380569320457 |
| C | 0.841134447345  | 0.560278632460  | -1.112130845945 |
| C | -0.151013338147 | 1.631732753949  | -0.834456884636 |
| H | 1.523466043498  | 0.504460040198  | -0.248755597149 |
| H | 1.861045729478  | -0.127404599586 | -2.957492583085 |
| H | 1.678515525754  | 1.716533790071  | -2.787986951902 |
| O | -0.169491957474 | 2.162674837172  | 0.450029094096  |
| C | -1.176058070403 | 3.112903286583  | 0.488046041942  |
| C | -1.786364093998 | 3.193462074888  | -0.736866603674 |
| C | -1.124735963009 | 2.235763232645  | -1.590723243248 |
| H | -1.311169138170 | 3.625039733524  | 1.424661158248  |
| H | -1.356642660687 | 2.011709220489  | -2.619931624836 |
| H | -2.599809223835 | 3.848373784546  | -1.003448240854 |

29

TS111 -802.928453

|   |                |                 |                 |
|---|----------------|-----------------|-----------------|
| C | 1.380094094297 | -1.910379930986 | -2.014104253167 |
| C | 0.313779666770 | -1.940063425650 | -1.016694806272 |
| C | 0.259575786282 | -0.653546650784 | -0.318470507673 |
| C | 1.433879293383 | 0.137799412222  | -0.899473070961 |

|   |                 |                 |                 |
|---|-----------------|-----------------|-----------------|
| C | 2.025310632006  | -0.556200492270 | -1.889678525589 |
| H | 1.672511460324  | 1.134461612546  | -0.553279251840 |
| O | 1.715430925307  | -2.816120094827 | -2.813419585210 |
| C | 0.185838244383  | -0.803716655694 | 1.187207347352  |
| H | -0.184349905023 | -2.847524627305 | -0.706798004176 |
| H | 2.842998480640  | -0.236434407605 | -2.521110077447 |
| O | 1.255774644334  | -0.264245568660 | 1.825325342466  |
| O | -0.760162400321 | -1.348295827558 | 1.773839366625  |
| C | 1.292346957371  | -0.386499727080 | 3.285221683853  |
| H | 2.220415486500  | 0.095707969077  | 3.583959344764  |
| H | 0.426615887168  | 0.117241838493  | 3.721328910887  |
| H | 1.285726589421  | -1.440694803306 | 3.570743130305  |
| C | -2.212342186454 | -0.800070958177 | -0.747603127015 |
| C | -1.120374480538 | 0.155819570573  | -0.751444100063 |
| C | -1.416106614540 | 1.407139855364  | 0.001189018028  |
| H | -0.788479655469 | 0.441644455555  | -1.762149098199 |
| H | -2.036482506018 | -1.864468644906 | -0.714148229854 |
| H | -3.241605733019 | -0.448315149608 | -0.733019687299 |
| O | -0.945937982060 | 2.604088630246  | -0.534141978771 |
| C | -1.306949428129 | 3.613952203717  | 0.343235457913  |
| C | -1.984772792381 | 3.084790337229  | 1.410387009789  |
| C | -2.050730146924 | 1.659370148353  | 1.192961930056  |
| H | -1.013938836583 | 4.611666221795  | 0.066987465618  |
| H | -2.487815879535 | 0.914265207610  | 1.838957019950  |
| H | -2.384414476672 | 3.632561637561  | 2.247925633931  |

29

TS112 -802.926804

|   |                 |                 |                 |
|---|-----------------|-----------------|-----------------|
| C | 1.949880888578  | -0.505981302239 | -0.298996693027 |
| C | 1.379760850766  | 0.787246902083  | -0.485107781894 |
| C | 0.150879025593  | 0.640382175770  | -1.184959972745 |
| C | -0.128795650168 | -0.692222867995 | -1.459151404894 |
| C | 0.937410260919  | -1.533252253835 | -0.859293624978 |
| H | -0.991018870065 | -1.052958523107 | -2.000715741802 |
| O | 3.003672810174  | -0.852223729250 | 0.322356453885  |
| C | -0.694976034281 | 1.794331153238  | -1.570726793860 |
| H | 1.800547006752  | 1.719574794705  | -0.138368145790 |
| H | 1.377098145222  | -2.246687910764 | -1.557474258260 |
| O | -1.813777852096 | 1.409733105423  | -2.261556598344 |
| O | -0.443127280992 | 2.976990864239  | -1.307390689216 |
| C | -2.721051320740 | 2.473166369534  | -2.690205540349 |
| H | -3.530918692252 | 1.963360593428  | -3.208232205429 |
| H | -3.094008681095 | 3.021985517262  | -1.822096350711 |
| H | -2.201259073497 | 3.165090978422  | -3.357280037291 |
| C | 1.517416180989  | -3.194236726833 | 0.928167710212  |
| C | 0.425193438812  | -2.349499432498 | 0.423160624703  |
| C | -0.088244703161 | -1.393696125702 | 1.485434157067  |

|   |                 |                 |                |
|---|-----------------|-----------------|----------------|
| H | -0.437658191287 | -2.973971150668 | 0.147719485386 |
| H | 1.294073711556  | -4.158084780889 | 1.377866330260 |
| H | 2.547770609021  | -2.873722618606 | 0.807796214628 |
| O | -1.366631417659 | -0.895297648839 | 1.261251245932 |
| C | -1.652427571941 | -0.023331075428 | 2.303893654722 |
| C | -0.595053530358 | 0.019096321376  | 3.172598446928 |
| C | 0.412826637823  | -0.874131629134 | 2.648956781480 |
| H | -2.616404717933 | 0.452822208441  | 2.271909098725 |
| H | 1.387697186054  | -1.075724839281 | 3.061699547606 |
| H | -0.529974636848 | 0.609835259703  | 4.071550782449 |

29

TS113 -802.926180

|   |                 |                 |                 |
|---|-----------------|-----------------|-----------------|
| C | -0.555944308119 | 1.093457024095  | 1.825707994909  |
| C | -0.232664929936 | -0.315703128021 | 1.885565003667  |
| C | 0.859482022536  | -0.547157537309 | 1.042854308045  |
| C | 1.307405453113  | 0.626255212656  | 0.399977374069  |
| C | 0.422067316257  | 1.743472677170  | 0.793965533443  |
| H | 2.205156927704  | 0.696810204789  | -0.197532943813 |
| O | -1.454508868527 | 1.740777654774  | 2.410975203390  |
| C | 1.460915807641  | -1.890420474070 | 0.849857890364  |
| H | -0.783102849683 | -1.063076458406 | 2.436954838938  |
| H | 0.935909347518  | 2.599659608362  | 1.237484094025  |
| O | 2.446344405881  | -1.879214142648 | -0.107247207618 |
| O | 1.130768489803  | -2.917376383844 | 1.453390314933  |
| C | 3.120408769353  | -3.150119369745 | -0.369855087787 |
| H | 3.862013346994  | -2.926023219059 | -1.134216637269 |
| H | 3.595841659564  | -3.519934996106 | 0.541714238465  |
| H | 2.400518597405  | -3.891483257392 | -0.725021953313 |
| C | 0.216983037508  | 3.059158330925  | -1.433937215913 |
| C | -0.474133210803 | 2.317987850959  | -0.380474129690 |
| C | -1.040618882242 | 1.211006042948  | -1.233791666706 |
| H | -1.294682238123 | 2.888626828676  | 0.063491332080  |
| H | -0.190390631496 | 3.982031224142  | -1.834999374221 |
| H | 1.118432394412  | 2.655686490838  | -1.886824150001 |
| O | -2.420987239266 | 1.116604057258  | -1.333561141250 |
| C | -2.698681639445 | -0.035951942536 | -2.059028064607 |
| C | -1.530578211624 | -0.648153432581 | -2.431814882801 |
| C | -0.452056201517 | 0.162181528377  | -1.925369332890 |
| H | -3.740385319255 | -0.256592271643 | -2.212415581885 |
| H | 0.600591202694  | 0.007588673656  | -2.084182685775 |
| H | -1.442028765269 | -1.555862952290 | -3.005348041244 |

29

TS114 -802.925853

|   |                 |                 |                 |
|---|-----------------|-----------------|-----------------|
| C | -0.205909898449 | -0.390925840065 | -2.149109628365 |
| C | 0.851474443265  | 0.431837804595  | -1.575947184516 |
| C | 0.279649431644  | 1.284415302348  | -0.632617954694 |

|   |                 |                 |                 |
|---|-----------------|-----------------|-----------------|
| C | -1.113229180656 | 1.078932283326  | -0.499252142830 |
| C | -1.504768848912 | -0.063135165700 | -1.363391235920 |
| H | -1.772413325879 | 1.718601463587  | 0.069170038172  |
| O | -0.147456838613 | -1.225798466395 | -3.073994466141 |
| C | 1.067354204277  | 2.278297255396  | 0.139649455546  |
| H | 1.902598062162  | 0.353477076446  | -1.812084756676 |
| H | -2.334455029696 | 0.126447082706  | -2.046815293644 |
| O | 0.292854403298  | 2.948242571463  | 1.050543299433  |
| O | 2.277235881376  | 2.490102395827  | 0.001585061184  |
| C | 0.961427154080  | 3.964339454673  | 1.863855334098  |
| H | 0.191701823145  | 4.344644201772  | 2.532349959693  |
| H | 1.784267559157  | 3.515301744904  | 2.424983713119  |
| H | 1.352836611137  | 4.758317761717  | 1.223473866691  |
| C | -3.034811139063 | -0.959842278915 | 0.383423248887  |
| C | -1.899699525061 | -1.317671785966 | -0.473224691290 |
| C | -0.718812390299 | -1.734568741271 | 0.386842467165  |
| H | -2.131140382756 | -2.178924647519 | -1.115012234413 |
| H | -3.735136079513 | -1.719411340373 | 0.718196052976  |
| H | -3.166651299582 | 0.053176887338  | 0.749115989319  |
| O | 0.029424531293  | -2.811052154807 | -0.066283182152 |
| C | 1.089926857899  | -2.974451280144 | 0.816166032663  |
| C | 1.007826451391  | -2.040780298029 | 1.814828272115  |
| C | -0.168835506496 | -1.246480659662 | 1.547822521527  |
| H | 1.774630143932  | -3.772867890867 | 0.590746066527  |
| H | -0.545433272532 | -0.424682695692 | 2.133000311053  |
| H | 1.692084485371  | -1.927718009050 | 2.639716870751  |

29

TS115 -802.924625

|   |                 |                 |                 |
|---|-----------------|-----------------|-----------------|
| C | -0.878400847100 | -2.594727183419 | -0.821067624840 |
| C | 0.072187503853  | -1.529490681328 | -0.559450006485 |
| C | -0.555648515639 | -0.442007888371 | 0.231774200592  |
| C | -1.998064459242 | -0.919228749453 | 0.385163384377  |
| C | -2.158571472124 | -2.135126660529 | -0.199881459396 |
| H | -2.728893906259 | -0.348566381917 | 0.942932062588  |
| O | -0.698453199307 | -3.671703298999 | -1.448964586059 |
| C | 0.152164260023  | -0.110188624122 | 1.538185230969  |
| H | 1.134092424217  | -1.599163499929 | -0.750030847602 |
| H | -3.072498331685 | -2.713162743508 | -0.249326872148 |
| O | -0.670597774011 | 0.612397060573  | 2.362237848272  |
| O | 1.315415586647  | -0.391605642251 | 1.824396606381  |
| C | -0.093126798835 | 1.080810828996  | 3.624504311347  |
| H | -0.898551148725 | 1.616175474047  | 4.122973164157  |
| H | 0.242682690158  | 0.229701857991  | 4.220951223339  |
| H | 0.753242284512  | 1.740458147775  | 3.420277214213  |
| C | -1.513769168368 | 0.534703416608  | -1.758893424744 |
| C | -0.628580679652 | 0.892051573038  | -0.632957943097 |

|   |                 |                 |                 |
|---|-----------------|-----------------|-----------------|
| C | 0.740597597564  | 1.346583772814  | -1.055920192347 |
| H | -1.066317496630 | 1.716544390252  | -0.053289377007 |
| H | -1.989114867410 | 1.322542000515  | -2.339028999957 |
| H | -1.609659213351 | -0.485706858210 | -2.107486043111 |
| O | 1.304195747117  | 2.359447145172  | -0.285956580260 |
| C | 2.568078523217  | 2.611003213251  | -0.804677535361 |
| C | 2.799461416277  | 1.793496540323  | -1.877264079596 |
| C | 1.617064984360  | 0.978719250244  | -2.044663157008 |
| H | 3.143129201009  | 3.370564315204  | -0.305313064723 |
| H | 1.447601321691  | 0.222591194511  | -2.793476284275 |
| H | 3.693995467380  | 1.765273679137  | -2.477351981048 |

29

TS116 -802.924567

|   |                 |                 |                 |
|---|-----------------|-----------------|-----------------|
| C | -1.881487715933 | -1.481741843032 | -1.021255162770 |
| C | -1.562943458766 | -1.322592621531 | 0.446252064489  |
| C | -0.229555227099 | -1.193852512327 | 0.607281063435  |
| C | 0.484512027269  | -1.224505808433 | -0.746676039854 |
| C | -0.612281436019 | -1.415439327141 | -1.705191425959 |
| H | 1.275275510140  | -1.978868931258 | -0.777394890943 |
| O | -3.037014585640 | -1.646994246986 | -1.498041524533 |
| C | 0.439573676948  | -1.039985558609 | 1.907905004709  |
| H | -2.310064796674 | -1.328023320367 | 1.229320014519  |
| H | -0.496762796173 | -1.559410420711 | -2.771438688980 |
| O | 1.814071515543  | -1.022418329639 | 1.778283042525  |
| O | -0.119675085778 | -0.944149617212 | 3.008271962629  |
| C | 2.585497328898  | -0.882872645226 | 3.012638542200  |
| H | 3.628497381209  | -0.934913291562 | 2.705304212379  |
| H | 2.363181151100  | 0.075577112741  | 3.487706470325  |
| H | 2.339381722480  | -1.692272111375 | 3.703656488674  |
| C | 1.794232628785  | 0.426247349465  | -2.295809388545 |
| C | 1.267428214865  | 0.168555677916  | -0.966934627951 |
| C | 0.291500988717  | 1.316378349111  | -0.900888502040 |
| H | 2.022391647644  | 0.280544922335  | -0.187582724499 |
| H | 2.782939791655  | 0.851512323789  | -2.440449692343 |
| H | 1.173009457194  | 0.265462842500  | -3.172657150709 |
| O | 0.524782839983  | 2.280712670613  | 0.070802124530  |
| C | -0.562482602580 | 3.150744930956  | 0.045395816160  |
| C | -1.449000326012 | 2.763444737185  | -0.922962791547 |
| C | -0.894494258061 | 1.592799366951  | -1.559054726509 |
| H | -0.539869600163 | 3.953305198756  | 0.761450141540  |
| H | -1.300836056336 | 1.062545286673  | -2.402355523253 |
| H | -2.378557498822 | 3.248650592106  | -1.169713061841 |

29

TS117 -802.923557

|   |                |                 |                 |
|---|----------------|-----------------|-----------------|
| C | 2.386011681558 | 0.016332735617  | 0.521129243762  |
| C | 1.819355202638 | -0.278447497967 | -0.857045259222 |



|   |                 |                 |                 |
|---|-----------------|-----------------|-----------------|
| C | 0.669936941765  | -0.991438171172 | -0.734511429040 |
| C | 0.361721837384  | -1.203737514107 | 0.737849055051  |
| C | 1.489895554374  | -0.604711366990 | 1.435385618733  |
| H | 0.090523790457  | -2.231153232358 | 0.995465056720  |
| O | 3.468622315696  | 0.655144296207  | 0.692107062506  |
| C | -0.183673487319 | -1.415520375131 | -1.807520808624 |
| H | 2.284701073875  | 0.054461979389  | -1.778158535064 |
| H | 1.623970118943  | -0.616356865019 | 2.506946727201  |
| O | -1.462737337345 | -1.862369899174 | -1.265562034602 |
| O | -0.022688205241 | -1.465847215176 | -3.023264962636 |
| C | -2.445933656243 | -2.388490343169 | -2.222415986669 |
| H | -3.314301307058 | -2.676210462335 | -1.629526301331 |
| H | -2.701400189108 | -1.622016153836 | -2.956229749588 |
| H | -2.017137023084 | -3.255753650341 | -2.723813822751 |
| C | -2.195840936701 | -0.891560628879 | 0.242887492676  |
| C | -1.119055423209 | -0.357679544044 | 1.056219014105  |
| C | -0.903159836174 | 1.105383914295  | 0.933406495006  |
| H | -1.251698836936 | -0.630342751864 | 2.106921247891  |
| H | -2.708049988002 | -1.787748666635 | 0.581109027413  |
| H | -2.757800127763 | -0.228275664670 | -0.409288737591 |
| O | -0.769912018978 | 1.793054514895  | 2.130598214052  |
| C | -0.499958075592 | 3.117417565577  | 1.817016376201  |
| C | -0.472132943191 | 3.274566637483  | 0.458278326553  |
| C | -0.728835367612 | 1.973237849352  | -0.115401956469 |
| H | -0.350074549536 | 3.781905211832  | 2.649166054333  |
| H | -0.749169859824 | 1.727844162218  | -1.165407287874 |
| H | -0.273498880652 | 4.189267591891  | -0.075344539131 |

29

TS118 -802.923282

|   |                 |                 |                 |
|---|-----------------|-----------------|-----------------|
| C | -1.653951078384 | 1.525172144621  | 0.014879321800  |
| C | -0.286585096636 | 1.242261990131  | 0.344321942318  |
| C | -0.140594539226 | -0.194023811224 | 0.714769899670  |
| C | -1.553327601253 | -0.750250589919 | 0.570785118342  |
| C | -2.394884282246 | 0.209852012988  | 0.151087869208  |
| H | -1.784420930418 | -1.788273887008 | 0.776664950081  |
| O | -2.187790843341 | 2.615148760623  | -0.337931579169 |
| C | 0.467586738736  | -0.226806692596 | 2.110325808706  |
| H | 0.482868215072  | 1.992213336568  | 0.475844690053  |
| H | -3.453096948755 | 0.114165868727  | -0.055870627542 |
| O | -0.421177628365 | -0.351697773206 | 3.119340689658  |
| O | 1.701244863929  | -0.125060769523 | 2.291068422694  |
| C | 0.082928447980  | -0.192981282161 | 4.486563671809  |
| H | -0.794394888728 | -0.299249028731 | 5.120483516086  |
| H | 0.825895734352  | -0.963133681918 | 4.705842388913  |
| H | 0.533221193121  | 0.795531323216  | 4.602122745076  |
| C | 2.240584340166  | -0.532081881495 | -0.131501065514 |

|   |                |                 |                 |
|---|----------------|-----------------|-----------------|
| C | 0.870492943287 | -1.027831604753 | -0.142061595542 |
| C | 0.823871129845 | -0.772857817678 | -1.620044652657 |
| H | 0.804366923094 | -2.099957280279 | 0.056748068609  |
| H | 3.089118721004 | -1.208062644473 | -0.165178712989 |
| H | 2.424213154461 | 0.535501374964  | -0.149681481944 |
| O | 0.815303938487 | -1.892287950552 | -2.458850711580 |
| C | 0.553196805100 | -1.430150092883 | -3.737411258501 |
| C | 0.411068855888 | -0.065444973741 | -3.734840191330 |
| C | 0.608229354267 | 0.374061692480  | -2.381095032351 |
| H | 0.509405277645 | -2.178970489455 | -4.509174436653 |
| H | 0.617862953734 | 1.384114576548  | -2.010968942044 |
| H | 0.207326104121 | 0.557155436757  | -4.589689269823 |

29

TS119 -802.922538

|   |                 |                 |                 |
|---|-----------------|-----------------|-----------------|
| C | 1.875907138819  | 0.759372148618  | -1.931792999134 |
| C | 2.468299350448  | 0.903406002392  | -0.569646186943 |
| C | 1.710047227362  | 0.248704636402  | 0.348361364331  |
| C | 0.499190069970  | -0.404786377432 | -0.302672503000 |
| C | 0.699974827109  | -0.079547317266 | -1.745199112335 |
| H | 0.345331782968  | -1.443224628368 | -0.016290389813 |
| O | 2.317742846444  | 1.265980247887  | -2.994446596873 |
| C | 2.100383278495  | 0.082539155287  | 1.760973167024  |
| H | 3.385769197986  | 1.440512449996  | -0.366237134383 |
| H | 0.082746218197  | -0.467100475289 | -2.544087243109 |
| O | 1.220362293215  | -0.735796521937 | 2.433277525620  |
| O | 3.092539302470  | 0.584233243951  | 2.304685386190  |
| C | 1.520012474906  | -1.015513113462 | 3.838249403294  |
| H | 0.719598712568  | -1.672098238495 | 4.173067239990  |
| H | 2.492113339464  | -1.506407890416 | 3.922677453638  |
| H | 1.535835708014  | -0.086312418108 | 4.413088596298  |
| C | -0.758976161470 | 1.364055723115  | 1.027785325143  |
| C | -0.789624224311 | 0.486693455547  | -0.103324437456 |
| C | -2.074480299642 | -0.220530308607 | -0.400851998753 |
| H | -0.627530989465 | 1.161868764797  | -1.047476861950 |
| H | -1.306447395146 | 2.301713941303  | 0.999921410844  |
| H | -0.174612792660 | 1.143311333688  | 1.910709091331  |
| O | -2.251406517569 | -0.721080245792 | -1.687506609598 |
| C | -3.487988999359 | -1.353402396724 | -1.714388590392 |
| C | -4.084308355551 | -1.256796994996 | -0.486765052439 |
| C | -3.171171639575 | -0.524597923433 | 0.362322940553  |
| H | -3.771767244309 | -1.798961695050 | -2.651507940100 |
| H | -3.305143286334 | -0.268427252062 | 1.400591678866  |
| H | -5.047734081250 | -1.653756009073 | -0.212182005765 |

29

TS120 -802.920117

|   |                |                 |                 |
|---|----------------|-----------------|-----------------|
| C | 1.606639970044 | -0.318919536087 | -1.089715426424 |
|---|----------------|-----------------|-----------------|

|   |                 |                 |                 |
|---|-----------------|-----------------|-----------------|
| C | 1.101435785915  | 0.973893307069  | -0.669671577819 |
| C | -0.270103851163 | 1.053049733335  | -0.975472907236 |
| C | -0.738367352642 | -0.126714843827 | -1.566505145748 |
| C | 0.390034944796  | -1.122575853488 | -1.564921316329 |
| H | -1.719509884583 | -0.281200621643 | -1.992425967898 |
| O | 2.776081032925  | -0.774032623997 | -1.042033879053 |
| C | -1.094337588908 | 2.251910837970  | -0.683996877566 |
| H | 1.690464022763  | 1.756904086249  | -0.213630248157 |
| H | 0.580933609861  | -1.626694573827 | -2.513402735498 |
| O | -2.381673103225 | 2.108832930075  | -1.127149732497 |
| O | -0.688143809511 | 3.269719616441  | -0.110821998205 |
| C | -3.291758578843 | 3.228806559059  | -0.888874306129 |
| H | -4.237133308551 | 2.924699172881  | -1.333522213007 |
| H | -3.400469805297 | 3.401746369769  | 0.184431807560  |
| H | -2.906885984227 | 4.134353197308  | -1.363740732520 |
| C | 0.131885931248  | -3.524873078871 | -0.782938721959 |
| C | -0.062750683412 | -2.129508030768 | -0.465926753276 |
| C | 0.369784919407  | -1.758160171783 | 0.938514874698  |
| H | -1.184795006490 | -1.924623378442 | -0.393010726255 |
| H | -0.249154159489 | -4.290361005658 | -0.112843444322 |
| H | 0.581207878672  | -3.837636870935 | -1.720161670554 |
| O | -0.488079035957 | -0.924380106197 | 1.650048229012  |
| C | 0.121545580210  | -0.660069925454 | 2.868233455474  |
| C | 1.320031102298  | -1.319676860628 | 2.938699809600  |
| C | 1.476840468688  | -2.036686409537 | 1.695382084324  |
| H | -0.418606459995 | -0.015428303206 | 3.538768524245  |
| H | 2.317321198163  | -2.634387945140 | 1.385116225493  |
| H | 2.014232526186  | -1.297854865374 | 3.762644189751  |

29

TS121 -802.918754

|   |                 |                 |                 |
|---|-----------------|-----------------|-----------------|
| C | -0.561925916161 | 1.247415283594  | -0.438517491210 |
| C | -1.620723276676 | 0.331120410727  | -0.787585521157 |
| C | -1.038897814095 | -0.793453351920 | -1.392614836841 |
| C | 0.364591419764  | -0.718843123104 | -1.416247995511 |
| C | 0.791128245062  | 0.512271344311  | -0.722024919790 |
| H | 1.018624895096  | -1.498386614453 | -1.780035971325 |
| O | -0.632586043253 | 2.440134152977  | -0.056063189282 |
| C | -1.837914719659 | -1.928460232693 | -1.919464661101 |
| H | -2.673308369258 | 0.486743080215  | -0.604767552002 |
| H | 1.467760369111  | 1.173841624818  | -1.265996825326 |
| O | -1.046836625616 | -2.913248036797 | -2.452108562842 |
| O | -3.072046231359 | -2.002731276197 | -1.891419343866 |
| C | -1.731932468586 | -4.079934131467 | -3.007874515419 |
| H | -0.938788577973 | -4.719579460355 | -3.389829962456 |
| H | -2.303892025336 | -4.587219580198 | -2.227134496526 |
| H | -2.409358143531 | -3.772458462712 | -3.808032586283 |

|   |                |                 |                |
|---|----------------|-----------------|----------------|
| C | 2.979113029341 | -0.134874936083 | 0.432381922078 |
| C | 1.545444456379 | 0.059020444308  | 0.632062754586 |
| C | 1.536609312333 | 1.104735389169  | 1.726498875055 |
| H | 1.053335335543 | -0.836169660567 | 1.017159920836 |
| H | 3.484579380304 | -1.052136222691 | 0.718190210646 |
| H | 3.581686803250 | 0.692100529217  | 0.066873516057 |
| O | 1.533309751158 | 0.584281615559  | 3.022224814675 |
| C | 1.557186290049 | 1.665427508704  | 3.892454665394 |
| C | 1.588918769329 | 2.835194180334  | 3.180556667872 |
| C | 1.580547222471 | 2.478907816458  | 1.783016477902 |
| H | 1.531302031447 | 1.429329149547  | 4.941640997114 |
| H | 1.556433694117 | 3.149829214399  | 0.942730864472 |
| H | 1.597301332099 | 3.831919232595  | 3.589622880639 |

29

TS122 -802.918370

|   |                 |                 |                 |
|---|-----------------|-----------------|-----------------|
| C | 1.690743877973  | 1.292715894694  | 2.118059474613  |
| C | 1.397533586261  | 1.041152691584  | 0.744027356047  |
| C | 0.068506862493  | 0.266699467477  | 0.623025314965  |
| C | -0.308377865196 | 0.045946911893  | 2.094543152325  |
| C | 0.601798684874  | 0.603935115499  | 2.912029064451  |
| H | -1.215781227207 | -0.473407892537 | 2.380034862527  |
| O | 2.647728703092  | 1.934248355330  | 2.646511881092  |
| C | -1.055308563388 | 1.055485948208  | -0.044645064653 |
| H | 1.750351844629  | 1.726732238211  | -0.015242885425 |
| H | 0.578970185072  | 0.615032242652  | 3.995301713688  |
| O | -1.753428993256 | 0.266720664761  | -0.955661237096 |
| O | -1.358865866411 | 2.229052157050  | 0.154388794343  |
| C | -2.862961115716 | 0.900207623208  | -1.666518432416 |
| H | -3.268072215177 | 0.126255547779  | -2.316536684216 |
| H | -3.612664514466 | 1.245433186619  | -0.951226068394 |
| H | -2.499593930840 | 1.752002901838  | -2.246087426018 |
| C | 1.800960205300  | 0.431241392618  | -2.463347136218 |
| C | 0.868035335092  | -0.543807901888 | -2.632370758644 |
| C | 0.236657696787  | -1.229819138195 | -1.550750621937 |
| H | 0.593546722373  | -0.893709076943 | -3.622168573761 |
| H | 2.295543887412  | 0.866058594873  | -3.325416716926 |
| H | 2.106337740661  | 0.762500248471  | -1.476976134990 |
| O | -0.483969989290 | -2.308914522679 | -1.894125949215 |
| C | -0.960041484526 | -2.954819987185 | -0.707761328079 |
| C | -0.535013680943 | -2.290776721783 | 0.372158539791  |
| C | 0.315710948568  | -1.115856078419 | -0.055648646940 |
| H | -1.555729220917 | -3.832204739043 | -0.885256295137 |
| H | 1.388102843827  | -1.261363933362 | 0.230269310271  |
| H | -0.728652052850 | -2.549125206050 | 1.399911285418  |

29

TS123 -802.913544

|   |                 |                 |                 |
|---|-----------------|-----------------|-----------------|
| C | -1.880410271780 | 0.858024365313  | -1.856393622862 |
| C | -1.231635844541 | 1.546472249946  | -0.684684081878 |
| C | -0.963600776016 | 0.640091419017  | 0.277833704649  |
| C | -1.383638602863 | -0.760276274702 | -0.148726205989 |
| C | -1.991653507832 | -0.544788744049 | -1.473743835247 |
| H | -1.970964593552 | -1.257943700459 | 0.621371081513  |
| O | -2.258772363020 | 1.411327626697  | -2.916601144046 |
| C | -0.344913502418 | 0.939328198349  | 1.579080323875  |
| H | -1.025502413634 | 2.607785764390  | -0.647169775663 |
| H | -2.499202129321 | -1.301567286807 | -2.057169754112 |
| O | -0.344248707905 | -0.169769808979 | 2.396106752737  |
| O | 0.113902061280  | 2.031560634193  | 1.935985126009  |
| C | 0.281765453522  | -0.012011213722 | 3.706757788695  |
| H | 0.162815056650  | -0.975759815679 | 4.198486912121  |
| H | 1.338196432690  | 0.242385353294  | 3.586810331536  |
| H | -0.216114813920 | 0.780137979521  | 4.270682972054  |
| C | -0.227567143704 | -3.028883076276 | -0.007649349703 |
| C | -0.148592905315 | -1.713283972914 | -0.573150352530 |
| C | 1.162645618252  | -0.972818470362 | -0.463140322600 |
| H | -0.267541273602 | -1.810153174360 | -1.695464978571 |
| H | 0.171910031017  | -3.885377582744 | -0.542032036236 |
| H | -0.759243231198 | -3.210742893137 | 0.921544180458  |
| O | 1.467197984972  | -0.120743289740 | -1.515378326455 |
| C | 2.676008403967  | 0.491231048496  | -1.209113889809 |
| C | 3.134268385437  | 0.028810734842  | -0.005155125604 |
| C | 2.158854701978  | -0.924232845463 | 0.475035843535  |
| H | 3.047283432309  | 1.193992612987  | -1.933495805487 |
| H | 2.189451803927  | -1.491305750198 | 1.390551806516  |
| H | 4.046380100892  | 0.324481177449  | 0.486469413132  |

29

TS124 -802.907797

|   |                 |                 |                 |
|---|-----------------|-----------------|-----------------|
| C | 0.118701690076  | -2.155228296403 | 1.340736100554  |
| C | -0.143121168455 | -1.579158406256 | 0.014597367484  |
| C | 0.632886204794  | -0.344378325490 | -0.135240585504 |
| C | 1.081668130808  | -0.005699943892 | 1.304106976944  |
| C | 0.843063588089  | -1.063059525207 | 2.102271884744  |
| H | 1.583726952633  | 0.919116066995  | 1.555279012520  |
| O | -0.243080103012 | -3.250916503983 | 1.814363484780  |
| C | 1.951736434323  | -0.461529760744 | -0.928345624945 |
| H | -1.091314026181 | -1.750845786685 | -0.471998876998 |
| H | 1.096831239079  | -1.173526888715 | 3.147908230517  |
| O | 2.470430982816  | 0.785624343058  | -1.186692955407 |
| O | 2.525524551687  | -1.498770534899 | -1.254353748639 |
| C | 3.778455859876  | 0.840745785392  | -1.842488817338 |
| H | 3.992231899491  | 1.900968512254  | -1.960606578260 |
| H | 4.528784988388  | 0.354259685313  | -1.215343834882 |

|   |                 |                 |                 |
|---|-----------------|-----------------|-----------------|
| H | 3.735081056244  | 0.336968757341  | -2.810900944817 |
| C | -0.552673669286 | -0.182266026703 | -2.216901649163 |
| C | -0.322824103959 | 0.633513595505  | -1.022151109005 |
| C | -1.544105049510 | 1.054362644242  | -0.279190158831 |
| H | 0.311560479459  | 1.505050770498  | -1.225567212744 |
| H | 0.253943128890  | -0.346820789840 | -2.924688710044 |
| H | -1.545475679386 | -0.502024024515 | -2.515548087695 |
| O | -1.382252260309 | 2.146658874190  | 0.565331199152  |
| C | -2.600785391352 | 2.367243509891  | 1.193674656284  |
| C | -3.515325389203 | 1.445272527388  | 0.763170169827  |
| C | -2.832865700394 | 0.596649190067  | -0.187941225688 |
| H | -2.635732138033 | 3.188478905857  | 1.887372832775  |
| H | -3.258665591064 | -0.241593878268 | -0.716198938804 |
| H | -4.543091031282 | 1.367390220143  | 1.077432407281  |

**Figure S11.**

Variations in the four lowest transverse vibrational mode frequencies along the product side of the IRC path for the TSs which are shared by two AFIR paths.

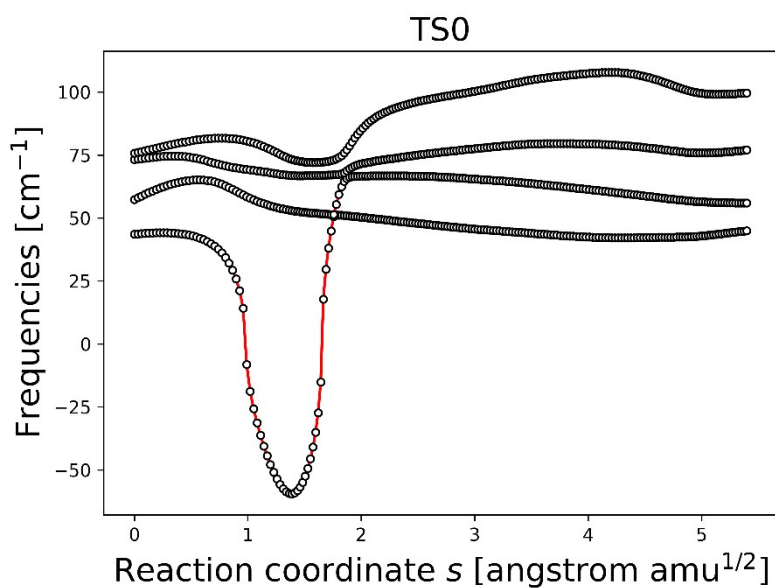

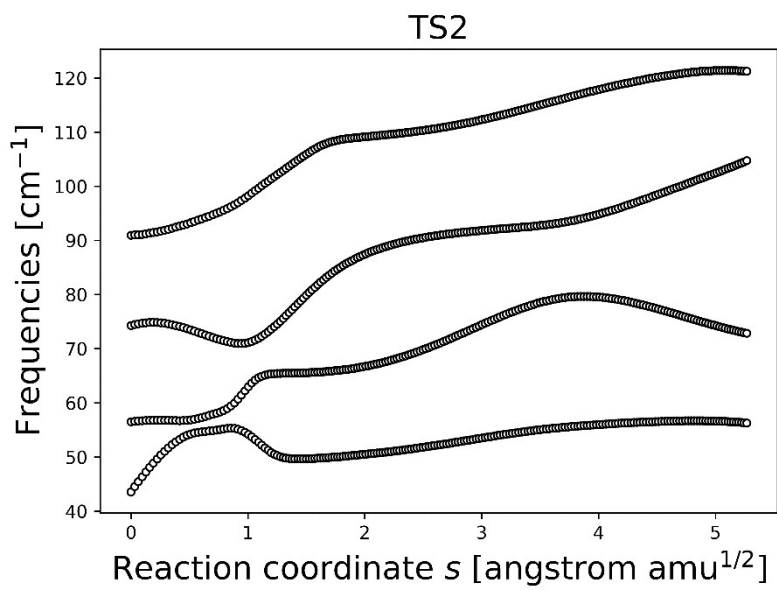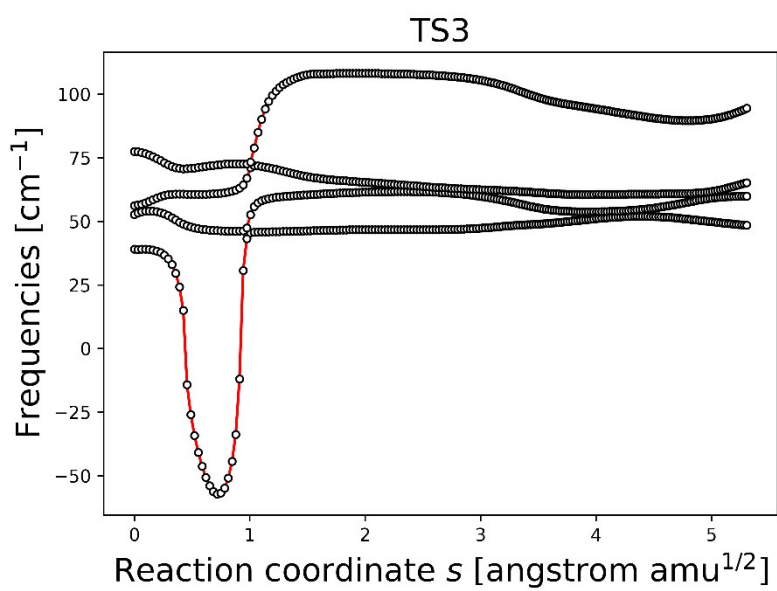

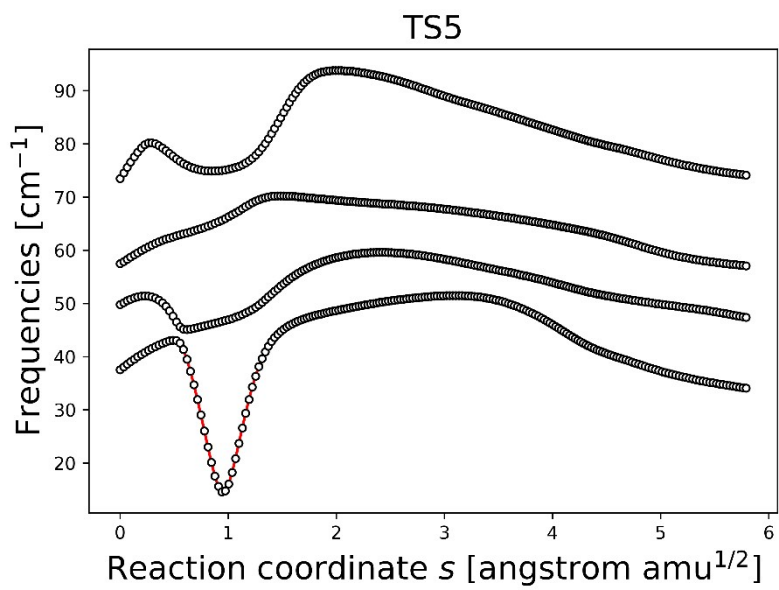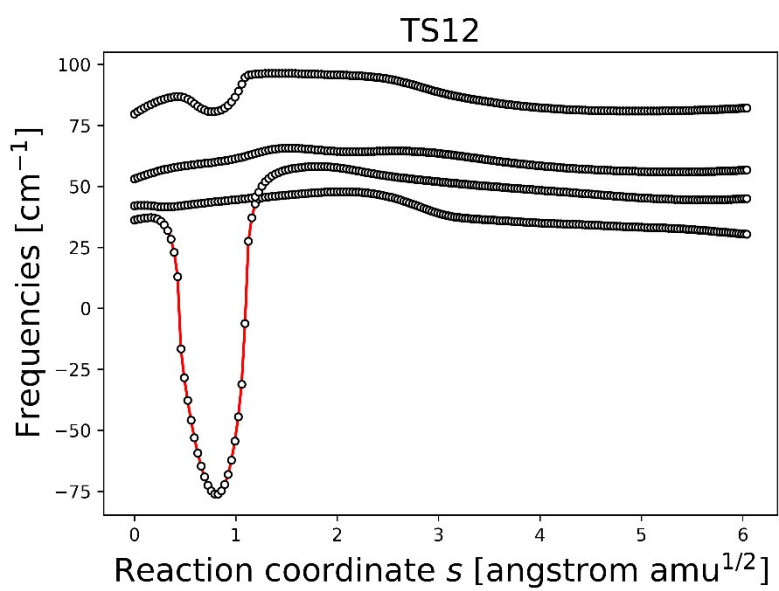



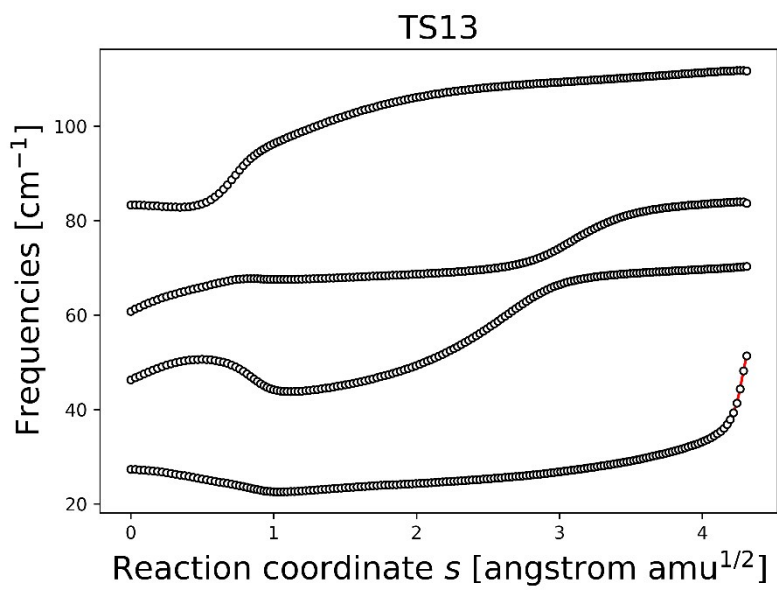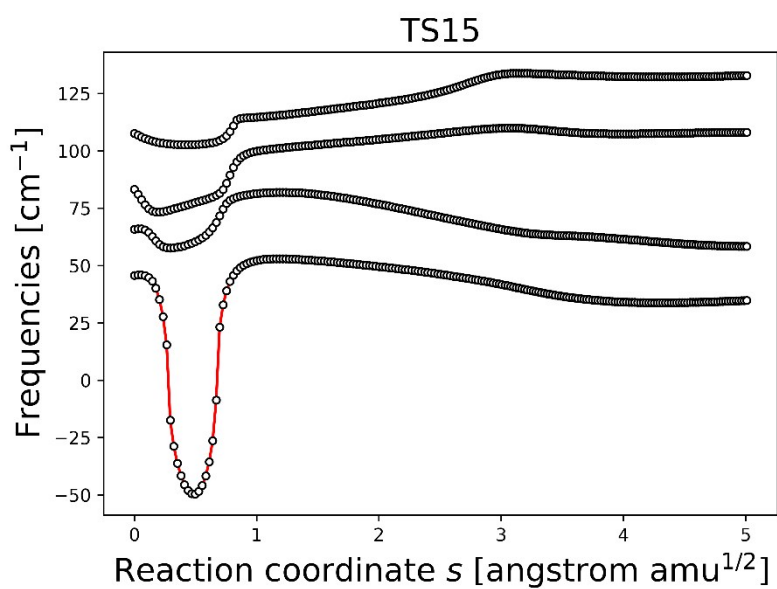

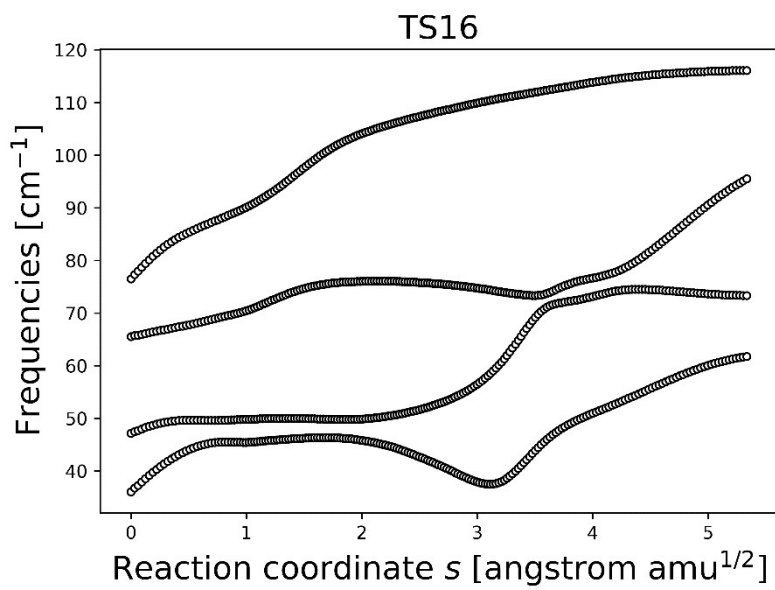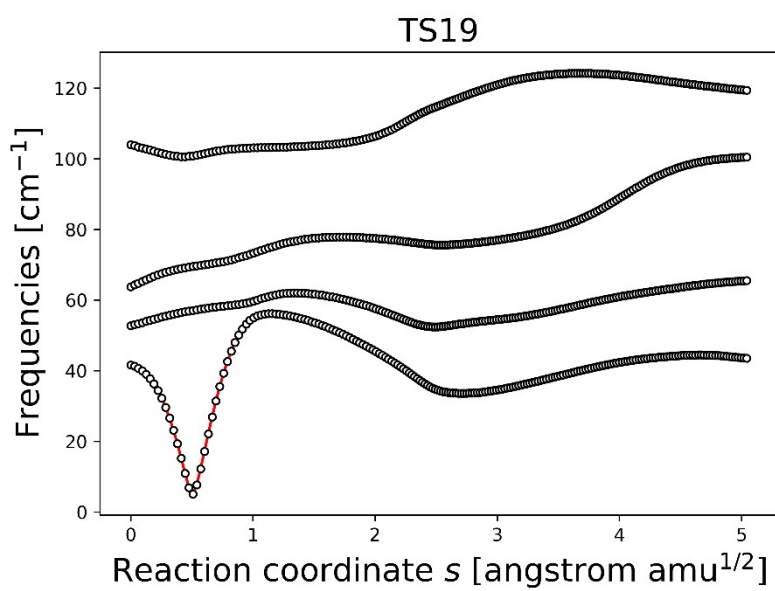

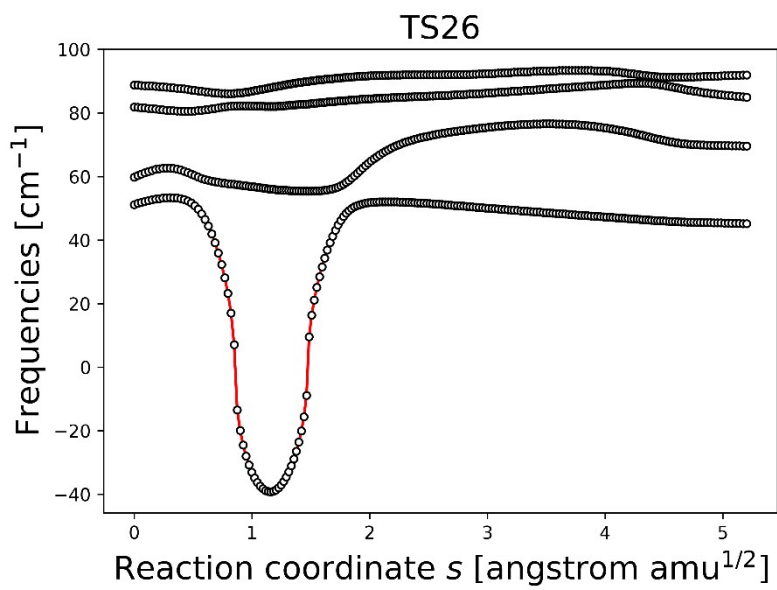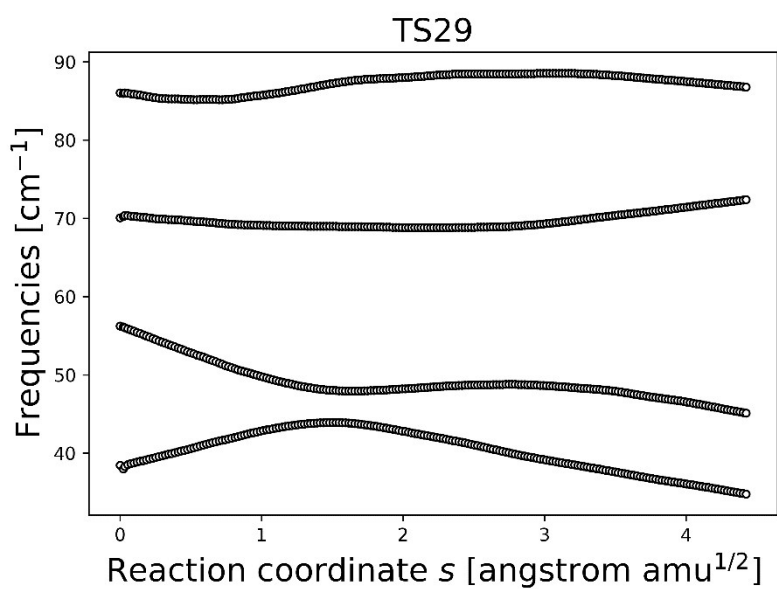

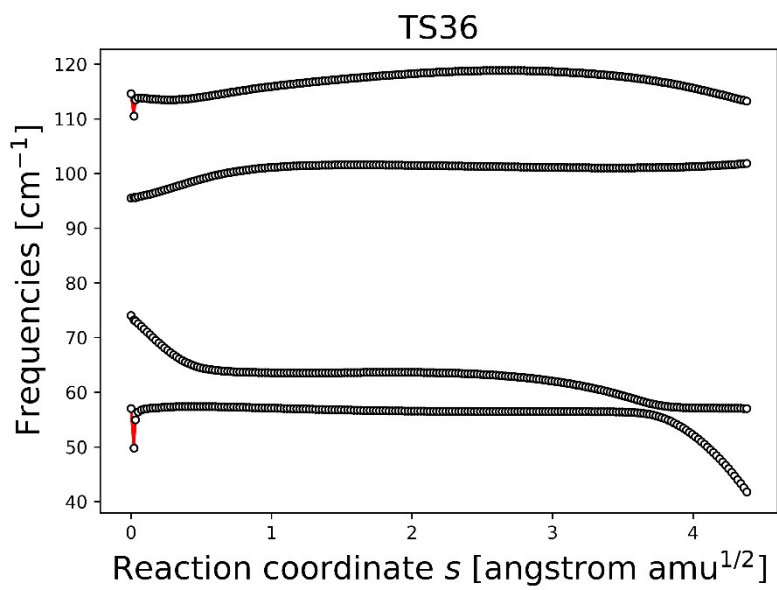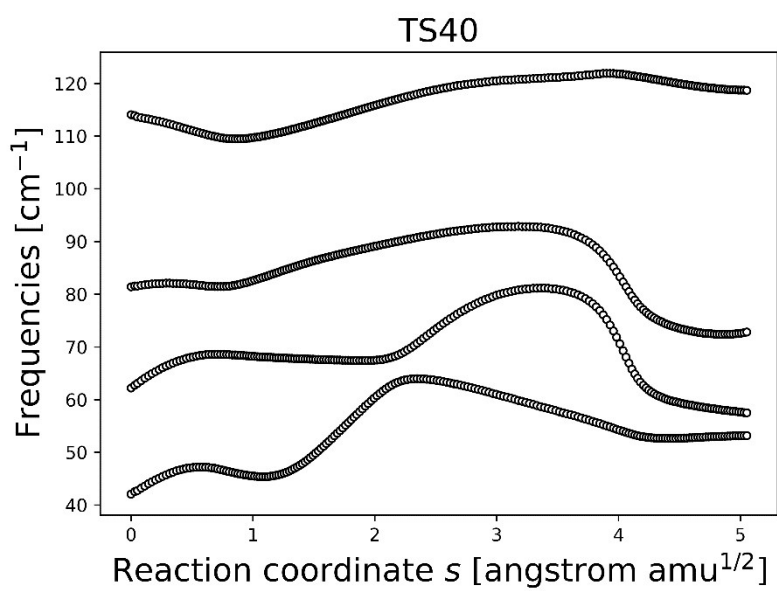

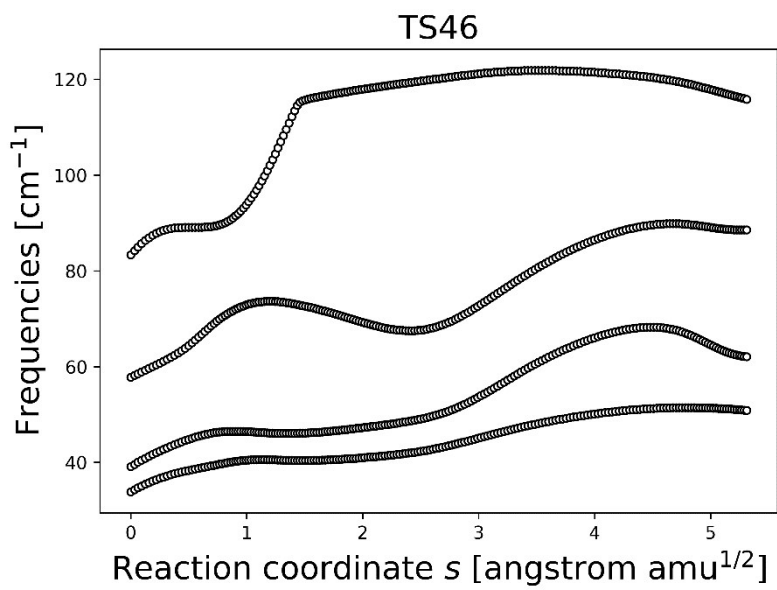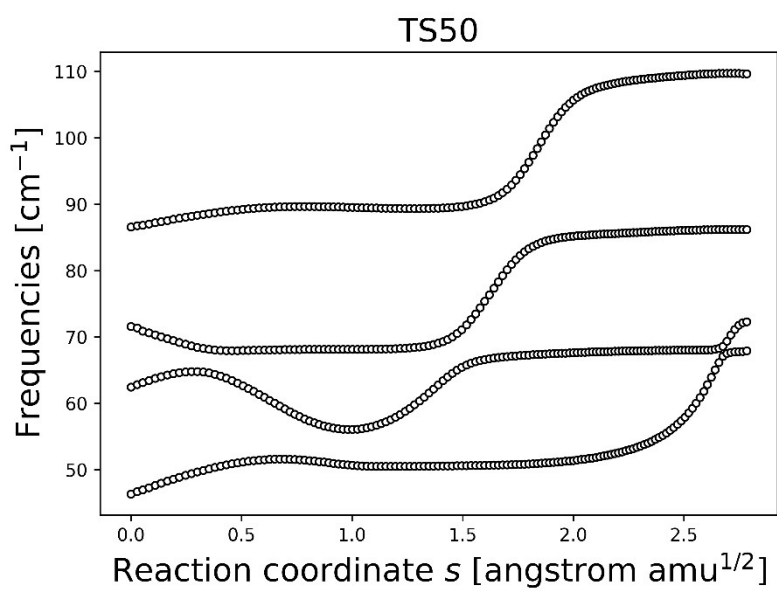

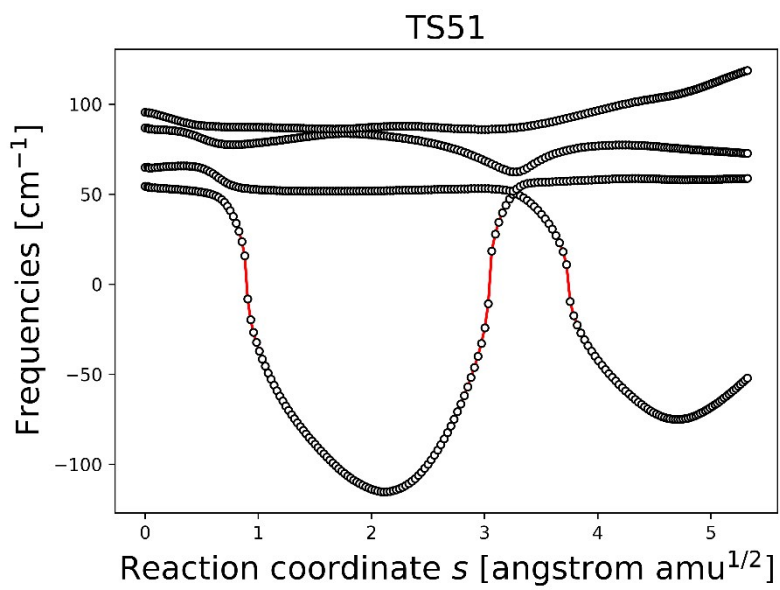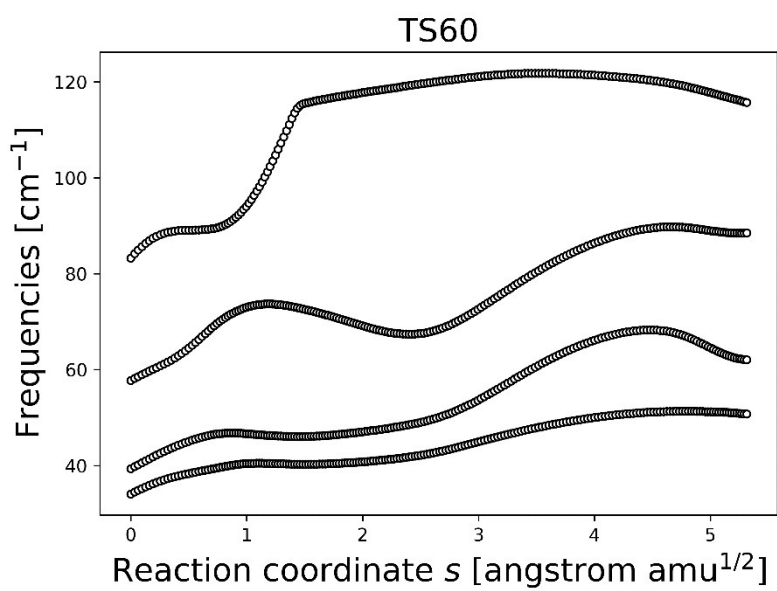

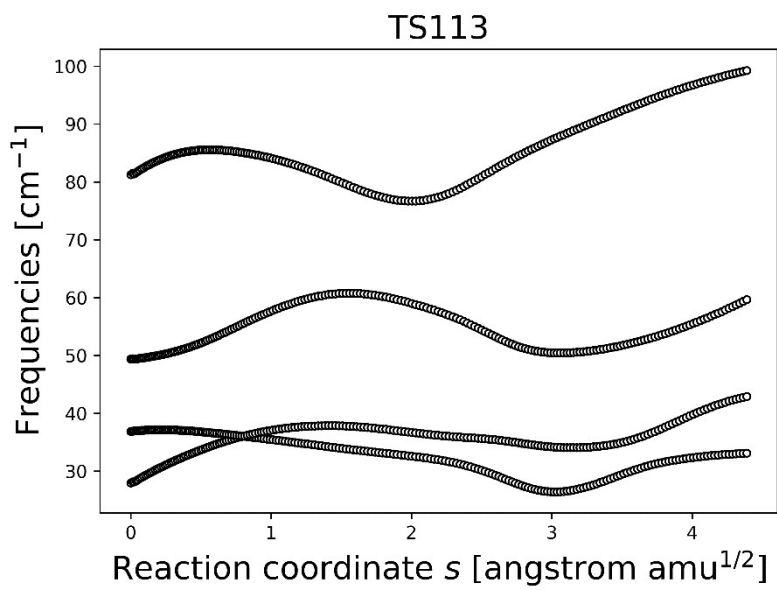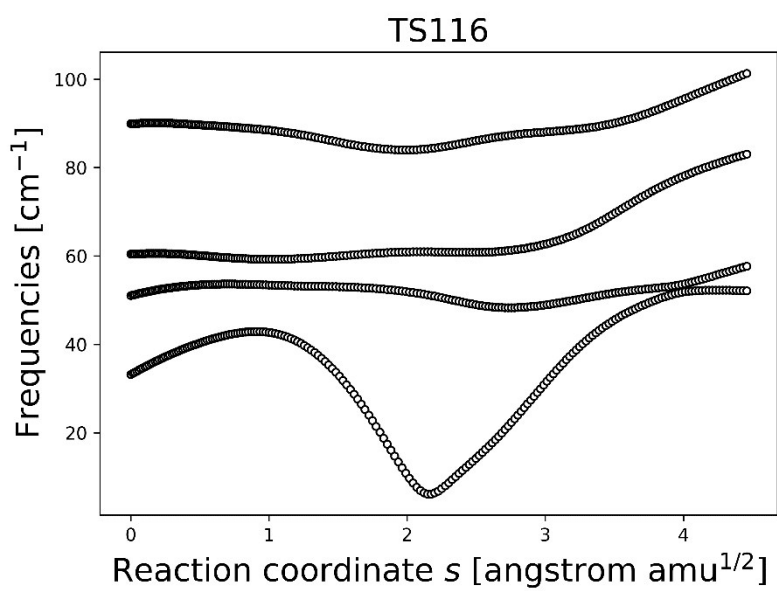

Supplement: d0cp02379e1.pdf [file d0cp02379e1.pdf]
